# Supplementary material for: Rapid recycling of glutamate transporters on the astroglial surface
Source: eLife. 2021 Apr 16;10:e64714. doi: 10.7554/eLife.64714 (PMC8079145; doi:10.7554/eLife.64714)
Supplement: Figure 1—source data 1. [file elife-64714-fig1-data1.xlsx]

## Sheet: Figure 1
Figure 1 B				Figure 1 C						Figure 1 E pH5.5			Figure1 E pH 7.4				Figure 1 F
Time, s	Current - WT GLT1	Current - GLT1-SEP		Voltage Vm	Norm current - WT GLT1	SE	Norm current -GLT1-SEP	SE		Time, s	F, soma	F, processes	Time, s	F, soma	F, processes		Somata	Processes
0	0	0.2955		-70	1	0	1	0		0.98541	0.9823	1.01774	0	0.68442	0.89627		0.29362	0.6065
0.0001	-0.88067	-0.02232		-60	0.90496	0.0273	0.91459	0.02942		2.48176	0.99843	0.99627	1.49635	0.70501	0.89911		0.55718	0.64782
0.0002	-1.38812	-0.06753		-40	0.79318	0.03666	0.77677	0.02649		3.97811	0.98867	0.98944	2.9927	0.67438	0.87058		0.5016	0.60751
0.0003	-1.44243	-0.29285		-20	0.62928	0.03453	0.64352	0.02489		5.47446	1.0143	0.99491	4.48906	0.70256	0.89787		0.38322	0.39631
0.0004	-1.28466	-0.12639		0	0.51289	0.0205	0.49498	0.01959		6.97082	1.0163	1.00164	5.98541	0.68769	0.88762			0.83917
0.0005	-1.2651	-0.13488		20	0.40077	0.01818	0.39449	0.0199		8.46717	1.02574	0.9966	7.48176	0.67841	0.88022		0.64814	0.85781
0.0006	-1.27034	-0.2945		40	0.31153	0.02698	0.31871	0.01879		9.96352	1.03796	1.00251	8.97811	0.66427	0.86569			0.91473
0.0007	-1.43055	-0.20605								11.4599	1.00797	0.98825	10.4745	0.66031	0.83442		0.66324	0.87782
0.0008	-1.2643	-0.27752								12.9562	1.01432	0.98561	11.9708	0.64843	0.86008
0.0009	-1.30101	-0.26928								14.4526	1.00263	0.51475	13.4672	0.66886	0.8763		0.50783	0.71846	Mean
0.001	-1.23731	-0.211								15.9489	0.4244	0.19782	14.9635	0.68133	0.98543		0.05992	0.0643	SE
0.0011	-1.31329	-0.23673								17.4453	0.25017	0.09234	16.4599	0.94319	1.01049
0.0012	-1.36685	-0.23158								18.9416	0.21739	0.07635	17.9562	0.97871	1.01009
0.0013	-1.37972	-0.19918								20.438	0.20582	0.07405	19.4526	1.00882	1.01288
0.0014	-1.30125	-0.2438								21.9343	0.19447	0.06693	20.9489	1.01829	1.00377
0.0015	-1.15344	-0.22266								23.4307	0.17939	0.06488	22.4453	0.99111	0.99555
0.0016	-1.15884	-0.26546								24.927	0.17731	0.06706	23.9416	1.00472	0.99926
0.0017	-1.27634	-0.2792								26.4234	0.17061	0.06961	25.438	0.98814	0.99133
0.0018	-1.39343	-0.40847								27.9197	0.16156	0.06663	26.9343	0.99774	1.0101
0.0019	-1.44367	-0.42039								29.4161	0.16265	0.06631	28.4307	0.98963	1.00676
0.002	-1.47398	-0.4839								30.9124	0.19217	0.27672	29.927	0.99693	0.96638
0.0021	-1.55287	-0.51726								32.4088	0.52443	0.6383	31.4234	0.8439	0.92567
0.0022	-1.57363	-0.55498								33.9051	0.78795	0.77494	32.9197	0.75188	0.89092
0.0023	-1.62429	-0.62321								35.4015	0.8545	0.8469	34.4161	0.70344	0.88072
0.0024	-1.52837	-0.76302								36.8979	0.92159	0.87327	35.9124	0.67779	0.87158
0.0025	-1.48519	-0.92062								38.3942	0.92611	0.89229	37.4088	0.64875	0.85502
0.0026	-1.68781	-0.9478									0.92124	0.89306	38.9051	0.6469	0.8531
0.0027	-1.61266	-0.93829									0.92958	0.9056	40.4015	0.65157	0.8623
0.0028	-1.53045	-0.97347									0.93444	0.90184	41.8979	0.64594	0.85802
0.0029	-1.49308	-1.03589									0.94913	0.91129	43.3942	0.64249	0.84966
0.003	-1.48893	-1.11974												0.92124	0.89306
0.0031	-1.41295	-1.16146												0.92958	0.9056
0.0032	-1.42831	-1.12579												0.93444	0.90184
0.0033	-1.24687	-1.11627												0.94913	0.91129
0.0034	-1.12936	-1.13038
0.0035	-1.1115	-1.06637
0.0036	-1.14513	-1.02016
0.0037	-1.10444	-0.99611
0.0038	-0.98943	-0.97607
0.0039	-0.84161	-1.03776
0.004	-0.84286	-1.02716
0.0041	-0.7702	-1.00311
0.0042	-0.75525	-0.94673
0.0043	-0.73864	-0.83223
0.0044	-0.71539	-0.71663
0.0045	-0.69339	-0.5033
0.0046	-0.70377	-0.26309
0.0047	-0.72245	-0.20017
0.0048	-0.7291	-0.17722
0.0049	-0.84161	-0.18296
0.005	-0.8578	-0.18398
0.0051	-0.95206	-0.12252
0.0052	-1.09281	-0.17949
0.0053	-1.04548	-0.22266
0.0054	-1.15094	-0.32977
0.0055	-1.29792	-0.4336
0.0056	-1.35149	-0.47423
0.0057	-1.27758	-0.5559
0.0058	-1.25142	-0.50388
0.0059	-1.29585	-0.49946
0.006	-1.39052	-0.34535
0.0061	-1.33571	-0.28933
0.0062	-1.34858	-0.25475
0.0063	-1.33197	-0.29647
0.0064	-1.35273	-0.30512
0.0065	-1.36394	-0.31086
0.0066	-1.42706	-0.41797
0.0067	-1.3926	-0.49965
0.0068	-1.28173	-0.52865
0.0069	-1.25599	-0.5878
0.007	-1.23606	-0.58519
0.0071	-1.27634	-0.66723
0.0072	-1.29378	-0.71693
0.0073	-1.26762	-0.80478
0.0074	-1.2618	-0.88319
0.0075	-1.34817	-0.85406
0.0076	-1.39923	-0.84745
0.0077	-1.44325	-1.03776
0.0078	-1.54995	-1.11871
0.0079	-1.60559	-1.19784
0.008	-1.57403	-1.22284
0.0081	-1.55161	-1.33213
0.0082	-1.55245	-1.39165
0.0083	-1.54871	-1.44498
0.0084	-1.44823	-1.44819
0.0085	-1.45114	-1.62941
0.0086	-1.40796	-1.62208
0.0087	-1.35149	-1.64635
0.0088	-1.42166	-1.76109
0.0089	-1.46567	-1.79154
0.009	-1.49723	-1.76858
0.0091	-1.5483	-1.76634
0.0092	-1.47896	-1.69579
0.0093	-1.38305	-1.75567
0.0094	-1.39011	-1.62845
0.0095	-1.43952	-1.55354
0.0096	-1.30043	-1.49062
0.0097	-1.2095	-1.46112
0.0098	-1.22361	-1.29321
0.0099	-1.15469	-1.21685
0.01	-1.09075	-1.16592
0.0101	-1.08618	-1.103
0.0102	-1.06584	-1.04299
0.0103	-1.11234	-1.06181
0.0104	-1.16714	-1.02433
0.0105	-1.21739	-1.02353
0.0106	-1.1933	-0.90358
0.0107	-1.19995	-0.94166
0.0108	-1.26223	-0.94232
0.0109	-1.28382	-0.85433
0.011	-1.29793	-0.8212
0.0111	-1.36686	-0.88399
0.0112	-1.3544	-0.88719
0.0113	-1.35814	-0.92091
0.0114	-1.35814	-0.85218
0.0115	-1.26929	-0.88808
0.0116	-1.2095	-0.87203
0.0117	-1.2207	-0.94062
0.0118	-1.2452	-0.97071
0.0119	-1.17545	-0.979
0.012	-1.15967	-0.93824
0.0121	-1.15469	-0.99921
0.0122	-1.12812	-1.0144
0.0123	-1.13351	-1.02015
0.0124	-1.043	-1.01318
0.0125	-0.9392	-0.9924
0.0126	-0.89851	-0.94983
0.0127	-0.84038	-0.95267
0.0128	-0.85574	-0.81455
0.0129	-0.77229	-0.79595
0.013	-0.71	-0.8333
0.0131	-0.73118	-0.89173
0.0132	-0.72329	-0.82663
0.0133	-0.62987	-0.83165
0.0134	-0.55306	-0.82359
0.0135	-0.52731	-0.8762
0.0136	-0.4995	-0.88486
0.0137	-0.54434	-0.97344
0.0138	-0.61617	-0.94721
0.0139	-0.56261	-0.94823
0.014	-0.58337	-0.94744
0.0141	-0.7507	-1.02221
0.0142	-0.85034	-0.97019
0.0143	-0.85657	-1.0555
0.0144	-0.8956	-1.16624
0.0145	-0.98653	-1.23121
0.0146	-1.1032	-1.21552
0.0147	-1.13351	-1.31064
0.0148	-1.23607	-1.3687
0.0149	-1.18541	-1.4373
0.015	-1.20908	-1.43687
0.0151	-1.20867	-1.35905
0.0152	-1.22901	-1.26416
0.0153	-1.2315	-1.31351
0.0154	-1.30998	-1.24078
0.0155	-1.35233	-1.25524
0.0156	-1.45945	-1.21303
0.0157	-1.56865	-1.21769
0.0158	-1.43661	-1.17039
0.0159	-1.30125	-1.1874
0.016	-1.29419	-1.14519
0.0161	-1.25807	-1.12478
0.0162	-1.17212	-1.00264
0.0163	-1.05587	-1.01275
0.0164	-1.02597	-0.94329
0.0165	-0.91677	-0.90144
0.0166	-0.91968	-0.81745
0.0167	-0.84411	-0.89041
0.0168	-0.852	-0.93612
0.0169	-0.75775	-0.92697
0.017	-0.77478	-0.93272
0.0171	-0.72246	-0.97624
0.0172	-0.70918	-1.06628
0.0173	-0.61285	-1.07929
0.0174	-0.57423	-0.99893
0.0175	-0.62157	-1.04319
0.0176	-0.65644	-0.9919
0.0177	-0.68219	-0.87812
0.0178	-0.7291	-0.87187
0.0179	-0.8902	-0.86127
0.018	-0.95249	-0.83614
0.0181	-0.9255	-0.85205
0.0182	-0.98072	-0.88251
0.0183	-1.00023	-0.9689
0.0184	-0.99359	-0.97792
0.0185	-1.08701	-0.96695
0.0186	-1.13767	-0.95889
0.0187	-1.08244	-0.92904
0.0188	-1.15635	-0.90572
0.0189	-1.09739	-0.81156
0.019	-1.11524	-0.75009
0.0191	-1.1526	-0.82668
0.0192	-1.27135	-0.87893
0.0193	-1.24436	-0.85416
0.0194	-1.27924	-0.85736
0.0195	-1.26305	-0.86311
0.0196	-1.14679	-0.80673
0.0197	-1.17585	-0.7914
0.0198	-1.04423	-0.86109
0.0199	-0.92714	-0.84286
0.02	-0.86528	-0.7872
0.0201	-0.85033	-0.76025
0.0202	-0.84909	-0.69806
0.0203	-0.8466	-0.74341
0.0204	-0.84286	-0.71064
0.0205	-0.76937	-0.73637
0.0206	-0.65187	-0.74756
0.0207	-0.64481	-0.74895
0.0208	-0.67139	-0.79248
0.0209	-0.57548	-0.77243
0.021	-0.5871	-0.81705
0.0211	-0.52856	-0.82534
0.0212	-0.46919	-0.78858
0.0213	-0.35957	-0.66463
0.0214	-0.44552	-0.74957
0.0215	-0.44054	-0.86903
0.0216	-0.47251	-0.9765
0.0217	-0.47127	-1.1243
0.0218	-0.46836	-1.28227
0.0219	-0.56344	-1.42535
0.022	-0.58919	-1.49503
0.0221	-0.54393	-1.56726
0.0222	-0.59002	-1.54722
0.0223	-0.66725	-1.5704
0.0224	-0.64275	-1.56452
0.0225	-0.6195	-1.60841
0.0226	-0.75403	-1.60544
0.0227	-0.84537	-1.621
0.0228	-0.88108	-1.62093
0.0229	-0.85326	-1.69825
0.023	-0.92218	-1.81153
0.0231	-0.93879	-1.90047
0.0232	-1.00356	-2.02575
0.0233	-1.05795	-2.13104
0.0234	-1.06626	-2.26358
0.0235	-1.0048	-2.25261
0.0236	-1.1032	-2.34155
0.0237	-1.05047	-2.2968
0.0238	-1.04673	-2.18084
0.0239	-0.97033	-2.02818
0.024	-0.90266	-1.87371
0.0241	-0.89186	-1.83622
0.0242	-0.90141	-1.91391
0.0243	-0.98362	-2.00939
0.0244	-0.98071	-2.09143
0.0245	-0.98902	-2.05503
0.0246	-0.97947	-2.06586
0.0247	-0.923	-2.04945
0.0248	-0.80135	-2.07554
0.0249	-0.759	-2.09582
0.025	-0.7619	-2.05433
0.0251	-0.79346	-2.01866
0.0252	-0.81754	-1.93322
0.0253	-0.9201	-1.79836
0.0254	-0.9558	-1.78813
0.0255	-0.99442	-1.73138
0.0256	-1.04217	-1.66192
0.0257	-0.94045	-1.44969
0.0258	-0.86073	-1.44635
0.0259	-0.87111	-1.38598
0.026	-0.9608	-1.33214
0.0261	-1.00937	-1.2674
0.0262	-1.03055	-1.15072
0.0263	-1.0812	-1.04929
0.0264	-1.03761	-0.95985
0.0265	-1.02474	-0.85261
0.0266	-1.07664	-0.81076
0.0267	-1.07166	-0.75147
0.0268	-1.09491	-0.71653
0.0269	-1.18086	-0.71683
0.027	-1.20701	-0.75709
0.0271	-1.28009	-0.75665
0.0272	-1.19331	-0.74642
0.0273	-1.19871	-0.72491
0.0274	-1.08411	-0.81059
0.0275	-1.1273	-0.78073
0.0276	-1.15553	-0.80573
0.0277	-1.10944	-0.8162
0.0278	-1.1821	-0.75437
0.0279	-1.30043	-0.56866
0.028	-1.33365	-0.55042
0.0281	-1.34154	-0.54418
0.0282	-1.44202	-0.52014
0.0283	-1.54374	-0.57783
0.0284	-1.64049	-0.50438
0.0285	-1.70443	-0.53374
0.0286	-1.85889	-0.58926
0.0287	-1.97348	-0.66585
0.0288	-2.10012	-0.69848
0.0289	-2.1404	-0.75145
0.029	-2.20932	-0.73322
0.0291	-2.21264	-0.63652
0.0292	-2.11714	-0.62628
0.0293	-2.23838	-0.60913
0.0294	-2.26495	-0.6276
0.0295	-2.25374	-0.51817
0.0296	-2.16198	-0.44508
0.0297	-2.17984	-0.39234
0.0298	-2.23506	-0.4108
0.0299	-2.20683	-0.55242
0.03	-2.18482	-0.72202
0.0301	-2.17652	-0.83675
0.0302	-2.11299	-0.97983
0.0303	-2.00836	-1.17885
0.0304	-1.89833	-1.2707
0.0305	-1.8236	-1.39997
0.0306	-1.74221	-1.37774
0.0307	-1.56077	-1.39511
0.0308	-1.48437	-1.39868
0.0309	-1.50637	-1.37246
0.031	-1.55537	-1.37021
0.0311	-1.62138	-1.36033
0.0312	-1.67411	-1.35772
0.0313	-1.73681	-1.32568
0.0314	-1.67121	-1.24061
0.0315	-1.6571	-1.16352
0.0316	-1.71896	-1.13112
0.0317	-1.74221	-1.0751
0.0318	-1.71232	-0.94715
0.0319	-1.70194	-0.93074
0.032	-1.71024	-0.85474
0.0321	-1.72685	-0.79436
0.0322	-1.75965	-0.70928
0.0323	-1.80367	-0.62566
0.0324	-1.84685	-0.49553
0.0325	-1.87591	-0.42461
0.0326	-1.82692	-0.37332
0.0327	-1.78789	-0.41358
0.0328	-1.83606	-0.44113
0.0329	-1.72686	-0.41454
0.033	-1.57323	-0.43336
0.0331	-1.46154	-0.43402
0.0332	-1.40674	-0.43323
0.0333	-1.4167	-0.50437
0.0334	-1.40798	-0.57805
0.0335	-1.4578	-0.73602
0.0336	-1.45324	-0.84059
0.0337	-1.42002	-0.89611
0.0338	-1.3868	-0.9865
0.0339	-1.45033	-1.11904
0.034	-1.40632	-1.07429
0.0341	-1.35068	-1.08875
0.0342	-1.35026	-1.18496
0.0343	-1.3432	-1.17763
0.0344	-1.25933	-1.11798
0.0345	-1.19456	-1.19748
0.0346	-1.23276	-1.27043
0.0347	-1.24272	-1.34085
0.0348	-1.24438	-1.35168
0.0349	-1.23068	-1.30947
0.035	-1.24064	-1.37989
0.0351	-1.24853	-1.39144
0.0352	-1.26597	-1.48111
0.0353	-1.18334	-1.50212
0.0354	-1.08328	-1.51622
0.0355	-1.03926	-1.50126
0.0356	-0.972	-1.44052
0.0357	-0.95165	-1.47497
0.0358	-0.84577	-1.58643
0.0359	-0.8221	-1.62815
0.036	-0.67844	-1.70219
0.0361	-0.64938	-1.69631
0.0362	-0.63692	-1.79143
0.0363	-0.57755	-1.82661
0.0364	-0.53312	-1.86287
0.0365	-0.53229	-1.99904
0.0366	-0.51692	-1.94157
0.0367	-0.40607	-1.87066
0.0368	-0.38946	-1.86514
0.0369	-0.34005	-1.95155
0.037	-0.25202	-2.03685
0.0371	-0.22587	-2.06185
0.0372	-0.14822	-2.14571
0.0373	-0.05065	-2.10205
0.0374	0.0079	-2.14158
0.0375	0.098	-2.15823
0.0376	0.10589	-2.1142
0.0377	0.1445	-2.07853
0.0378	0.20014	-1.96075
0.0379	-0.07639	-1.90837
0.038	0.0764	-1.8549
0.0381	0.13038	-1.79779
0.0382	0.10838	-1.85222
0.0383	0.13827	-1.81364
0.0384	0.11378	-1.73111
0.0385	0.14077	-1.77354
0.0386	0.17813	-1.66921
0.0387	0.1935	-1.72691
0.0388	0.17232	-1.77262
0.0389	0.1856	-1.70534
0.039	0.15654	-1.58792
0.0391	0.12706	-1.47378
0.0392	0.14865	-1.32766
0.0393	0.11419	-1.2157
0.0394	0.06685	-1.06014
0.0395	0.00706	-0.98995
0.0396	-0.01162	-0.8729
0.0397	-0.05979	-0.80018
0.0398	-0.00789	-0.85315
0.0399	0.04567	-0.95881
0.04	0.27445	-0.93476
0.0401	0.12996	-0.95104
0.0402	0.04401	-0.93644
0.0403	-0.01121	-0.90005
0.0404	-0.0955	-0.86583
0.0405	-0.0847	-0.88756
0.0406	-0.11045	-0.77196
0.0407	-0.2076	-0.78861
0.0408	-0.14325	-0.67737
0.0409	-0.07225	-0.59956
0.041	-0.14325	-0.65253
0.0411	-0.1939	-0.56672
0.0412	-0.18393	-0.4831
0.0413	-0.27777	-0.46414
0.0414	-0.3658	-0.49059
0.0415	-0.40317	-0.6809
0.0416	-0.40109	-0.71607
0.0417	-0.46752	-0.77377
0.0418	-0.404	-0.90485
0.0419	-0.40898	-0.94475
0.042	-0.52274	-0.95304
0.0421	-0.50613	-1.00565
0.0422	-0.51569	-1.08951
0.0423	-0.57008	-1.17663
0.0424	-0.5186	-1.28047
0.0425	-0.38822	-1.36723
0.0426	-0.45964	-1.37371
0.0427	-0.43846	-1.54003
0.0428	-0.28027	-1.56068
0.0429	-0.3521	-1.65652
0.043	-0.453	-1.73238
0.0431	-0.35584	-1.79226
0.0432	-0.28194	-1.89537
0.0433	-0.33841	-2.02137
0.0434	-0.30229	-2.10414
0.0435	-0.19226	-2.09608
0.0436	-0.17316	-1.96377
0.0437	-0.2209	-1.91284
0.0438	-0.17938	-1.91168
0.0439	-0.22132	-1.90944
0.044	-0.24831	-1.85815
0.0441	-0.31765	-1.83773
0.0442	-0.28776	-1.79298
0.0443	-0.33301	-1.70826
0.0444	-0.31308	-1.69112
0.0445	-0.33509	-1.63474
0.0446	-0.50283	-1.57546
0.0447	-0.56262	-1.59973
0.0448	-0.69631	-1.65234
0.0449	-0.82337	-1.80741
0.045	-0.89021	-1.96647
0.0451	-0.9637	-2.0318
0.0452	-1.14182	-2.02301
0.0453	-1.26971	-2.13775
0.0454	-1.2394	-2.25503
0.0455	-1.23483	-2.2546
0.0456	-1.33365	-2.29922
0.0457	-1.40174	-2.38598
0.0458	-1.40673	-2.41897
0.0459	-1.46777	-2.49447
0.046	-1.55703	-2.49441
0.0461	-1.6409	-2.43984
0.0462	-1.58402	-2.43796
0.0463	-1.63301	-2.49203
0.0464	-1.61225	-2.52357
0.0465	-1.61475	-2.44466
0.0466	-1.67454	-2.44278
0.0467	-1.66955	-2.46378
0.0468	-1.57904	-2.52766
0.0469	-1.54499	-2.44839
0.047	-1.5591	-2.36622
0.0471	-1.49807	-2.15834
0.0472	-1.43828	-2.03693
0.0473	-1.37807	-1.92206
0.0474	-1.30416	-1.82572
0.0475	-1.38803	-1.69595
0.0476	-1.46858	-1.7115
0.0477	-1.47439	-1.64423
0.0478	-1.46733	-1.53408
0.0479	-1.44241	-1.44064
0.048	-1.46774	-1.3374
0.0481	-1.40048	-1.27666
0.0482	-1.44117	-1.32237
0.0483	-1.4611	-1.28742
0.0484	-1.49182	-1.25611
0.0485	-1.47521	-1.24696
0.0486	-1.47812	-1.37405
0.0487	-1.44407	-1.39142
0.0488	-1.38511	-1.38772
0.0489	-1.41335	-1.27939
0.049	-1.349	-1.31602
0.0491	-1.37266	-1.29161
0.0492	-1.39301	-1.32933
0.0493	-1.40214	-1.44842
0.0494	-1.36187	-1.57152
0.0495	-1.39924	-1.663
0.0496	-1.4088	-1.7534
0.0497	-1.37517	-1.79584
0.0498	-1.38721	-1.92329
0.0499	-1.42292	-2.04166
0.05	-1.4524	-2.13024
0.0501	-1.43579	-2.21482
0.0502	-1.46278	-2.28015
0.0503	-1.41669	-2.40179
0.0504	-1.30127	-2.51653
0.0505	-1.26847	-2.58949
0.0506	-1.30251	-2.64101
0.0507	-1.33116	-2.5948
0.0508	-1.32867	-2.61072
0.0509	-1.36646	-2.60012
0.051	-1.34404	-2.61095
0.0511	-1.43953	-2.51606
0.0512	-1.45282	-2.51418
0.0513	-1.48271	-2.55444
0.0514	-1.37725	-2.50205
0.0515	-1.45323	-2.49581
0.0516	-1.49641	-2.48593
0.0517	-1.48811	-2.45244
0.0518	-1.5317	-2.45165
0.0519	-1.5425	-2.4069
0.052	-1.52838	-2.44134
0.0521	-1.57737	-2.54591
0.0522	-1.54291	-2.50806
0.0523	-1.57737	-2.52107
0.0524	-1.57198	-2.43999
0.0525	-1.66706	-2.2975
0.0526	-1.70899	-2.17282
0.0527	-1.74055	-2.08956
0.0528	-1.71688	-2.0201
0.0529	-1.64588	-2.04547
0.053	-1.6027	-2.02287
0.0531	-1.56159	-2.00682
0.0532	-1.5699	-2.06343
0.0533	-1.56782	-2.03466
0.0534	-1.52547	-1.94559
0.0535	-1.61806	-1.84198
0.0536	-1.46111	-1.70422
0.0537	-1.43827	-1.51923
0.0538	-1.47481	-1.37784
0.0539	-1.4964	-1.32182
0.054	-1.47107	-1.2698
0.0541	-1.5429	-1.18
0.0542	-1.59398	-0.95577
0.0543	-1.74096	-0.90884
0.0544	-1.70442	-0.80487
0.0545	-1.72642	-0.76811
0.0546	-1.74179	-0.79056
0.0547	-1.79286	-0.79922
0.0548	-1.85888	-0.82458
0.0549	-1.89583	-0.91679
0.055	-2.03492	-0.93344
0.0551	-2.0914	-1.02674
0.0552	-2.22841	-1.05247
0.0553	-2.19021	-1.10653
0.0554	-2.22924	-1.25542
0.0555	-2.2716	-1.33928
0.0556	-2.2226	-1.40606
0.0557	-2.40986	-1.47684
0.0558	-2.39283	-1.61337
0.0559	-2.38245	-1.75391
0.056	-2.35588	-1.72986
0.0561	-2.46425	-1.68511
0.0562	-2.43145	-1.61674
0.0563	-2.38245	-1.69224
0.0564	-2.30813	-1.67728
0.0565	-2.34965	-1.72371
0.0566	-2.38619	-1.68913
0.0567	-2.4439	-1.60224
0.0568	-2.45636	-1.6098
0.0569	-2.43228	-1.64352
0.057	-2.51158	-1.54173
0.0571	-2.48293	-1.47808
0.0572	-2.5315	-1.43551
0.0573	-2.51158	-1.50883
0.0574	-2.44431	-1.42738
0.0575	-2.39449	-1.35174
0.0576	-2.38909	-1.33061
0.0577	-2.43019	-1.36796
0.0578	-2.30521	-1.37988
0.0579	-2.27698	-1.3166
0.058	-2.1873	-1.30927
0.0581	-2.12128	-1.38876
0.0582	-1.88627	-1.48134
0.0583	-1.82898	-1.61315
0.0584	-1.76545	-1.70137
0.0585	-1.73514	-1.75725
0.0586	-1.74261	-1.73538
0.0587	-1.69237	-1.72478
0.0588	-1.6384	-1.81409
0.0589	-1.55868	-1.88232
0.059	-1.45861	-1.91314
0.0591	-1.39882	-1.97556
0.0592	-1.34776	-2.01437
0.0593	-1.1933	-2.0074
0.0594	-1.04549	-1.95683
0.0595	-1.00562	-2.06975
0.0596	-0.99192	-2.14489
0.0597	-1.03635	-2.21567
0.0598	-1.11275	-2.32096
0.0599	-1.065	-2.40845
0.06	-1.06168	-2.521
0.0601	-1.06168	-2.53002
0.0602	-1.07704	-2.50888
0.0603	-1.09947	-2.55568
0.0604	-0.98487	-2.55198
0.0605	-0.98778	-2.57298
0.0606	-1.02349	-2.61615
0.0607	-0.86363	-2.67857
0.0608	-0.91262	-2.74499
0.0609	-0.91511	-2.7798
0.061	-0.99857	-2.74159
0.0611	-1.03926	-2.70846
0.0612	-0.98363	-2.73092
0.0613	-1.03096	-2.7541
0.0614	-1.18418	-2.8078
0.0615	-1.23691	-2.78739
0.0616	-1.2639	-2.75971
0.0617	-1.28424	-2.64085
0.0618	-1.28881	-2.62152
0.0619	-1.30832	-2.49721
0.062	-1.43164	-2.45718
0.0621	-1.57862	-2.32123
0.0622	-1.76712	-2.22998
0.0623	-1.85722	-2.21029
0.0624	-2.02372	-2.0976
0.0625	-2.16489	-2.03069
0.0626	-2.20475	-1.92235
0.0627	-2.19893	-1.80131
0.0628	-2.29775	-1.7006
0.0629	-2.33056	-1.62969
0.063	-2.37789	-1.517
0.0631	-2.41609	-1.4301
0.0632	-2.44598	-1.34611
0.0633	-2.49456	-1.24868
0.0634	-2.53234	-1.24026
0.0635	-2.48168	-1.12611
0.0636	-2.55102	-1.13876
0.0637	-2.62949	-1.02062
0.0638	-2.62783	-0.98241
0.0639	-2.52362	-0.91077
0.064	-2.51698	-0.87292
0.0641	-2.50079	-0.79656
0.0642	-2.37124	-0.7776
0.0643	-2.28031	-0.82585
0.0644	-2.2691	-0.79709
0.0645	-2.24544	-0.8319
0.0646	-2.31312	-0.85399
0.0647	-2.28945	-0.9353
0.0648	-2.19894	-1.00971
0.0649	-2.12254	-1.05179
0.065	-2.08808	-1.08624
0.0651	-2.12836	-1.09489
0.0652	-2.07023	-1.08828
0.0653	-2.09348	-1.10674
0.0654	-2.04158	-1.1797
0.0655	-2.05694	-1.14512
0.0656	-2.06275	-1.21626
0.0657	-2.04905	-1.22382
0.0658	-1.95023	-1.24083
0.0659	-1.91826	-1.2731
0.066	-1.92283	-1.33225
0.0661	-1.90705	-1.38668
0.0662	-1.8676	-1.45164
0.0663	-1.87881	-1.55003
0.0664	-1.81653	-1.68003
0.0665	-1.69779	-1.77115
0.0666	-1.65211	-1.82885
0.0667	-1.62554	-1.80444
0.0668	-1.64215	-1.83962
0.0669	-1.73183	-1.84355
0.067	-1.78249	-1.80388
0.0671	-1.65501	-1.7802
0.0672	-1.52007	-1.92037
0.0673	-1.54499	-1.98097
0.0674	-1.53918	-1.91805
0.0675	-1.55786	-1.89946
0.0676	-1.42126	-1.85397
0.0677	-1.36562	-1.83502
0.0678	-1.36729	-1.85384
0.0679	-1.44161	-1.8981
0.068	-1.47482	-1.90203
0.0681	-1.47026	-1.78607
0.0682	-1.4113	-1.65848
0.0683	-1.43662	-1.65333
0.0684	-1.40673	-1.57806
0.0685	-1.43538	-1.48244
0.0686	-1.46651	-1.39155
0.0687	-1.45862	-1.32826
0.0688	-1.32493	-1.30858
0.0689	-1.17462	-1.31941
0.069	-1.14348	-1.34805
0.0691	-1.1385	-1.46024
0.0692	-1.2232	-1.54301
0.0693	-1.26099	-1.47246
0.0694	-1.19455	-1.504
0.0695	-1.04591	-1.65434
0.0696	-1.04466	-1.68624
0.0697	-1.08037	-1.72142
0.0698	-1.07331	-1.72644
0.0699	-0.94044	-1.76561
0.07	-0.92051	-1.84583
0.0701	-0.88647	-1.79962
0.0702	-0.81131	-1.76323
0.0703	-0.77104	-1.7617
0.0704	-0.8192	-1.72749
0.0705	-0.7698	-1.70526
0.0706	-0.69091	-1.58893
0.0707	-0.6963	-1.6034
0.0708	-0.65063	-1.5997
0.0709	-0.72496	-1.64832
0.071	-0.83581	-1.56832
0.0711	-0.74904	-1.53883
0.0712	-0.86903	-1.44139
0.0713	-0.6988	-1.33706
0.0714	-0.55182	-1.36896
0.0715	-0.49909	-1.27117
0.0716	-0.6606	-1.17192
0.0717	-0.59625	-1.07667
0.0718	-0.58421	-1.11293
0.0719	-0.52816	-1.08525
0.072	-0.5867	-1.06847
0.0721	-0.50449	-1.00882
0.0722	-0.51155	-1.04073
0.0723	-0.49411	-1.2412
0.0724	-0.39155	-1.41552
0.0725	-0.22506	-1.48848
0.0726	-0.16111	-1.66062
0.0727	-0.15862	-1.70706
0.0728	-0.06437	-1.74259
0.0729	-0.01911	-1.79048
0.073	0.01037	-1.79877
0.0731	0.14697	-1.77182
0.0732	0.0797	-1.70273
0.0733	0.21631	-1.7052
0.0734	0.15818	-1.69678
0.0735	0.08926	-1.60116
0.0736	0.07805	-1.54878
0.0737	0.21673	-1.4677
0.0738	0.26946	-1.42585
0.0739	0.27278	-1.27828
0.074	0.31472	-1.12672
0.0741	0.26946	-0.95226
0.0742	0.15445	-0.76691
0.0743	0.21756	-0.67311
0.0744	0.10837	-0.52918
0.0745	0.00208	-0.44519
0.0746	-0.00332	-0.34339
0.0747	-0.07598	-0.19873
0.0748	-0.01951	-0.16015
0.0749	-0.0357	-0.02893
0.075	-0.07349	0.15569
0.0751	-0.05813	0.22697
0.0752	-0.18601	0.25573
0.0753	-0.14657	0.29903
0.0754	-0.07972	0.32889
0.0755	-0.03488	0.35403
0.0756	-0.02408	0.38025
0.0757	-0.0137	0.32764
0.0758	0.03903	0.28956
0.0759	0.00872	0.24312
0.076	0.1283	0.16871
0.0761	0.03321	0.18658
0.0762	0.08262	0.0871
0.0763	0.16733	-0.0458
0.0764	0.19349	-0.11476
0.0765	0.20885	-0.12632
0.0766	0.2595	-0.04414
0.0767	0.20594	0.04929
0.0768	0.20635	0.0163
0.0769	0.20926	-0.00216
0.077	0.18808	-0.0733
0.0771	0.15653	-0.19095
0.0772	0.14366	-0.16291
0.0773	0.2159	-0.09926
0.0774	0.12995	-0.18239
0.0775	0.10919	-0.18087
0.0776	-0.00707	-0.19861
0.0777	-0.027	-0.27956
0.0778	-0.02782	-0.32962
0.0779	-0.15031	-0.44291
0.078	-0.17896	-0.44502
0.0781	-0.25535	-0.42715
0.0782	-0.17854	-0.48522
0.0783	-0.19764	-0.36344
0.0784	-0.08803	-0.2413
0.0785	-0.0544	-0.22997
0.0786	-0.0461	-0.19503
0.0787	-0.0681	-0.24801
0.0788	-0.02866	-0.26574
0.0789	-0.04277	-0.34197
0.079	-0.05896	-0.4865
0.0791	-0.18228	-0.53475
0.0792	-0.16733	-0.57574
0.0793	-0.04982	-0.60146
0.0794	-0.08138	-0.64536
0.0795	-0.07764	-0.68271
0.0796	-0.13369	-0.85158
0.0797	-0.13992	-0.92599
0.0798	-0.11169	-0.97606
0.0799	-0.06186	-1.04248
0.08	0.04859	-0.95849
0.0801	0.00872	-0.91519
0.0802	0.02699	-0.97543
0.0803	0.03571	-1.03313
0.0804	0.05481	-1.0861
0.0805	-0.08013	-1.21392
0.0806	-0.21715	-1.21058
0.0807	-0.14532	-1.21923
0.0808	-0.25535	-1.20754
0.0809	-0.26033	-1.21401
0.081	-0.27237	-1.03556
0.0811	-0.37493	-0.84512
0.0812	-0.31556	-0.73062
0.0813	-0.40483	-0.6172
0.0814	-0.57465	-0.81477
0.0815	-0.57091	-0.79654
0.0816	-0.47417	-0.69184
0.0817	-0.42143	-0.48106
0.0818	-0.46544	-0.39016
0.0819	-0.51651	-0.30872
0.082	-0.64689	-0.22981
0.0821	-0.68924	-0.21085
0.0822	-0.65063	-0.19407
0.0823	-0.66973	-0.08465
0.0824	-0.71166	0.02876
0.0825	-0.67969	0.11857
0.0826	-0.74239	0.25669
0.0827	-0.68675	0.33741
0.0828	-0.76439	0.40178
0.0829	-0.64896	0.45925
0.083	-0.65062	0.48221
0.0831	-0.59125	0.49535
0.0832	-0.57422	0.59133
0.0833	-0.54848	0.55761
0.0834	-0.47831	0.57403
0.0835	-0.38448	0.79607
0.0836	-0.35168	0.75291
0.0837	-0.49243	0.84671
0.0838	-0.50406	0.78756
0.0839	-0.497	0.81051
0.084	-0.49327	0.87379
0.0841	-0.53977	0.99775
0.0842	-0.58959	1.07483
0.0843	-0.59332	1.1254
0.0844	-0.60951	1.1687
0.0845	-0.70667	1.11427
0.0846	-0.78971	1.01988
0.0847	-0.74653	1.00469
0.0848	-0.70003	1.00039
0.0849	-0.63692	0.97503
0.085	-0.67512	0.8672
0.0851	-0.73616	0.80695
0.0852	-0.75277	0.75761
0.0853	-0.65395	0.67194
0.0854	-0.57506	0.73449
0.0855	-0.5925	0.68152
0.0856	-0.59748	0.59803
0.0857	-0.61866	0.61662
0.0858	-0.55554	0.52368
0.0859	-0.61782	0.41149
0.086	-0.52482	0.31492
0.0861	-0.51776	0.11444
0.0862	-0.33632	-0.09621
0.0863	-0.30975	-0.25818
0.0864	-0.28608	-0.43395
0.0865	-0.30061	-0.6199
0.0866	-0.18228	-0.79312
0.0867	-0.1499	-0.89224
0.0868	-0.04236	-1.15411
0.0869	-0.11003	-1.3862
0.087	-0.22172	-1.57687
0.0871	-0.26657	-1.67344
0.0872	-0.25701	-1.76892
0.0873	-0.2786	-1.85133
0.0874	-0.37286	-1.95444
0.0875	-0.49327	-2.14111
0.0876	-0.54475	-2.29871
0.0877	-0.5788	-2.29356
0.0878	-0.54185	-2.37524
0.0879	-0.53355	-2.51105
0.088	-0.43639	-2.40562
0.0881	-0.4559	-2.40883
0.0882	-0.49576	-2.29287
0.0883	-0.49618	-2.23867
0.0884	-0.46628	-2.2277
0.0885	-0.48372	-2.24071
0.0886	-0.57258	-2.18506
0.0887	-0.61659	-2.17736
0.0888	-0.57382	-2.16676
0.0889	-0.66226	-2.16306
0.089	-0.60787	-2.17135
0.0891	-0.52317	-2.15457
0.0892	-0.40151	-2.17666
0.0893	-0.41978	-2.20239
0.0894	-0.37909	-2.29315
0.0895	-0.37535	-2.4969
0.0896	-0.2865	-2.46522
0.0897	-0.19889	-2.37615
0.0898	-0.14325	-2.38298
0.0899	-0.19141	-2.38837
0.09	-0.12415	-2.3378
0.0901	-0.25079	-2.35299
0.0902	-0.2649	-2.31405
0.0903	-0.1449	-2.23151
0.0904	-0.11169	-2.16242
0.0905	-0.06477	-2.09441
0.0906	-0.08594	-1.97155
0.0907	0.01495	-1.9188
0.0908	0.05564	-1.80866
0.0909	0.07225	-1.79006
0.091	0.07308	-1.6741
0.0911	-0.01494	-1.62099
0.0912	-0.06892	-1.62928
0.0913	-0.05647	-1.51804
0.0914	0.08512	-1.47038
0.0915	0.00208	-1.34207
0.0916	0.01993	-1.16907
0.0917	0.03737	-1.15302
0.0918	-0.00208	-1.20309
0.0919	-0.02949	-1.31128
0.092	0.04068	-1.37625
0.0921	0.05978	-1.40815
0.0922	0.17064	-1.45168
0.0923	0.18226	-1.51447
0.0924	0.12912	-1.61322
0.0925	0.03196	-1.67455
0.0926	-0.02119	-1.71517
0.0927	-1.42857e-05	-1.79976
0.0928	-0.00458	-1.80768
0.0929	-0.10091	-1.79272
0.093	-0.13911	-1.82281
0.0931	-0.08306	-1.80566
0.0932	0.02448	-1.73584
0.0933	0.05188	-1.6068
0.0934	0.02905	-1.59656
0.0935	0.00538	-1.55871
0.0936	0.10296	-1.64402
0.0937	0.10213	-1.63378
0.0938	0.06974	-1.65987
0.0939	0.14905	-1.58533
0.094	0.2296	-1.49698
0.0941	0.1777	-1.43842
0.0942	0.11708	-1.43617
0.0943	0.13451	-1.50041
0.0944	0.20427	-1.50361
0.0945	0.16898	-1.53225
0.0946	0.18766	-1.72982
0.0947	0.23084	-1.84056
0.0948	0.22794	-1.94076
0.0949	0.22379	-1.98575
0.095	0.24662	-2.03473
0.0951	0.31015	-1.96345
0.0952	0.32012	-1.94159
0.0953	0.3085	-2.05705
0.0954	0.33175	-2.12129
0.0955	0.31348	-2.13394
0.0956	0.30268	-2.18582
0.0957	0.19265	-2.14797
0.0958	0.26074	-2.15117
0.0959	0.19846	-2.11441
0.096	0.137	-2.21571
0.0961	0.05355	-2.15206
0.0962	-0.01828	-2.15418
0.0963	-0.07391	-2.08508
0.0964	-0.17647	-2.0287
0.0965	-0.19432	-1.95234
0.0966	-0.15861	-1.89233
0.0967	-0.2047	-1.73423
0.0968	-0.25536	-1.65859
0.0969	-0.21218	-1.50557
0.097	-0.25868	-1.45646
0.0971	-0.22131	-1.47092
0.0972	-0.34879	-1.44543
0.0973	-0.43224	-1.42283
0.0974	-0.502	-1.31487
0.0975	-0.5294	-1.21671
0.0976	-0.61742	-1.13126
0.0977	-0.75237	-0.96517
0.0978	-0.72828	-0.80452
0.0979	-0.80343	-0.69437
0.098	-0.72039	-0.60711
0.0981	-0.71914	-0.48679
0.0982	-0.67596	-0.43877
0.0983	-0.64399	-0.36749
0.0984	-0.6058	-0.37215
0.0985	-0.53936	-0.26018
0.0986	-0.61867	-0.28845
0.0987	-0.6577	-0.28185
0.0988	-0.62323	-0.23891
0.0989	-0.65438	-0.28862
0.099	-0.74406	-0.37901
0.0991	-0.76358	-0.34371
0.0992	-0.76773	-0.30259
0.0993	-0.74365	-0.38245
0.0994	-0.6494	-0.51535
0.0995	-0.67555	-0.54689
0.0996	-0.66518	-0.68815
0.0997	-0.66434	-0.81778
0.0998	-0.60414	-0.98302
0.0999	-0.57923	-1.1904
0.1	-0.54975	-1.26517
0.1001	-0.64649	-1.32904
0.1002	-0.76109	-1.31844
0.1003	-0.83084	-1.37214
0.1004	-0.75652	-1.42694
0.1005	-0.79057	-1.49009
0.1006	-0.88358	-1.54706
0.1007	-0.9143	-1.44636
0.1008	-0.97908	-1.43793
0.1009	-1.02724	-1.4266
0.101	-1.01063	-1.2972
0.1011	-1.02059	-1.18414
0.1012	-1.00689	-1.2353
0.1013	-1.07955	-1.33224
0.1014	-1.09034	-1.30493
0.1015	-1.15429	-1.17734
0.1016	-1.06875	-1.21106
0.1017	-1.10114	-1.21099
0.1018	-1.09865	-1.11501
0.1019	-1.1576	-1.14619
0.102	-1.22071	-1.08
0.1021	-1.32493	-1.02071
0.1022	-1.27677	-0.93636
0.1023	-1.19539	-0.86182
0.1024	-1.12148	-0.81743
0.1025	-1.2066	-0.71999
0.1026	-1.14307	-0.64254
0.1027	-1.09241	-0.52695
0.1028	-1.04508	-0.5752
0.1029	-0.96037	-0.51519
0.103	-1.01103	-0.46862
0.1031	-1.08078	-0.5027
0.1032	-1.09573	-0.50263
0.1033	-1.0268	-0.44625
0.1034	-0.90557	-0.32557
0.1035	-0.84204	-0.28082
0.1036	-0.90349	-0.31163
0.1037	-1.01352	-0.17859
0.1038	-0.99151	-0.04229
0.1039	-0.92508	-0.02224
0.104	-0.80923	0.1573
0.1041	-0.76688	0.2689
0.1042	-0.71249	0.26098
0.1043	-0.82999	0.24688
0.1044	-0.79927	0.26474
0.1045	-0.89518	0.27135
0.1046	-0.89767	0.28704
0.1047	-1.00271	0.3238
0.1048	-0.96036	0.25811
0.1049	-1.00437	0.25381
0.105	-1.04548	0.22446
0.1051	-0.99316	0.21944
0.1052	-0.95289	0.29253
0.1053	-0.84244	0.30822
0.1054	-0.90804	0.30683
0.1055	-0.967	0.25749
0.1056	-0.94582	0.24956
0.1057	-0.95205	0.33718
0.1058	-0.90222	0.40592
0.1059	-0.84036	0.386
0.106	-0.83912	0.35918
0.1061	-0.95206	0.37524
0.1062	-0.97946	0.34697
0.1063	-0.90057	0.3216
0.1064	-0.70044	0.27371
0.1065	-0.72826	0.16224
0.1066	-0.71913	0.11617
0.1067	-0.65851	0.05629
0.1068	-0.57713	-0.0054
0.1069	-0.63318	-0.03222
0.107	-0.66474	-0.01798
0.1071	-0.63401	-0.05861
0.1072	-0.63401	-0.0342
0.1073	-0.67138	-0.06356
0.1074	-0.74695	-0.16122
0.1075	-0.65311	-0.18731
0.1076	-0.56426	-0.18506
0.1077	-0.60246	-0.20207
0.1078	-0.53728	-0.29901
0.1079	-0.56717	-0.40139
0.108	-0.62198	-0.38534
0.1081	-0.69131	-0.38128
0.1082	-0.62571	-0.45642
0.1083	-0.63941	-0.53083
0.1084	-0.68135	-0.58853
0.1085	-0.80965	-0.67093
0.1086	-0.85616	-0.72136
0.1087	-0.86322	-0.79686
0.1088	-0.93422	-0.84947
0.1089	-0.95789	-0.87847
0.109	-0.99692	-0.87077
0.1091	-0.97616	-0.88887
0.1092	-0.9936	-0.90952
0.1093	-1.03512	-0.99337
0.1094	-1.04758	-1.05107
0.1095	-1.0509	-1.03284
0.1096	-1.11442	-1.09163
0.1097	-1.27593	-1.10064
0.1098	-1.32866	-1.08205
0.1099	-1.33074	-1.06236
0.11	-1.38056	-0.9682
0.1101	-1.44035	-0.98194
0.1102	-1.44907	-0.95281
0.1103	-1.54914	-0.96691
0.1104	-1.56658	-0.91852
0.1105	-1.58484	-0.80728
0.1106	-1.50429	-0.65208
0.1107	-1.45571	-0.57354
0.1108	-1.47813	-0.47575
0.1109	-1.44367	-0.33436
0.111	-1.47066	-0.24528
0.1111	-1.43287	-0.30697
0.1112	-1.31122	-0.28693
0.1113	-1.34319	-0.18768
0.1114	-1.29544	-0.12984
0.1115	-1.22859	-0.06293
0.1116	-1.19953	-0.03198
0.1117	-1.29586	0.04402
0.1118	-1.1879	0.01865
0.1119	-1.14763	0.00746
0.112	-1.08245	0.02024
0.1121	-1.00813	-0.05308
0.1122	-0.99567	-0.08825
0.1123	-1.02224	-0.10962
0.1124	-0.85533	-0.11573
0.1125	-0.79595	-0.16507
0.1126	-0.86945	-0.20206
0.1127	-0.98156	-0.28338
0.1128	-0.95374	-0.32872
0.1129	-0.86447	-0.38751
0.113	-0.7532	-0.48663
0.1131	-0.666	-0.56104
0.1132	-0.68136	-0.58749
0.1133	-0.76606	-0.73711
0.1134	-0.7918	-0.91615
0.1135	-0.70752	-1.08211
0.1136	-0.72579	-1.20993
0.1137	-0.65105	-1.25019
0.1138	-0.48081	-1.32242
0.1139	-0.49369	-1.30419
0.114	-0.5078	-1.28813
0.1141	-0.60413	-1.31095
0.1142	-0.67886	-1.27274
0.1143	-0.61783	-1.23089
0.1144	-0.50572	-1.25553
0.1145	-0.60662	-1.19443
0.1146	-0.56676	-1.11443
0.1147	-0.44428	-1.09911
0.1148	-0.31431	-1.08633
0.1149	-0.3193	-1.0245
0.115	-0.33383	-1.04296
0.1151	-0.47084	-0.98985
0.1152	-0.5435	-0.9985
0.1153	-0.5788	-0.91524
0.1154	-0.4858	-0.81091
0.1155	-0.40566	-0.68731
0.1156	-0.42352	-0.60005
0.1157	-0.45217	-0.56656
0.1158	-0.48705	-0.47894
0.1159	-0.51819	-0.44
0.116	-0.54268	-0.33966
0.1161	-0.51279	-0.29236
0.1162	-0.4858	-0.18948
0.1163	-0.31889	-0.15417
0.1164	-0.26948	-0.12395
0.1165	-0.25578	-0.04396
0.1166	-0.15654	-0.04026
0.1167	-0.1582	-0.07725
0.1168	-0.16526	-0.16656
0.1169	-0.2375	-0.19882
0.117	-0.25287	-0.19222
0.1171	-0.23419	-0.2005
0.1172	-0.22215	-0.31125
0.1173	-0.20139	-0.27994
0.1174	-0.17648	-0.26425
0.1175	-0.29689	-0.25074
0.1176	-0.35335	-0.20998
0.1177	-0.431	-0.24116
0.1178	-0.4447	-0.21675
0.1179	-0.45425	-0.37654
0.118	-0.46837	-0.47892
0.1181	-0.43598	-0.56532
0.1182	-0.41605	-0.60159
0.1183	-0.42934	-0.68435
0.1184	-0.49328	-0.74387
0.1185	-0.48747	-0.82736
0.1186	-0.55722	-0.90649
0.1187	-0.66932	-0.96237
0.1188	-0.73783	-0.97284
0.1189	-0.80842	-0.83581
0.119	-0.77396	-0.7362
0.1191	-0.72164	-0.73613
0.1192	-0.71209	-0.61472
0.1193	-0.64233	-0.50058
0.1194	-0.66558	-0.458
0.1195	-0.56302	-0.40526
0.1196	-0.49534	-0.37685
0.1197	-0.39237	-0.47778
0.1198	-0.37078	-0.37781
0.1199	-0.25826	-0.42134
0.12	-0.29314	-0.3239
0.1201	-0.29937	-0.31003
0.1202	-0.28525	-0.33685
0.1203	-0.33632	-0.41889
0.1204	-0.30477	-0.49839
0.1205	-0.24913	-0.57607
0.1206	-0.32802	-0.64466
0.1207	-0.25744	-0.75105
0.1208	-0.13578	-0.78912
0.1209	-0.05191	-0.849
0.121	0.04982	-0.99862
0.1211	0.08304	-1.07593
0.1212	0.07224	-1.04753
0.1213	0.071	-1.10813
0.1214	0.13037	-1.17237
0.1215	0.24704	-1.23952
0.1216	0.17313	-1.43818
0.1217	0.14614	-1.48716
0.1218	0.0303	-1.4355
0.1219	0.02324	-1.47504
0.122	-0.00209	-1.45462
0.1221	0.05562	-1.38044
0.1222	0.12372	-1.28919
0.1223	0.05812	-1.21791
0.1224	0.17147	-1.16626
0.1225	0.18144	-1.06156
0.1226	0.1723	-0.97103
0.1227	0.18809	-0.83545
0.1228	0.17438	-0.71476
0.1229	0.0685	-0.68164
0.123	-0.00126	-0.62744
0.1231	0.04524	-0.57069
0.1232	-0.07849	-0.48271
0.1233	-0.13538	-0.45212
0.1234	-0.13911	-0.45206
0.1235	-0.28319	-0.49813
0.1236	-0.47169	-0.40978
0.1237	-0.46795	-0.29818
0.1238	-0.50116	-0.35224
0.1239	-0.4721	-0.39577
0.124	-0.46047	-0.42368
0.1241	-0.46212	-0.41489
0.1242	-0.49202	-0.48349
0.1243	-0.56966	-0.61131
0.1244	-0.51651	-0.68681
0.1245	-0.57506	-0.71181
0.1246	-0.64273	-0.71646
0.1247	-0.71249	-0.69896
0.1248	-0.75982	-0.72142
0.1249	-0.77519	-0.71517
0.125	-0.70211	-0.68931
0.1251	-0.68924	-0.63402
0.1252	-0.78017	-0.57655
0.1253	-0.71913	-0.64878
0.1254	-0.67968	-0.69086
0.1255	-0.72203	-0.63702
0.1256	-0.68508	-0.55085
0.1257	-0.54266	-0.53734
0.1258	-0.49367	-0.49404
0.1259	-0.39111	-0.39916
0.126	-0.40357	-0.31807
0.1261	-0.41354	-0.19194
0.1262	-0.4563	-0.10177
0.1263	-0.48661	-0.0621
0.1264	-0.497	0.08946
0.1265	-0.58668	0.1829
0.1266	-0.5925	0.15753
0.1267	-0.55803	0.2259
0.1268	-0.61326	0.24014
0.1269	-0.58917	0.25546
0.127	-0.58377	0.34526
0.1271	-0.71705	0.38784
0.1272	-0.7677	0.38573
0.1273	-0.75816	0.38943
0.1274	-0.73657	0.42146
0.1275	-0.781	0.39901
0.1276	-0.84868	0.40489
0.1277	-0.94044	0.35954
0.1278	-1.02929	0.26805
0.1279	-1.06541	0.21326
0.128	-1.18209	0.18317
0.1281	-1.12437	0.15418
0.1282	-1.14845	0.06996
0.1283	-1.15842	0.05331
0.1284	-1.19952	0.06355
0.1285	-1.24603	0.11739
0.1286	-1.1962	0.12872
0.1287	-1.17337	0.2563
0.1288	-1.15136	0.22585
0.1289	-1.08908	0.20848
0.129	-1.05794	0.27358
0.1291	-1.13144	0.29363
0.1292	-0.95165	0.4303
0.1293	-0.9093	0.46052
0.1294	-0.94584	0.54596
0.1295	-0.90889	0.60852
0.1296	-0.8848	0.75245
0.1297	-0.76273	0.76524
0.1298	-0.71042	0.8732
0.1299	-0.6606	1.01423
0.13	-0.69672	1.15708
0.1301	-0.63984	1.15424
0.1302	-0.65479	1.1841
0.1303	-0.59417	1.18053
0.1304	-0.60704	1.16825
0.1305	-0.49535	1.17558
0.1306	-0.47708	1.18219
0.1307	-0.52316	1.16954
0.1308	-0.568	1.0588
0.1309	-0.568	1.03815
0.131	-0.6062	1.02442
0.1311	-0.65395	0.97035
0.1312	-0.67222	0.96024
0.1313	-0.80218	0.79029
0.1314	-0.82501	0.7602
0.1315	-0.82833	0.71195
0.1316	-0.75733	0.66624
0.1317	-0.73283	0.52716
0.1318	-0.73532	0.54684
0.1319	-0.71207	0.42593
0.132	-0.7046	0.32027
0.1321	-0.63152	0.25204
0.1322	-0.65934	0.28371
0.1323	-0.65395	0.22892
0.1324	-0.64357	0.30565
0.1325	-0.6307	0.36748
0.1326	-0.69049	0.40533
0.1327	-0.6199	0.22846
0.1328	-0.61284	0.11954
0.1329	-0.6253	0.09454
0.133	-0.61492	0.03175
0.1331	-0.49492	-0.06518
0.1332	-0.42641	-0.19845
0.1333	-0.3579	-0.42036
0.1334	-0.32801	-0.48278
0.1335	-0.29189	-0.59062
0.1336	-0.26781	-0.64286
0.1337	-0.4422	-0.68676
0.1338	-0.44095	-0.646
0.1339	-0.40732	-0.62014
0.134	-0.3878	-0.49146
0.1341	-0.33383	-0.44126
0.1342	-0.34296	-0.40922
0.1343	-0.42559	-0.3038
0.1344	-0.41271	-0.26268
0.1345	-0.39237	-0.30439
0.1346	-0.39652	-0.38352
0.1347	-0.3957	-0.51425
0.1348	-0.39653	-0.38194
0.1349	-0.32179	-0.27651
0.135	-0.32719	-0.11913
0.1351	-0.3903	-0.03405
0.1352	-0.45923	0.05466
0.1353	-0.53604	0.14156
0.1354	-0.52151	0.25134
0.1355	-0.51694	0.26158
0.1356	-0.50906	0.37064
0.1357	-0.50034	0.33256
0.1358	-0.44262	0.26977
0.1359	-0.51238	0.22152
0.136	-0.66351	0.13403
0.1361	-0.71334	0.06398
0.1362	-0.7997	0.07277
0.1363	-0.84288	0.02452
0.1364	-0.77894	-0.07496
0.1365	-0.79555	-0.17916
0.1366	-0.92011	-0.24449
0.1367	-1.01104	-0.28185
0.1368	-1.11235	-0.27451
0.1369	-1.20909	-0.3482
0.137	-1.33739	-0.3761
0.1371	-1.46942	-0.47413
0.1372	-1.50098	-0.53946
0.1373	-1.54956	-0.5848
0.1374	-1.60229	-0.58074
0.1375	-1.7173	-0.59521
0.1376	-1.78913	-0.61803
0.1377	-1.71771	-0.66664
0.1378	-1.71107	-0.73488
0.1379	-1.64505	-0.85724
0.138	-1.54458	-0.99959
0.1381	-1.47897	-1.02496
0.1382	-1.46236	-1.07357
0.1383	-1.45489	-1.23954
0.1384	-1.45489	-1.33102
0.1385	-1.40216	-1.36075
0.1386	-1.41461	-1.30873
0.1387	-1.39883	-1.31738
0.1388	-1.31952	-1.38452
0.1389	-1.19455	-1.38845
0.139	-1.1605	-1.37276
0.1391	-1.0239	-1.40067
0.1392	-0.82668	-1.47544
0.1393	-0.75194	-1.48882
0.1394	-0.73866	-1.53925
0.1395	-0.54185	-1.54282
0.1396	-0.47667	-1.5046
0.1397	-0.28027	-1.43733
0.1398	-0.31266	-1.46596
0.1399	-0.33176	-1.4826
0.14	-0.39362	-1.34012
0.1401	-0.40151	-1.26376
0.1402	-0.35874	-1.26115
0.1403	-0.40068	-1.22875
0.1404	-0.32802	-1.18981
0.1405	-0.35335	-1.12762
0.1406	-0.44802	-1.15516
0.1407	-0.46629	-1.13911
0.1408	-0.40193	-1.07801
0.1409	-0.34173	-1.09066
0.141	-0.44553	-1.14581
0.1411	-0.48954	-1.15882
0.1412	-0.54974	-1.17002
0.1413	-0.61991	-1.0239
0.1414	-0.68053	-0.97443
0.1415	-0.69382	-0.84684
0.1416	-0.81838	-0.82025
0.1417	-0.80675	-0.84307
0.1418	-0.9255	-0.86081
0.1419	-0.92219	-0.84221
0.142	-0.97491	-0.71099
0.1421	-1.01477	-0.62083
0.1422	-0.96246	-0.61495
0.1423	-1.01851	-0.57019
0.1424	-0.93464	-0.71472
0.1425	-0.83499	-0.80439
0.1426	-0.75859	-0.87698
0.1427	-0.72993	-0.89218
0.1428	-0.7316	-0.95569
0.1429	-0.70544	-1.06171
0.143	-0.666	-0.95446
0.1431	-0.62364	-0.88828
0.1432	-0.54434	-0.8962
0.1433	-0.58004	-0.84563
0.1434	-0.53894	-0.9542
0.1435	-0.41687	-0.98465
0.1436	-0.3658	-1.09611
0.1437	-0.32635	-1.20068
0.1438	-0.29895	-1.29035
0.1439	-0.23002	-1.35241
0.144	-0.24995	-1.50638
0.1441	-0.17605	-1.64219
0.1442	-0.08013	-1.82269
0.1443	-0.1449	-1.90836
0.1444	-0.10463	-2.08922
0.1445	-0.08221	-2.05246
0.1446	-0.2213	-1.92124
0.1447	-0.33715	-1.88993
0.1448	-0.2101	-1.87642
0.1449	-0.05273	-1.87562
0.145	0.01869	-1.79381
0.1451	-0.02781	-1.77631
0.1452	-0.00249	-1.71484
0.1453	-0.02325	-1.63775
0.1454	0.09176	-1.69836
0.1455	0.1474	-1.67795
0.1456	0.1748	-1.65209
0.1457	0.18518	-1.56483
0.1458	0.17106	-1.43361
0.1459	0.19349	-1.32164
0.146	0.1611	-1.24201
0.1461	0.19847	-1.10897
0.1462	0.19764	-1.01154
0.1463	0.17605	-0.91774
0.1464	0.1856	-0.82213
0.1465	0.20885	-0.68219
0.1466	0.12207	-0.58584
0.1467	0.18642	-0.53419
0.1468	0.25576	-0.56355
0.1469	0.13286	-0.56494
0.147	-0.0054	-0.46351
0.1471	-0.11419	-0.42311
0.1472	-0.16485	-0.38526
0.1473	-0.13786	-0.33361
0.1474	-0.12623	-0.37241
0.1475	-0.19806	-0.32839
0.1476	-0.28484	-0.35266
0.1477	-0.38615	-0.33625
0.1478	-0.36248	-0.40775
0.1479	-0.33259	-0.4422
0.148	-0.34629	-0.49118
0.1481	-0.40566	-0.46858
0.1482	-0.50364	-0.39477
0.1483	-0.497	-0.35038
0.1484	-0.46461	-0.30526
0.1485	-0.5053	-0.25615
0.1486	-0.49534	-0.24591
0.1487	-0.47707	-0.22913
0.1488	-0.59457	-0.27193
0.1489	-0.47831	-0.2388
0.149	-0.44261	-0.22711
0.1491	-0.36455	-0.16928
0.1492	-0.4044	-0.21753
0.1493	-0.34379	-0.31047
0.1494	-0.34835	-0.46299
0.1495	-0.27403	-0.56174
0.1496	-0.27278	-0.61072
0.1497	-0.16192	-0.55216
0.1498	-0.1092	-0.57971
0.1499	-0.12788	-0.56983
0.15	-0.20137	-0.48148
0.1501	-0.19182	-0.42619
0.1502	-0.21051	-0.44611
0.1503	-0.16609	-0.41007
0.1504	-0.1117	-0.46922
0.1505	-0.14201	-0.50476
0.1506	-0.1034	-0.45347
0.1507	-0.15031	-0.44722
0.1508	-0.14616	-0.47368
0.1509	-0.04734	-0.37625
0.151	-0.19142	-0.26864
0.1511	-0.26242	-0.20717
0.1512	-0.3683	-0.2656
0.1513	-0.25827	-0.2263
0.1514	-0.1852	-0.17791
0.1515	-0.14741	0.00308
0.1516	-0.19973	0.08308
0.1517	-0.12956	0.2252
0.1518	-0.16153	0.23834
0.1519	-0.18354	0.21661
0.152	-0.27322	0.21922
0.1521	-0.23087	0.05072
0.1522	-0.2616	-0.00335
0.1523	-0.20014	-0.03489
0.1524	-0.10963	-0.13473
0.1525	-0.13828	-0.11469
0.1526	-0.13661	-0.03578
0.1527	-0.11917	-0.02227
0.1528	-0.14491	-0.01821
0.1529	-0.05108	0.04907
0.153	-0.08305	0.06875
0.1531	-0.03655	0.10116
0.1532	0.0137	0.13792
0.1533	0.10255	0.20338
0.1534	0.08968	0.28773
0.1535	0.0465	0.37354
0.1536	0.02408	0.35217
0.1537	0.05937	0.47649
0.1538	-0.01204	0.44567
0.1539	-0.07308	0.45591
0.154	-0.08346	0.52573
0.1541	-0.00374	0.57303
0.1542	0.01869	0.64285
0.1543	0.03529	0.66617
0.1544	0.0764	0.67241
0.1545	0.0602	0.65976
0.1546	0.08262	0.72159
0.1547	0.03861	0.6777
0.1548	0.01287	0.61346
0.1549	0.03322	0.60481
0.155	0.04526	0.59398
0.1551	-0.00705	0.55626
0.1552	0.01828	0.47858
0.1553	0.05232	0.41398
0.1554	0.05315	0.31922
0.1555	0.06934	0.2568
0.1556	0.05273	0.16968
0.1557	0.071	0.19372
0.1558	0.14781	0.12185
0.1559	0.17189	0.13246
0.156	0.17812	0.21717
0.1561	0.15736	0.30044
0.1562	0.16608	0.32521
0.1563	0.16981	0.40738
0.1564	0.27154	0.50118
0.1565	0.24746	0.56737
0.1566	0.2184	0.67352
0.1567	0.13037	0.60057
0.1568	0.23791	0.53742
0.1569	0.32302	0.50333
0.157	0.36122	0.59677
0.1571	0.31222	0.61282
0.1572	0.36412	0.62779
0.1573	0.39817	0.60351
0.1574	0.39443	0.5974
0.1575	0.39443	0.58984
0.1576	0.42848	0.52597
0.1577	0.42267	0.53911
0.1578	0.43471	0.44436
0.1579	0.37741	0.35141
0.158	0.40399	0.28936
0.1581	0.48288	0.22548
0.1582	0.52689	0.11946
0.1583	0.57879	0.07448
0.1584	0.54682	-0.03771
0.1585	0.51277	-0.09795
0.1586	0.45464	-0.14257
0.1587	0.47872	-0.21589
0.1588	0.46212	-0.23981
0.1589	0.46336	-0.17471
0.159	0.35998	-0.14049
0.1591	0.34379	-0.23415
0.1592	0.30476	-0.18105
0.1593	0.2977	-0.2224
0.1594	0.32843	-0.12896
0.1595	0.32718	-0.1427
0.1596	0.30767	-0.16588
0.1597	0.15944	-0.19125
0.1598	0.26614	-0.17883
0.1599	0.17106	-0.18712
0.16	0.11958	-0.07079
0.1601	0.14117	-0.07726
0.1602	0.04941	-0.09827
0.1603	0.04152	-0.17304
0.1604	-0.00623	-0.2282
0.1605	0.00664	-0.19689
0.1606	-0.0328	-0.22116
0.1607	0.04734	-0.20874
0.1608	0.09093	-0.21158
0.1609	0.1557	-0.12759
0.161	0.09675	-0.1446
0.1611	0.12955	-0.11837
0.1612	0.18975	-0.14737
0.1613	0.25535	-0.23595
0.1614	0.32594	-0.28457
0.1615	0.27445	-0.37787
0.1616	0.28234	-0.3313
0.1617	0.20844	-0.20771
0.1618	0.2728	-0.14515
0.1619	0.15945	-0.11566
0.162	0.21633	-0.05456
0.1621	0.2292	-0.09191
0.1622	0.15114	-0.13907
0.1623	0.09799	-0.10268
0.1624	0.10547	0.02745
0.1625	0.12373	0.16158
0.1626	0.11958	0.22305
0.1627	0.0627	0.3034
0.1628	0.02865	0.25697
0.1629	-0.13494	0.21598
0.163	-0.18352	0.13794
0.1631	-0.16899	0.14963
0.1632	-0.25618	0.22962
0.1633	-0.306	0.2831
0.1634	-0.37576	0.24683
0.1635	-0.5381	0.30139
0.1636	-0.55679	0.36068
0.1637	-0.59167	0.41742
0.1638	-0.61202	0.38552
0.1639	-0.67222	0.44008
0.164	-0.666	0.38456
0.1641	-0.70254	0.36792
0.1642	-0.7071	0.47443
0.1643	-0.6523	0.60711
0.1644	-0.65769	0.53669
0.1645	-0.69963	0.51823
0.1646	-0.69838	0.51466
0.1647	-0.70129	0.48567
0.1648	-0.65562	0.43342
0.1649	-0.55929	0.53666
0.165	-0.56054	0.62792
0.1651	-0.58628	0.67013
0.1652	-0.72289	0.48527
0.1653	-0.60165	0.23902
0.1654	-0.5049	0.14681
0.1655	-0.48373	0.16141
0.1656	-0.3712	0.06701
0.1657	-0.42767	-0.08151
0.1658	-0.36912	-0.19116
0.1659	-0.26532	-0.36439
0.166	-0.21923	-0.48494
0.1661	-0.27321	-0.543
0.1662	-0.28816	-0.6839
0.1663	-0.262	-0.83497
0.1664	-0.29023	-1.0151
0.1665	-0.24871	-1.07316
0.1666	-0.17564	-1.22314
0.1667	-0.12374	-1.33533
0.1668	-0.1038	-1.44244
0.1669	-0.09218	-1.5332
0.167	-0.23916	-1.67918
0.1671	-0.13951	-1.69037
0.1672	-0.04733	-1.73136
0.1673	0.10879	-1.57108
0.1674	0.07723	-1.50416
0.1675	-0.02284	-1.41945
0.1676	0.11086	-1.34926
0.1677	0.07473	-1.25946
0.1678	0.08179	-1.15476
0.1679	-0.02866	-1.20338
0.168	-0.08014	-1.1143
0.1681	-0.09301	-1.13494
0.1682	-0.11959	-1.11707
0.1683	-0.06851	-1.07268
0.1684	-0.13536	-1.14273
0.1685	-0.07059	-1.07945
0.1686	-0.0955	-1.02925
0.1687	-0.12125	-1.08113
0.1688	-0.24166	-1.05309
0.1689	-0.29065	-1.02578
0.169	-0.29896	-0.9723
0.1691	-0.27737	-1.00639
0.1692	-0.30477	-1.06663
0.1693	-0.34795	-1.09308
0.1694	-0.38366	-1.13116
0.1695	-0.43888	-1.05371
0.1696	-0.45507	-1.11359
0.1697	-0.65271	-1.23741
0.1698	-0.67098	-1.32018
0.1699	-0.61534	-1.33355
0.17	-0.57009	-1.23757
0.1701	-0.5431	-1.16266
0.1702	-0.50199	-1.0151
0.1703	-0.44345	-1.0034
0.1704	-0.45424	-1.02368
0.1705	-0.43847	-0.91281
0.1706	-0.47584	-0.87532
0.1707	-0.43764	-0.84219
0.1708	-0.51694	-0.65175
0.1709	-0.56345	-0.54379
0.171	-0.60455	-0.41583
0.1711	-0.59417	-0.35764
0.1712	-0.63984	-0.23078
0.1713	-0.72455	-0.13771
0.1714	-0.73576	-0.000311219
0.1715	-0.69548	0.10512
0.1716	-0.5622	0.13207
0.1717	-0.56345	0.24294
0.1718	-0.4804	0.39959
0.1719	-0.4584	0.47014
0.172	-0.5269	0.5029
0.1721	-0.46628	0.49244
0.1722	-0.43514	0.44636
0.1723	-0.39652	0.34834
0.1724	-0.39237	0.35894
0.1725	-0.34213	0.38008
0.1726	-0.32096	0.38451
0.1727	-0.35999	0.31627
0.1728	-0.33715	0.25167
0.1729	-0.27902	0.17435
0.173	-0.15487	0.10285
0.1731	-0.09508	0.04551
0.1732	-0.1146	0.04449
0.1733	-0.02699	0.01331
0.1734	0.04485	-0.08653
0.1735	0.06436	-0.14059
0.1736	0.06851	-0.20483
0.1737	-0.00498	-0.14155
0.1738	0.00125	-0.14185
0.1739	0.02866	-0.25259
0.174	0.01246	-0.21437
0.1741	-0.00539	-0.22048
0.1742	-0.0382	-0.24258
0.1743	-0.09674	-0.32571
0.1744	-0.08969	-0.30602
0.1745	-0.13577	-0.30305
0.1746	-0.18269	-0.22887
0.1747	-0.23251	-0.33162
0.1748	-0.09964	-0.29267
0.1749	-0.11667	-0.24611
0.175	-0.1694	-0.24095
0.1751	-0.24496	-0.23362
0.1752	-0.2487	-0.23573
0.1753	-0.24662	-0.26291
0.1754	-0.31223	-0.22942
0.1755	-0.32967	-0.16142
0.1756	-0.45299	-0.25799
0.1757	-0.47375	-0.27645
0.1758	-0.44551	-0.43006
0.1759	-0.41022	-0.52009
0.176	-0.49285	-0.4797
0.1761	-0.48123	-0.57264
0.1762	-0.43722	-0.59837
0.1763	-0.44095	-0.56342
0.1764	-0.4177	-0.49324
0.1765	-0.48206	-0.48808
0.1766	-0.51652	-0.49601
0.1767	-0.66475	-0.44072
0.1768	-0.70129	-0.3204
0.1769	-0.8599	-0.24586
0.177	-0.93546	-0.24543
0.1771	-0.94294	-0.20067
0.1772	-1.00937	-0.18426
0.1773	-1.06999	-0.20126
0.1774	-1.21988	-0.22445
0.1775	-1.26057	-0.25599
0.1776	-1.25518	-0.30424
0.1777	-1.18418	-0.31616
0.1778	-1.23608	-0.34189
0.1779	-1.22528	-0.39886
0.178	-1.25974	-0.45438
0.1781	-1.26763	-0.50917
0.1782	-1.26763	-0.55597
0.1783	-1.26223	-0.6075
0.1784	-1.28756	-0.70734
0.1785	-1.3598	-0.76685
0.1786	-1.4445	-0.78059
0.1787	-1.35607	-0.74964
0.1788	-1.27344	-0.86583
0.1789	-1.18334	-0.95405
0.179	-1.18625	-1.02156
0.1791	-1.13103	-0.99061
0.1792	-1.11442	-1.08101
0.1793	-0.97616	-1.12381
0.1794	-0.87568	-1.12738
0.1795	-0.73825	-1.18326
0.1796	-0.67846	-1.22279
0.1797	-0.61618	-1.19039
0.1798	-0.56095	-1.11076
0.1799	-0.59417	-1.13213
0.18	-0.69672	-1.04559
0.1801	-0.7287	-1.06841
0.1802	-0.71748	-1.16499
0.1803	-0.6743	-1.17291
0.1804	-0.67014	-1.2495
0.1805	-0.6033	-1.23309
0.1806	-0.52565	-1.16036
0.1807	-0.43182	-1.22787
0.1808	-0.46877	-1.24487
0.1809	-0.30809	-1.36361
0.181	-0.26532	-1.3352
0.1811	-0.24165	-1.41361
0.1812	-0.22255	-1.44261
0.1813	-0.17647	-1.35208
0.1814	-0.11626	-1.33821
0.1815	-0.14532	-1.33596
0.1816	-0.15155	-1.20329
0.1817	-0.20927	-1.14691
0.1818	-0.34379	-1.13304
0.1819	-0.43804	-1.19219
0.182	-0.40026	-1.11183
0.1821	-0.355	-1.14555
0.1822	-0.27155	-1.10443
0.1823	-0.24082	-1.05713
0.1824	-0.21509	-0.99967
0.1825	-0.17398	-0.95455
0.1826	-0.20263	-0.96829
0.1827	-0.16194	-0.98348
0.1828	-0.11294	-0.88278
0.1829	-0.11668	-0.88634
0.183	-0.20388	-0.77438
0.1831	-0.24415	-0.81209
0.1832	-0.13952	-0.7895
0.1833	-0.14491	-0.70224
0.1834	-0.14118	-0.76939
0.1835	-0.25577	-0.80056
0.1836	-0.25203	-0.75254
0.1837	-0.2346	-0.80406
0.1838	-0.13868	-0.70917
0.1839	-0.05066	-0.63209
0.184	-0.05315	-0.44928
0.1841	-0.0108	-0.38563
0.1842	0.05273	-0.25877
0.1843	-0.0357	-0.12537
0.1844	-0.11335	-0.01668
0.1845	-0.17438	0.05351
0.1846	-0.1611	0.17855
0.1847	-0.13992	0.30178
0.1848	-0.15072	0.42501
0.1849	-0.19431	0.45341
0.185	-0.14989	0.50616
0.1851	-0.24206	0.62611
0.1852	-0.26988	0.73336
0.1853	-0.32428	0.81698
0.1854	-0.35625	0.81923
0.1855	-0.4314	0.91376
0.1856	-0.41313	0.94434
0.1857	-0.33964	0.98728
0.1858	-0.32096	1.02985
0.1859	-0.36248	0.90966
0.186	-0.37452	0.85814
0.1861	-0.28857	0.80953
0.1862	-0.333	0.75437
0.1863	-0.42186	0.77878
0.1864	-0.382	0.76068
0.1865	-0.33799	0.8454
0.1866	-0.38241	0.89705
0.1867	-0.37162	0.91347
0.1868	-0.38657	0.9139
0.1869	-0.40151	0.91215
0.187	-0.42684	0.95291
0.1871	-0.44429	0.99911
0.1872	-0.4119	0.97629
0.1873	-0.45549	0.92768
0.1874	-0.54227	0.88814
0.1875	-0.6087	0.73889
0.1876	-0.6004	0.63614
0.1877	-0.59043	0.57772
0.1878	-0.64482	0.47751
0.1879	-0.6361	0.41364
0.188	-0.66434	0.44132
0.1881	-0.64233	0.37672
0.1882	-0.68385	0.31429
0.1883	-0.7071	0.34161
0.1884	-0.65063	0.21016
0.1885	-0.6988	0.09833
0.1886	-0.61866	-0.01314
0.1887	-0.56136	-0.05703
0.1888	-0.60371	-0.10165
0.1889	-0.59624	-0.14773
0.189	-0.66641	-0.25556
0.1891	-0.6307	-0.31798
0.1892	-0.69256	-0.39748
0.1893	-0.57921	-0.44936
0.1894	-0.52524	-0.48345
0.1895	-0.47375	-0.39292
0.1896	-0.41438	-0.30457
0.1897	-0.30102	-0.25
0.1898	-0.3604	-0.20089
0.1899	-0.33009	-0.17103
0.19	-0.33009	-0.14553
0.1901	-0.28275	-0.06118
0.1902	-0.34296	-0.02442
0.1903	-0.30725	0.03886
0.1904	-0.28441	0.02403
0.1905	-0.33507	0.10475
0.1906	-0.3085	0.22944
0.1907	-0.41853	0.2553
0.1908	-0.48205	0.25791
0.1909	-0.51444	0.30484
0.191	-0.58793	0.40627
0.1911	-0.64896	0.42196
0.1912	-0.7482	0.46235
0.1913	-0.7648	0.47768
0.1914	-0.77768	0.51698
0.1915	-0.75899	0.57263
0.1916	-0.71871	0.51275
0.1917	-0.66889	0.55533
0.1918	-0.64938	0.63024
0.1919	-0.52481	0.63975
0.192	-0.55305	0.61475
0.1921	-0.55056	0.55778
0.1922	-0.54019	0.4365
0.1923	-0.58752	0.46454
0.1924	-0.52482	0.50639
0.1925	-0.42019	0.5268
0.1926	-0.42558	0.56501
0.1927	-0.46088	0.55563
0.1928	-0.44136	0.5161
0.1929	-0.39694	0.58265
0.193	-0.40068	0.57618
0.1931	-0.33881	0.46399
0.1932	-0.17522	0.53562
0.1933	-0.10131	0.6069
0.1934	-0.03322	0.63857
0.1935	-0.03861	0.61248
0.1936	-0.07806	0.58094
0.1937	-0.1117	0.62497
0.1938	-0.12498	0.61922
0.1939	-0.20138	0.60803
0.194	-0.31639	0.55105
0.1941	-0.39569	0.60416
0.1942	-0.55638	0.68198
0.1943	-0.66059	0.69694
0.1944	-0.61907	0.62798
0.1945	-0.64855	0.5136
0.1946	-0.77478	0.4392
0.1947	-0.8055	0.36406
0.1948	-0.8217	0.32198
0.1949	-0.88314	0.35365
0.195	-0.90058	0.33447
0.1951	-0.95912	0.31492
0.1952	-1.00355	0.24813
0.1953	-1.13227	0.13231
0.1954	-1.12521	-0.13466
0.1955	-1.12812	-0.28827
0.1956	-1.18625	-0.36086
0.1957	-1.13725	-0.39204
0.1958	-1.12314	-0.42612
0.1959	-1.08328	-0.4642
0.196	-1.22445	-0.51136
0.1961	-1.26182	-0.49604
0.1962	-1.25725	-0.50215
0.1963	-1.08536	-0.4712
0.1964	-1.02557	-0.41446
0.1965	-0.9828	-0.30721
0.1966	-1.04716	-0.27917
0.1967	-1.04757	-0.20281
0.1968	-1.09283	-0.28522
0.1969	-1.03761	-0.31712
0.197	-0.97533	-0.28762
0.1971	-1.06294	-0.30318
0.1972	-1.04508	-0.31619
0.1973	-1.10362	-0.21694
0.1974	-1.09075	-0.13368
0.1975	-1.14722	0.02951
0.1976	-1.15054	0.20215
0.1977	-1.20535	0.3043
0.1978	-1.28839	0.46096
0.1979	-1.28091	0.54276
0.198	-1.30997	0.6144
0.1981	-1.26056	0.67187
0.1982	-1.25226	0.76749
0.1983	-1.2369	0.8562
0.1984	-1.33779	0.87879
0.1985	-1.36935	0.99548
0.1986	-1.38595	1.06276
0.1987	-1.42913	1.05665
0.1988	-1.39882	1.10685
0.1989	-1.31993	1.22645
0.199	-1.34443	1.25594
0.1991	-1.30623	1.34647
0.1992	-1.24602	1.30549
0.1993	-1.2481	1.38984
0.1994	-1.17627	1.51924
0.1995	-1.18499	1.57962
0.1996	-1.20243	1.61529
0.1997	-1.19703	1.63279
[truncated: 18,002 more rows]

## Sheet: Supplement 2
Supp 2B			Supp 2D
F, GLT1	F, GLT1-SEP		F, GLT1	F, GLT1-SEP	GLT1ΔC-SEP
86.3522	97.8588		14.3873	5.52152	8.04621
235.064	43.9758		17.7731	6.21354	7.91646
206.812	73.074		7.57484	5.18014	7.32712
104.321	161.614		17.0212	5.98191	5.16456
169.272	104.744		16.7697	6.41173	4.32678
74.1925	10.6291		10.1508	6.20957	15.1757
197.229	55.3313
143.956	81.126
544.833	78.5056
197.568	50.3908
166.607	3.46677
162.831	68.045
152.96	124.736
141.998	51.497
95.2034	41.3065
110.077	83.8655
122.09	67.2102
117.736	180.846
110.609	166.468
107.735	77.069
146.594	23.8131
135.229	33.0092
304.453	155.51
275.506	102.687
53.9667	55.057
336.297	59.9259
122.488	94.2307
192.154	43.588
78.6901	49.9769
178.288	52.3914
24.2653	38.9437
132.454	81.7652
79.9024	49.2256
133.495	47.9674
133.055	61.3575
71.3279	61.1919
142.848	93.4257
110.755	58.2222
101.522	53.9542
89.1504	26.9873
67.3055	27.303
56.0763	76.5591
40.8753	34.5467
134.1	45.8233
48.2578	31.8487
77.924	22.639
94.0814	31.7368
53.751	77.725
61.9963	47.3033
75.4013	60.9742
51.663	34.5652
52.9995	59.5065
39.2599	74.7553
42.1659	94.4139
71.0831	213.399
82.4272	71.0172
76.9792	185.121
112.265	84.5372
94.0412	79.0585
57.977	74.3363
69.5851	25.2314
69.1389	157.811
105.74	91.7006
129.327	66.2701
117.461	76.3901
104.912	62.2608
103.015	93.4105
88.949	70.4292
53.5582	109.954
79.0723	125.816
123.09	77.795
124.644	83.0246
94.9374	71.4036
76.3536	61.8471
60.0012	67.2375
89.4303	115.596
43.2694	77.2421
42.3881	41.6547
109.871	45.7196
82.2678	47.0194
44.3752	21.1122
64.0498	63.5574
119.066	49.7859
91.612	52.1567
39.4517	56.0743
46.2795	52.9097
59.5343	72.4613
42.3552	61.1631
87.353	42.1156
34.8205	60.2109
64.6194	68.9799
145.731	60.3501
56.803	102.76
44.9393	62.3781
62.0195	68.041
83.0877	49.5798
75.8446	66.9333
45.1894	61.079
68.3763	58.3903
75.5813	71.1624
60.7411	97.6242
59.2557	115.472
49.9442	180.322
78.0838	60.7851
66.813	125.184
57.1755	109.944
40.9274	105.434
50.1686	54.6865
53.5595	85.6268
58.5828	72.3758
42.7327	103.783
60.5485	79.7092
49.8585	78.0179
28.7369	87.291
58.8621	118.198
30.5795	71.1094
115.774	94.1457
133.403	55.1059
37.1573	137.409
82.4072	65.0738
60.5023	70.5439
53.8288	79.5109
68.0585	102.584
79.8117	97.4386
103.677	82.0189
41.1315	80.7839
105.202	99.7037
66.3392	79.9321
36.4914	77.556
131.092	142.783
115.414	61.1184
28.8339	103.991
57.016	63.0601
95.0698	181.98
156.743	126.022
65.553	98.7524
172.069	128.039
30.7177	34.7206
125.114	51.523
46.2578	44.1547
90.1687	59.4875
176.763	106.151
108.868	99.6011
90.8984	151.526
104.667	72.5216
160.87	63.6833
107.14	94.3133
34.7642	69.2891
124.76	164.622
106.7	89.2911
134.615	46.4943
134.936	70.4549
104.493	43.1664
165.213	101.95
100.12	66.6025
191.176
149.621
147.519
103.622
9.95086
80.9625
59.7919
79.5275
47.8995
146.232
79.3374
85.8506
192.009
115.23
61.5404
129.513
119.995
132.099
52.0089
54.0229
81.516
156.889
167.318
148.196
120.335
74.3159
151.378
125.034
70.1662
78.6912
85.799
110.638
193.989

## Sheet: Supplement 3
Supp 3 B GLT1-SEP			Supp 3 B GLT1DC-SEP			Supp 3C
F, Native	F, Transfected		F, Native	F, Transfected		GLT1-SEP	GLT1DC-SEP
90.4506	143.115		105.165	117.613		10561.9	12459.4
95.9984	145.549		104.335	112.174		11209.7	12361.1
104.226	207.039		96.7146	100.719		12170.5	11458.2
100.93	156.836		107.93	107.477		11785.6	12787
75.809	100.63		114.01	142.053		8852.21	13507.3
76.178	105.495		96.8238	109.373		8895.3	11471.2
89.5714	152.256		101.472	106.794		10459.2	12021.8
86.8958	117.517		98.1966	119.363		10146.8	11633.8
85.2745	134.701		97.4682	128.371		9957.49	11547.5
80.762	144.626		110.489	131.077		9430.57	13090.2
79.8797	94.1719		90.6255	102.79		9327.55	10736.8
91.8839	142.208		103.496	137.333		10729.3	12261.7
93.1081	151.716		91.5817	107.628		10872.2	10850.1
99.9724	141.766		78.9433	132.05		11673.8	9352.8
90.4232	121.228		105.205	137.702		10558.7	12464.2
81.5797	101.673		93.5296	91.3175		9526.05	11080.9
95.9646	132.548		91.636	96.1389		11205.8	10856.6
92.5466	130.789		80.732	97.8433		10806.7	9564.72
87.3192	112.262		81.784	89.0879		10196.3	9689.35
85.9325	101.28		82.9213	89.8303		10034.3	9824.09
114.147	194.51		92.1422	110.005		13329	10916.5
116.945	257.943		85.039	97.9131		13655.7	10075
123.688	304.975		94.1855	101.537		14443	11158.6
114.505	203.964		126.602	255.114		13370.7	14999.2
107.054	173.441		131.873	156.647		12500.7	15623.6
149.508	244.149		109.365	168.445		17458.1	12957
147.737	302.018		127.735	165.589		17251.2	15133.4
121.357	277.563					14170.8
120.354	191.038					14053.7
