# Supplementary material for: Rapid recycling of glutamate transporters on the astroglial surface
Source: eLife. 2021 Apr 16;10:e64714. doi: 10.7554/eLife.64714 (PMC8079145; doi:10.7554/eLife.64714)
Supplement: Figure 3—source data 1. [file elife-64714-fig3-data1.xlsx]

## Sheet: Figure 3
Figure 3 B			Figure 3 C left					Figure 3 C middle					Figure 3 C right
Time, s	Current - WT GLT1	Current - GLT1-SEP	N-N dist, nm	GLT1 vs PSD95	N-N dist, nm	Theory		N-N dist, nm	GLT1-SEP PSD95	N-N dist, nm	Theory		N-N dist, nm	GLT1DC-SEP PSD95	N-N dist, nm	Theory
0	0	0.2955	5	0	2.5	0		5	0	2.5	0		5	0	2.5	0
0.0001	-0.88067	-0.02232	10	0.02836	5	0.07951		10	0.02836	5	0.07951		10	0.000766812	5	0.36389
0.0002	-1.38812	-0.06753	15	0.07062	7.5	0.20455		15	0.07062	7.5	0.20455		15	0.00251	7.5	0.68315
0.0003	-1.44243	-0.29285	20	0.11654	10	0.34634		20	0.11654	10	0.34634		20	0.00488	10	0.83273
0.0004	-1.28466	-0.12639	25	0.16439	12.5	0.47482		25	0.16439	12.5	0.47482		25	0.00802	12.5
0.0005	-1.2651	-0.13488	30	0.21365	15	0.57787		30	0.21365	15	0.57787		30	0.0138	15	0.93267
0.0006	-1.27034	-0.2945	35	0.26208	17.5	0.66095		35	0.26208	17.5	0.66095		35	0.02217	17.5	0.95111
0.0007	-1.43055	-0.20605	40	0.31008	20	0.72394		40	0.31008	20	0.72394		40	0.03137	20	0.96239
0.0008	-1.2643	-0.27752	45	0.35775	22.5	0.77647		45	0.35775	22.5	0.77647		45	0.03994	22.5	0.97102
0.0009	-1.30101	-0.26928	50	0.40475	25	0.82413		50	0.40475	25	0.82413		50	0.0488	25	0.97632
0.001	-1.23731	-0.211	55	0.44998	27.5	0.85824		55	0.44998	27.5	0.85824		55	0.06037	27.5	0.98103
0.0011	-1.31329	-0.23673	60	0.49375	30	0.88071		60	0.49375	30	0.88071		60	0.07215	30	0.98466
0.0012	-1.36685	-0.23158	65	0.53516	32.5	0.90127		65	0.53516	32.5	0.90127		65	0.08268	32.5	0.98682
0.0013	-1.37972	-0.19918	70	0.57382	35	0.91767		70	0.57382	35	0.91767		70	0.0932	35	0.98907
0.0014	-1.30125	-0.2438	75	0.60896	37.5	0.93134		75	0.60896	37.5	0.93134		75	0.10366	37.5	0.99143
0.0015	-1.15344	-0.22266	80	0.64008	40	0.94132		80	0.64008	40	0.94132		80	0.11495	40	0.99348
0.0016	-1.15884	-0.26546	85	0.66951	42.5	0.95		85	0.66951	42.5	0.95		85	0.12771	42.5	0.99466
0.0017	-1.27634	-0.2792	90	0.69745	45	0.95939		90	0.69745	45	0.95939		90	0.13963	45	0.99525
0.0018	-1.39343	-0.40847	95	0.72402	47.5	0.96569		95	0.72402	47.5	0.96569		95	0.14995	47.5	0.99564
0.0019	-1.44367	-0.42039	100	0.74803	50	0.9702		100	0.74803	50	0.9702		100	0.16152	50	0.99613
0.002	-1.47398	-0.4839	105	0.76959	52.5	0.97436		105	0.76959	52.5	0.97436		105	0.17274	52.5	0.99653
0.0021	-1.55287	-0.51726	110	0.78886	55	0.97769		110	0.78886	55	0.97769		110	0.18278	55	0.99692
0.0022	-1.57363	-0.55498	115	0.8069	57.5	0.98019		115	0.8069	57.5	0.98019		115	0.19442	57.5	0.99741
0.0023	-1.62429	-0.62321	120	0.82422	60	0.98245		120	0.82422	60	0.98245		120	0.20537	60	0.9977
0.0024	-1.52837	-0.76302	125	0.83991	62.5	0.98435		125	0.83991	62.5	0.98435		125	0.21603	62.5	0.9978
0.0025	-1.48519	-0.92062	130	0.85404	65	0.98589		130	0.85404	65	0.98589		130	0.22698	65	0.9978
0.0026	-1.68781	-0.9478	135	0.86673	67.5	0.98744		135	0.86673	67.5	0.98744		135	0.23681	67.5	0.998
0.0027	-1.61266	-0.93829	140	0.87837	70	0.98875		140	0.87837	70	0.98875		140	0.24859	70	0.99819
0.0028	-1.53045	-0.97347	145	0.88892	72.5	0.99065		145	0.88892	72.5	0.99065		145	0.26051	72.5	0.99819
0.0029	-1.49308	-1.03589	150	0.89862	75	0.99255		150	0.89862	75	0.99255		150	0.26992	75	0.99829
0.003	-1.48893	-1.11974	155	0.90754	77.5	0.99362		155	0.90754	77.5	0.99362		155	0.27996	77.5	0.99849
0.0031	-1.41295	-1.16146	160	0.91578	80	0.99457		160	0.91578	80	0.99457		160	0.29132	80	0.99888
0.0032	-1.42831	-1.12579	165	0.9229	82.5	0.99528		165	0.9229	82.5	0.99528		165	0.30261	82.5	0.99917
0.0033	-1.24687	-1.11627	170	0.92972	85	0.99564		170	0.92972	85	0.99564		170	0.31439	85	0.99917
0.0034	-1.12936	-1.13038	175	0.93643	87.5	0.99588		175	0.93643	87.5	0.99588		175	0.32617	87.5	0.99917
0.0035	-1.1115	-1.06637	180	0.94237	90	0.99623		180	0.94237	90	0.99623		180	0.33656	90	0.99917
0.0036	-1.14513	-1.02016	185	0.9479	92.5	0.99683		185	0.9479	92.5	0.99683		185	0.34639	92.5	0.99917
0.0037	-1.10444	-0.99611	190	0.95327	95	0.9973		190	0.95327	95	0.9973		190	0.35622	95	0.99937
0.0038	-0.98943	-0.97607	195	0.95827	97.5	0.99754		195	0.95827	97.5	0.99754		195	0.36744	97.5	0.99957
0.0039	-0.84161	-1.03776	200	0.96274	100	0.99766		200	0.96274	100	0.99766		200	0.37985	100	0.99966
0.004	-0.84286	-1.02716	205	0.96661	102.5	0.99778		205	0.96661	102.5	0.99778		205	0.3917	102.5	0.99976
0.0041	-0.7702	-1.00311	210	0.97004	105	0.99813		210	0.97004	105	0.99813		210	0.40313	105	0.99976
0.0042	-0.75525	-0.94673	215	0.9738	107.5	0.99837		215	0.9738	107.5	0.99837		215	0.41443	107.5	0.99976
0.0043	-0.73864	-0.83223	220	0.97742	110	0.99837		220	0.97742	110	0.99837		220	0.42579	110	0.99976
0.0044	-0.71539	-0.71663	225	0.97998	112.5	0.99837		225	0.97998	112.5	0.99837		225	0.43813	112.5	0.99976
0.0045	-0.69339	-0.5033	230	0.98279	115	0.99837		230	0.98279	115	0.99837		230	0.45075	115	0.99976
0.0046	-0.70377	-0.26309	235	0.9858	117.5	0.99849		235	0.9858	117.5	0.99849		235	0.46253	117.5	0.99976
0.0047	-0.72245	-0.20017	240	0.98804	120	0.99873		240	0.98804	120	0.99873		240	0.47396	120	0.99976
0.0048	-0.7291	-0.17722	245	0.98984	122.5	0.99897		245	0.98984	122.5	0.99897		245	0.4863	122.5	0.99976
0.0049	-0.84161	-0.18296	250	0.99126	125	0.99909		250	0.99126	125	0.99909		250	0.49933	125	0.99976
0.005	-0.8578	-0.18398	255	0.9926	127.5	0.99909		255	0.9926	127.5	0.99909		255	0.51195	127.5	0.99976
0.0051	-0.95206	-0.12252	260	0.99361	130	0.9992		260	0.99361	130	0.9992		260	0.52534	130	0.99976
0.0052	-1.09281	-0.17949	265	0.99449	132.5	0.99932		265	0.99449	132.5	0.99932		265	0.53956	132.5	0.99976
0.0053	-1.04548	-0.22266	270	0.9955	135	0.99932		270	0.9955	135	0.99932		270	0.55273	135	0.99976
0.0054	-1.15094	-0.32977	275	0.99636	137.5	0.99932		275	0.99636	137.5	0.99932		275	0.56486	137.5	0.99976
0.0055	-1.29792	-0.4336	280	0.99691	140	0.99932		280	0.99691	140	0.99932		280	0.57734	140	0.99976
0.0056	-1.35149	-0.47423	285	0.99735	142.5	0.99932		285	0.99735	142.5	0.99932		285	0.58968	142.5	0.99976
0.0057	-1.27758	-0.5559	290	0.99776	145	0.99932		290	0.99776	145	0.99932		290	0.60216	145	0.99976
0.0058	-1.25142	-0.50388	295	0.99804	147.5	0.99932		295	0.99804	147.5	0.99932		295	0.61526	147.5	0.99976
0.0059	-1.29585	-0.49946	300	0.99825	150	0.99932		300	0.99825	150	0.99932		300	0.62976	150	0.99986
0.006	-1.39052	-0.34535	305	0.99841	152.5	0.99932		305	0.99841	152.5	0.99932		305	0.64405	152.5	1
0.0061	-1.33571	-0.28933	310	0.99857	155	0.99932		310	0.99857	155	0.99932		310	0.6566	155
0.0062	-1.34858	-0.25475	315	0.99878	157.5	0.99932		315	0.99878	157.5	0.99932		315	0.66866	157.5
0.0063	-1.33197	-0.29647	320	0.99894	160	0.99932		320	0.99894	160	0.99932		320	0.68037	160
0.0064	-1.35273	-0.30512	325	0.99905	162.5	0.99932		325	0.99905	162.5	0.99932		325	0.69292	162.5
0.0065	-1.36394	-0.31086	330	0.99914	165	0.99932		330	0.99914	165	0.99932		330	0.7063	165
0.0066	-1.42706	-0.41797	335	0.99919	167.5	0.99932		335	0.99919	167.5	0.99932		335	0.71774	167.5
0.0067	-1.3926	-0.49965	340	0.99924	170	0.99932		340	0.99924	170	0.99932		340	0.72805	170
0.0068	-1.28173	-0.52865	345	0.99937	172.5	0.99932		345	0.99937	172.5	0.99932		345	0.73921	172.5
0.0069	-1.25599	-0.5878	350	0.99951	175	0.99932		350	0.99951	175	0.99932		350	0.75064	175
0.007	-1.23606	-0.58519	355	0.99954	177.5	0.99932		355	0.99954	177.5	0.99932		355	0.76137	177.5
0.0071	-1.27634	-0.66723	360	0.99954	180	0.99932		360	0.99954	180	0.99932		360	0.77099	180
0.0072	-1.29378	-0.71693	365	0.99958	182.5	0.99932		365	0.99958	182.5	0.99932		365	0.77922	182.5
0.0073	-1.26762	-0.80478	370	0.99965	185	0.99932		370	0.99965	185	0.99932		370	0.78717	185
0.0074	-1.2618	-0.88319	375	0.99967	187.5	0.99932		375	0.99967	187.5	0.99932		375	0.79658	187.5
0.0075	-1.34817	-0.85406	380	0.99967	190	0.99932		380	0.99967	190	0.99932		380	0.80641	190
0.0076	-1.39923	-0.84745	385	0.9997	192.5	0.99932		385	0.9997	192.5	0.99932		385	0.81533	192.5
0.0077	-1.44325	-1.03776	390	0.99974	195	0.99932		390	0.99974	195	0.99932		390	0.82439	195
0.0078	-1.54995	-1.11871	395	0.99979	197.5	0.99932		395	0.99979	197.5	0.99932		395	0.83408	197.5
0.0079	-1.60559	-1.19784	400	0.99981	200	0.99932		400	0.99981	200	0.99932		400	0.84349	200
0.008	-1.57403	-1.22284	405	0.99986	202.5	0.99932		405	0.99986	202.5	0.99932		405	0.852	202.5
0.0081	-1.55161	-1.33213	410	0.9999	205	0.99932		410	0.9999	205	0.99932		410	0.85988	205
0.0082	-1.55245	-1.39165	415	0.9999	207.5	0.99944		415	0.9999	207.5	0.99944		415	0.86768	207.5
0.0083	-1.54871	-1.44498	420	0.9999	210	0.99956		420	0.9999	210	0.99956		420	0.87598	210
0.0084	-1.44823	-1.44819	425	0.9999	212.5	0.99956		425	0.9999	212.5	0.99956		425	0.88532	212.5
0.0085	-1.45114	-1.62941	430	0.9999	215	0.99956		430	0.9999	215	0.99956		430	0.89466	215
0.0086	-1.40796	-1.62208	435	0.9999	217.5	0.99956		435	0.9999	217.5	0.99956		435	0.90344	217.5
0.0087	-1.35149	-1.64635	440	0.9999	220	0.99956		440	0.9999	220	0.99956		440	0.91223	220
0.0088	-1.42166	-1.76109	445	0.9999	222.5	0.99956		445	0.9999	222.5	0.99956		445	0.92122	222.5
0.0089	-1.46567	-1.79154	450	0.99993	225	0.99956		450	0.99993	225	0.99956		450	0.92882	225
0.009	-1.49723	-1.76858	455	0.99995	227.5	0.99956		455	0.99995	227.5	0.99956		455	0.936	227.5
0.0091	-1.5483	-1.76634	460	0.99995	230	0.99956		460	0.99995	230	0.99956		460	0.94374	230
0.0092	-1.47896	-1.69579	465	0.99995	232.5	0.99956		465	0.99995	232.5	0.99956		465	0.95092	232.5
0.0093	-1.38305	-1.75567	470	0.99995	235	0.99968		470	0.99995	235	0.99968		470	0.95824	235
0.0094	-1.39011	-1.62845	475	0.99995	237.5	0.9998		475	0.99995	237.5	0.9998		475	0.9659	237.5
0.0095	-1.43952	-1.55354	480	0.99995	240	0.9998		480	0.99995	240	0.9998		480	0.97315	240
0.0096	-1.30043	-1.49062	485	0.99995	242.5	0.9998		485	0.99995	242.5	0.9998		485	0.98019	242.5
0.0097	-1.2095	-1.46112	490	0.99997	245	0.9998		490	0.99997	245	0.9998		490	0.98682	245
0.0098	-1.22361	-1.29321	495	1	247.5	0.9998		495	1	247.5	0.9998		495	0.99337	247.5
0.0099	-1.15469	-1.21685	500	1	250	0.9998		500	1	250	0.9998		500	1.00006	250
0.01	-1.09075	-1.16592			500	1				500	1				500	1
0.0101	-1.08618	-1.103			--	--				--	--				--	--
0.0102	-1.06584	-1.04299			--	--				--	--				--	--
0.0103	-1.11234	-1.06181			--	--				--	--				--	--
0.0104	-1.16714	-1.02433			--	--				--	--				--	--
0.0105	-1.21739	-1.02353			--	--				--	--				--	--
0.0106	-1.1933	-0.90358
0.0107	-1.19995	-0.94166
0.0108	-1.26223	-0.94232
0.0109	-1.28382	-0.85433
0.011	-1.29793	-0.8212
0.0111	-1.36686	-0.88399
0.0112	-1.3544	-0.88719
0.0113	-1.35814	-0.92091
0.0114	-1.35814	-0.85218
0.0115	-1.26929	-0.88808
0.0116	-1.2095	-0.87203
0.0117	-1.2207	-0.94062
0.0118	-1.2452	-0.97071
0.0119	-1.17545	-0.979
0.012	-1.15967	-0.93824
0.0121	-1.15469	-0.99921
0.0122	-1.12812	-1.0144
0.0123	-1.13351	-1.02015
0.0124	-1.043	-1.01318
0.0125	-0.9392	-0.9924
0.0126	-0.89851	-0.94983
0.0127	-0.84038	-0.95267
0.0128	-0.85574	-0.81455
0.0129	-0.77229	-0.79595
0.013	-0.71	-0.8333
0.0131	-0.73118	-0.89173
0.0132	-0.72329	-0.82663
0.0133	-0.62987	-0.83165
0.0134	-0.55306	-0.82359
0.0135	-0.52731	-0.8762
0.0136	-0.4995	-0.88486
0.0137	-0.54434	-0.97344
0.0138	-0.61617	-0.94721
0.0139	-0.56261	-0.94823
0.014	-0.58337	-0.94744
0.0141	-0.7507	-1.02221
0.0142	-0.85034	-0.97019
0.0143	-0.85657	-1.0555
0.0144	-0.8956	-1.16624
0.0145	-0.98653	-1.23121
0.0146	-1.1032	-1.21552
0.0147	-1.13351	-1.31064
0.0148	-1.23607	-1.3687
0.0149	-1.18541	-1.4373
0.015	-1.20908	-1.43687
0.0151	-1.20867	-1.35905
0.0152	-1.22901	-1.26416
0.0153	-1.2315	-1.31351
0.0154	-1.30998	-1.24078
0.0155	-1.35233	-1.25524
0.0156	-1.45945	-1.21303
0.0157	-1.56865	-1.21769
0.0158	-1.43661	-1.17039
0.0159	-1.30125	-1.1874
0.016	-1.29419	-1.14519
0.0161	-1.25807	-1.12478
0.0162	-1.17212	-1.00264
0.0163	-1.05587	-1.01275
0.0164	-1.02597	-0.94329
0.0165	-0.91677	-0.90144
0.0166	-0.91968	-0.81745
0.0167	-0.84411	-0.89041
0.0168	-0.852	-0.93612
0.0169	-0.75775	-0.92697
0.017	-0.77478	-0.93272
0.0171	-0.72246	-0.97624
0.0172	-0.70918	-1.06628
0.0173	-0.61285	-1.07929
0.0174	-0.57423	-0.99893
0.0175	-0.62157	-1.04319
0.0176	-0.65644	-0.9919
0.0177	-0.68219	-0.87812
0.0178	-0.7291	-0.87187
0.0179	-0.8902	-0.86127
0.018	-0.95249	-0.83614
0.0181	-0.9255	-0.85205
0.0182	-0.98072	-0.88251
0.0183	-1.00023	-0.9689
0.0184	-0.99359	-0.97792
0.0185	-1.08701	-0.96695
0.0186	-1.13767	-0.95889
0.0187	-1.08244	-0.92904
0.0188	-1.15635	-0.90572
0.0189	-1.09739	-0.81156
0.019	-1.11524	-0.75009
0.0191	-1.1526	-0.82668
0.0192	-1.27135	-0.87893
0.0193	-1.24436	-0.85416
0.0194	-1.27924	-0.85736
0.0195	-1.26305	-0.86311
0.0196	-1.14679	-0.80673
0.0197	-1.17585	-0.7914
0.0198	-1.04423	-0.86109
0.0199	-0.92714	-0.84286
0.02	-0.86528	-0.7872
0.0201	-0.85033	-0.76025
0.0202	-0.84909	-0.69806
0.0203	-0.8466	-0.74341
0.0204	-0.84286	-0.71064
0.0205	-0.76937	-0.73637
0.0206	-0.65187	-0.74756
0.0207	-0.64481	-0.74895
0.0208	-0.67139	-0.79248
0.0209	-0.57548	-0.77243
0.021	-0.5871	-0.81705
0.0211	-0.52856	-0.82534
0.0212	-0.46919	-0.78858
0.0213	-0.35957	-0.66463
0.0214	-0.44552	-0.74957
0.0215	-0.44054	-0.86903
0.0216	-0.47251	-0.9765
0.0217	-0.47127	-1.1243
0.0218	-0.46836	-1.28227
0.0219	-0.56344	-1.42535
0.022	-0.58919	-1.49503
0.0221	-0.54393	-1.56726
0.0222	-0.59002	-1.54722
0.0223	-0.66725	-1.5704
0.0224	-0.64275	-1.56452
0.0225	-0.6195	-1.60841
0.0226	-0.75403	-1.60544
0.0227	-0.84537	-1.621
0.0228	-0.88108	-1.62093
0.0229	-0.85326	-1.69825
0.023	-0.92218	-1.81153
0.0231	-0.93879	-1.90047
0.0232	-1.00356	-2.02575
0.0233	-1.05795	-2.13104
0.0234	-1.06626	-2.26358
0.0235	-1.0048	-2.25261
0.0236	-1.1032	-2.34155
0.0237	-1.05047	-2.2968
0.0238	-1.04673	-2.18084
0.0239	-0.97033	-2.02818
0.024	-0.90266	-1.87371
0.0241	-0.89186	-1.83622
0.0242	-0.90141	-1.91391
0.0243	-0.98362	-2.00939
0.0244	-0.98071	-2.09143
0.0245	-0.98902	-2.05503
0.0246	-0.97947	-2.06586
0.0247	-0.923	-2.04945
0.0248	-0.80135	-2.07554
0.0249	-0.759	-2.09582
0.025	-0.7619	-2.05433
0.0251	-0.79346	-2.01866
0.0252	-0.81754	-1.93322
0.0253	-0.9201	-1.79836
0.0254	-0.9558	-1.78813
0.0255	-0.99442	-1.73138
0.0256	-1.04217	-1.66192
0.0257	-0.94045	-1.44969
0.0258	-0.86073	-1.44635
0.0259	-0.87111	-1.38598
0.026	-0.9608	-1.33214
0.0261	-1.00937	-1.2674
0.0262	-1.03055	-1.15072
0.0263	-1.0812	-1.04929
0.0264	-1.03761	-0.95985
0.0265	-1.02474	-0.85261
0.0266	-1.07664	-0.81076
0.0267	-1.07166	-0.75147
0.0268	-1.09491	-0.71653
0.0269	-1.18086	-0.71683
0.027	-1.20701	-0.75709
0.0271	-1.28009	-0.75665
0.0272	-1.19331	-0.74642
0.0273	-1.19871	-0.72491
0.0274	-1.08411	-0.81059
0.0275	-1.1273	-0.78073
0.0276	-1.15553	-0.80573
0.0277	-1.10944	-0.8162
0.0278	-1.1821	-0.75437
0.0279	-1.30043	-0.56866
0.028	-1.33365	-0.55042
0.0281	-1.34154	-0.54418
0.0282	-1.44202	-0.52014
0.0283	-1.54374	-0.57783
0.0284	-1.64049	-0.50438
0.0285	-1.70443	-0.53374
0.0286	-1.85889	-0.58926
0.0287	-1.97348	-0.66585
0.0288	-2.10012	-0.69848
0.0289	-2.1404	-0.75145
0.029	-2.20932	-0.73322
0.0291	-2.21264	-0.63652
0.0292	-2.11714	-0.62628
0.0293	-2.23838	-0.60913
0.0294	-2.26495	-0.6276
0.0295	-2.25374	-0.51817
0.0296	-2.16198	-0.44508
0.0297	-2.17984	-0.39234
0.0298	-2.23506	-0.4108
0.0299	-2.20683	-0.55242
0.03	-2.18482	-0.72202
0.0301	-2.17652	-0.83675
0.0302	-2.11299	-0.97983
0.0303	-2.00836	-1.17885
0.0304	-1.89833	-1.2707
0.0305	-1.8236	-1.39997
0.0306	-1.74221	-1.37774
0.0307	-1.56077	-1.39511
0.0308	-1.48437	-1.39868
0.0309	-1.50637	-1.37246
0.031	-1.55537	-1.37021
0.0311	-1.62138	-1.36033
0.0312	-1.67411	-1.35772
0.0313	-1.73681	-1.32568
0.0314	-1.67121	-1.24061
0.0315	-1.6571	-1.16352
0.0316	-1.71896	-1.13112
0.0317	-1.74221	-1.0751
0.0318	-1.71232	-0.94715
0.0319	-1.70194	-0.93074
0.032	-1.71024	-0.85474
0.0321	-1.72685	-0.79436
0.0322	-1.75965	-0.70928
0.0323	-1.80367	-0.62566
0.0324	-1.84685	-0.49553
0.0325	-1.87591	-0.42461
0.0326	-1.82692	-0.37332
0.0327	-1.78789	-0.41358
0.0328	-1.83606	-0.44113
0.0329	-1.72686	-0.41454
0.033	-1.57323	-0.43336
0.0331	-1.46154	-0.43402
0.0332	-1.40674	-0.43323
0.0333	-1.4167	-0.50437
0.0334	-1.40798	-0.57805
0.0335	-1.4578	-0.73602
0.0336	-1.45324	-0.84059
0.0337	-1.42002	-0.89611
0.0338	-1.3868	-0.9865
0.0339	-1.45033	-1.11904
0.034	-1.40632	-1.07429
0.0341	-1.35068	-1.08875
0.0342	-1.35026	-1.18496
0.0343	-1.3432	-1.17763
0.0344	-1.25933	-1.11798
0.0345	-1.19456	-1.19748
0.0346	-1.23276	-1.27043
0.0347	-1.24272	-1.34085
0.0348	-1.24438	-1.35168
0.0349	-1.23068	-1.30947
0.035	-1.24064	-1.37989
0.0351	-1.24853	-1.39144
0.0352	-1.26597	-1.48111
0.0353	-1.18334	-1.50212
0.0354	-1.08328	-1.51622
0.0355	-1.03926	-1.50126
0.0356	-0.972	-1.44052
0.0357	-0.95165	-1.47497
0.0358	-0.84577	-1.58643
0.0359	-0.8221	-1.62815
0.036	-0.67844	-1.70219
0.0361	-0.64938	-1.69631
0.0362	-0.63692	-1.79143
0.0363	-0.57755	-1.82661
0.0364	-0.53312	-1.86287
0.0365	-0.53229	-1.99904
0.0366	-0.51692	-1.94157
0.0367	-0.40607	-1.87066
0.0368	-0.38946	-1.86514
0.0369	-0.34005	-1.95155
0.037	-0.25202	-2.03685
0.0371	-0.22587	-2.06185
0.0372	-0.14822	-2.14571
0.0373	-0.05065	-2.10205
0.0374	0.0079	-2.14158
0.0375	0.098	-2.15823
0.0376	0.10589	-2.1142
0.0377	0.1445	-2.07853
0.0378	0.20014	-1.96075
0.0379	-0.07639	-1.90837
0.038	0.0764	-1.8549
0.0381	0.13038	-1.79779
0.0382	0.10838	-1.85222
0.0383	0.13827	-1.81364
0.0384	0.11378	-1.73111
0.0385	0.14077	-1.77354
0.0386	0.17813	-1.66921
0.0387	0.1935	-1.72691
0.0388	0.17232	-1.77262
0.0389	0.1856	-1.70534
0.039	0.15654	-1.58792
0.0391	0.12706	-1.47378
0.0392	0.14865	-1.32766
0.0393	0.11419	-1.2157
0.0394	0.06685	-1.06014
0.0395	0.00706	-0.98995
0.0396	-0.01162	-0.8729
0.0397	-0.05979	-0.80018
0.0398	-0.00789	-0.85315
0.0399	0.04567	-0.95881
0.04	0.27445	-0.93476
0.0401	0.12996	-0.95104
0.0402	0.04401	-0.93644
0.0403	-0.01121	-0.90005
0.0404	-0.0955	-0.86583
0.0405	-0.0847	-0.88756
0.0406	-0.11045	-0.77196
0.0407	-0.2076	-0.78861
0.0408	-0.14325	-0.67737
0.0409	-0.07225	-0.59956
0.041	-0.14325	-0.65253
0.0411	-0.1939	-0.56672
0.0412	-0.18393	-0.4831
0.0413	-0.27777	-0.46414
0.0414	-0.3658	-0.49059
0.0415	-0.40317	-0.6809
0.0416	-0.40109	-0.71607
0.0417	-0.46752	-0.77377
0.0418	-0.404	-0.90485
0.0419	-0.40898	-0.94475
0.042	-0.52274	-0.95304
0.0421	-0.50613	-1.00565
0.0422	-0.51569	-1.08951
0.0423	-0.57008	-1.17663
0.0424	-0.5186	-1.28047
0.0425	-0.38822	-1.36723
0.0426	-0.45964	-1.37371
0.0427	-0.43846	-1.54003
0.0428	-0.28027	-1.56068
0.0429	-0.3521	-1.65652
0.043	-0.453	-1.73238
0.0431	-0.35584	-1.79226
0.0432	-0.28194	-1.89537
0.0433	-0.33841	-2.02137
0.0434	-0.30229	-2.10414
0.0435	-0.19226	-2.09608
0.0436	-0.17316	-1.96377
0.0437	-0.2209	-1.91284
0.0438	-0.17938	-1.91168
0.0439	-0.22132	-1.90944
0.044	-0.24831	-1.85815
0.0441	-0.31765	-1.83773
0.0442	-0.28776	-1.79298
0.0443	-0.33301	-1.70826
0.0444	-0.31308	-1.69112
0.0445	-0.33509	-1.63474
0.0446	-0.50283	-1.57546
0.0447	-0.56262	-1.59973
0.0448	-0.69631	-1.65234
0.0449	-0.82337	-1.80741
0.045	-0.89021	-1.96647
0.0451	-0.9637	-2.0318
0.0452	-1.14182	-2.02301
0.0453	-1.26971	-2.13775
0.0454	-1.2394	-2.25503
0.0455	-1.23483	-2.2546
0.0456	-1.33365	-2.29922
0.0457	-1.40174	-2.38598
0.0458	-1.40673	-2.41897
0.0459	-1.46777	-2.49447
0.046	-1.55703	-2.49441
0.0461	-1.6409	-2.43984
0.0462	-1.58402	-2.43796
0.0463	-1.63301	-2.49203
0.0464	-1.61225	-2.52357
0.0465	-1.61475	-2.44466
0.0466	-1.67454	-2.44278
0.0467	-1.66955	-2.46378
0.0468	-1.57904	-2.52766
0.0469	-1.54499	-2.44839
0.047	-1.5591	-2.36622
0.0471	-1.49807	-2.15834
0.0472	-1.43828	-2.03693
0.0473	-1.37807	-1.92206
0.0474	-1.30416	-1.82572
0.0475	-1.38803	-1.69595
0.0476	-1.46858	-1.7115
0.0477	-1.47439	-1.64423
0.0478	-1.46733	-1.53408
0.0479	-1.44241	-1.44064
0.048	-1.46774	-1.3374
0.0481	-1.40048	-1.27666
0.0482	-1.44117	-1.32237
0.0483	-1.4611	-1.28742
0.0484	-1.49182	-1.25611
0.0485	-1.47521	-1.24696
0.0486	-1.47812	-1.37405
0.0487	-1.44407	-1.39142
0.0488	-1.38511	-1.38772
0.0489	-1.41335	-1.27939
0.049	-1.349	-1.31602
0.0491	-1.37266	-1.29161
0.0492	-1.39301	-1.32933
0.0493	-1.40214	-1.44842
0.0494	-1.36187	-1.57152
0.0495	-1.39924	-1.663
0.0496	-1.4088	-1.7534
0.0497	-1.37517	-1.79584
0.0498	-1.38721	-1.92329
0.0499	-1.42292	-2.04166
0.05	-1.4524	-2.13024
0.0501	-1.43579	-2.21482
0.0502	-1.46278	-2.28015
0.0503	-1.41669	-2.40179
0.0504	-1.30127	-2.51653
0.0505	-1.26847	-2.58949
0.0506	-1.30251	-2.64101
0.0507	-1.33116	-2.5948
0.0508	-1.32867	-2.61072
0.0509	-1.36646	-2.60012
0.051	-1.34404	-2.61095
0.0511	-1.43953	-2.51606
0.0512	-1.45282	-2.51418
0.0513	-1.48271	-2.55444
0.0514	-1.37725	-2.50205
0.0515	-1.45323	-2.49581
0.0516	-1.49641	-2.48593
0.0517	-1.48811	-2.45244
0.0518	-1.5317	-2.45165
0.0519	-1.5425	-2.4069
0.052	-1.52838	-2.44134
0.0521	-1.57737	-2.54591
0.0522	-1.54291	-2.50806
0.0523	-1.57737	-2.52107
0.0524	-1.57198	-2.43999
0.0525	-1.66706	-2.2975
0.0526	-1.70899	-2.17282
0.0527	-1.74055	-2.08956
0.0528	-1.71688	-2.0201
0.0529	-1.64588	-2.04547
0.053	-1.6027	-2.02287
0.0531	-1.56159	-2.00682
0.0532	-1.5699	-2.06343
0.0533	-1.56782	-2.03466
0.0534	-1.52547	-1.94559
0.0535	-1.61806	-1.84198
0.0536	-1.46111	-1.70422
0.0537	-1.43827	-1.51923
0.0538	-1.47481	-1.37784
0.0539	-1.4964	-1.32182
0.054	-1.47107	-1.2698
0.0541	-1.5429	-1.18
0.0542	-1.59398	-0.95577
0.0543	-1.74096	-0.90884
0.0544	-1.70442	-0.80487
0.0545	-1.72642	-0.76811
0.0546	-1.74179	-0.79056
0.0547	-1.79286	-0.79922
0.0548	-1.85888	-0.82458
0.0549	-1.89583	-0.91679
0.055	-2.03492	-0.93344
0.0551	-2.0914	-1.02674
0.0552	-2.22841	-1.05247
0.0553	-2.19021	-1.10653
0.0554	-2.22924	-1.25542
0.0555	-2.2716	-1.33928
0.0556	-2.2226	-1.40606
0.0557	-2.40986	-1.47684
0.0558	-2.39283	-1.61337
0.0559	-2.38245	-1.75391
0.056	-2.35588	-1.72986
0.0561	-2.46425	-1.68511
0.0562	-2.43145	-1.61674
0.0563	-2.38245	-1.69224
0.0564	-2.30813	-1.67728
0.0565	-2.34965	-1.72371
0.0566	-2.38619	-1.68913
0.0567	-2.4439	-1.60224
0.0568	-2.45636	-1.6098
0.0569	-2.43228	-1.64352
0.057	-2.51158	-1.54173
0.0571	-2.48293	-1.47808
0.0572	-2.5315	-1.43551
0.0573	-2.51158	-1.50883
0.0574	-2.44431	-1.42738
0.0575	-2.39449	-1.35174
0.0576	-2.38909	-1.33061
0.0577	-2.43019	-1.36796
0.0578	-2.30521	-1.37988
0.0579	-2.27698	-1.3166
0.058	-2.1873	-1.30927
0.0581	-2.12128	-1.38876
0.0582	-1.88627	-1.48134
0.0583	-1.82898	-1.61315
0.0584	-1.76545	-1.70137
0.0585	-1.73514	-1.75725
0.0586	-1.74261	-1.73538
0.0587	-1.69237	-1.72478
0.0588	-1.6384	-1.81409
0.0589	-1.55868	-1.88232
0.059	-1.45861	-1.91314
0.0591	-1.39882	-1.97556
0.0592	-1.34776	-2.01437
0.0593	-1.1933	-2.0074
0.0594	-1.04549	-1.95683
0.0595	-1.00562	-2.06975
0.0596	-0.99192	-2.14489
0.0597	-1.03635	-2.21567
0.0598	-1.11275	-2.32096
0.0599	-1.065	-2.40845
0.06	-1.06168	-2.521
0.0601	-1.06168	-2.53002
0.0602	-1.07704	-2.50888
0.0603	-1.09947	-2.55568
0.0604	-0.98487	-2.55198
0.0605	-0.98778	-2.57298
0.0606	-1.02349	-2.61615
0.0607	-0.86363	-2.67857
0.0608	-0.91262	-2.74499
0.0609	-0.91511	-2.7798
0.061	-0.99857	-2.74159
0.0611	-1.03926	-2.70846
0.0612	-0.98363	-2.73092
0.0613	-1.03096	-2.7541
0.0614	-1.18418	-2.8078
0.0615	-1.23691	-2.78739
0.0616	-1.2639	-2.75971
0.0617	-1.28424	-2.64085
0.0618	-1.28881	-2.62152
0.0619	-1.30832	-2.49721
0.062	-1.43164	-2.45718
0.0621	-1.57862	-2.32123
0.0622	-1.76712	-2.22998
0.0623	-1.85722	-2.21029
0.0624	-2.02372	-2.0976
0.0625	-2.16489	-2.03069
0.0626	-2.20475	-1.92235
0.0627	-2.19893	-1.80131
0.0628	-2.29775	-1.7006
0.0629	-2.33056	-1.62969
0.063	-2.37789	-1.517
0.0631	-2.41609	-1.4301
0.0632	-2.44598	-1.34611
0.0633	-2.49456	-1.24868
0.0634	-2.53234	-1.24026
0.0635	-2.48168	-1.12611
0.0636	-2.55102	-1.13876
0.0637	-2.62949	-1.02062
0.0638	-2.62783	-0.98241
0.0639	-2.52362	-0.91077
0.064	-2.51698	-0.87292
0.0641	-2.50079	-0.79656
0.0642	-2.37124	-0.7776
0.0643	-2.28031	-0.82585
0.0644	-2.2691	-0.79709
0.0645	-2.24544	-0.8319
0.0646	-2.31312	-0.85399
0.0647	-2.28945	-0.9353
0.0648	-2.19894	-1.00971
0.0649	-2.12254	-1.05179
0.065	-2.08808	-1.08624
0.0651	-2.12836	-1.09489
0.0652	-2.07023	-1.08828
0.0653	-2.09348	-1.10674
0.0654	-2.04158	-1.1797
0.0655	-2.05694	-1.14512
0.0656	-2.06275	-1.21626
0.0657	-2.04905	-1.22382
0.0658	-1.95023	-1.24083
0.0659	-1.91826	-1.2731
0.066	-1.92283	-1.33225
0.0661	-1.90705	-1.38668
0.0662	-1.8676	-1.45164
0.0663	-1.87881	-1.55003
0.0664	-1.81653	-1.68003
0.0665	-1.69779	-1.77115
0.0666	-1.65211	-1.82885
0.0667	-1.62554	-1.80444
0.0668	-1.64215	-1.83962
0.0669	-1.73183	-1.84355
0.067	-1.78249	-1.80388
0.0671	-1.65501	-1.7802
0.0672	-1.52007	-1.92037
0.0673	-1.54499	-1.98097
0.0674	-1.53918	-1.91805
0.0675	-1.55786	-1.89946
0.0676	-1.42126	-1.85397
0.0677	-1.36562	-1.83502
0.0678	-1.36729	-1.85384
0.0679	-1.44161	-1.8981
0.068	-1.47482	-1.90203
0.0681	-1.47026	-1.78607
0.0682	-1.4113	-1.65848
0.0683	-1.43662	-1.65333
0.0684	-1.40673	-1.57806
0.0685	-1.43538	-1.48244
0.0686	-1.46651	-1.39155
0.0687	-1.45862	-1.32826
0.0688	-1.32493	-1.30858
0.0689	-1.17462	-1.31941
0.069	-1.14348	-1.34805
0.0691	-1.1385	-1.46024
0.0692	-1.2232	-1.54301
0.0693	-1.26099	-1.47246
0.0694	-1.19455	-1.504
0.0695	-1.04591	-1.65434
0.0696	-1.04466	-1.68624
0.0697	-1.08037	-1.72142
0.0698	-1.07331	-1.72644
0.0699	-0.94044	-1.76561
0.07	-0.92051	-1.84583
0.0701	-0.88647	-1.79962
0.0702	-0.81131	-1.76323
0.0703	-0.77104	-1.7617
0.0704	-0.8192	-1.72749
0.0705	-0.7698	-1.70526
0.0706	-0.69091	-1.58893
0.0707	-0.6963	-1.6034
0.0708	-0.65063	-1.5997
0.0709	-0.72496	-1.64832
0.071	-0.83581	-1.56832
0.0711	-0.74904	-1.53883
0.0712	-0.86903	-1.44139
0.0713	-0.6988	-1.33706
0.0714	-0.55182	-1.36896
0.0715	-0.49909	-1.27117
0.0716	-0.6606	-1.17192
0.0717	-0.59625	-1.07667
0.0718	-0.58421	-1.11293
0.0719	-0.52816	-1.08525
0.072	-0.5867	-1.06847
0.0721	-0.50449	-1.00882
0.0722	-0.51155	-1.04073
0.0723	-0.49411	-1.2412
0.0724	-0.39155	-1.41552
0.0725	-0.22506	-1.48848
0.0726	-0.16111	-1.66062
0.0727	-0.15862	-1.70706
0.0728	-0.06437	-1.74259
0.0729	-0.01911	-1.79048
0.073	0.01037	-1.79877
0.0731	0.14697	-1.77182
0.0732	0.0797	-1.70273
0.0733	0.21631	-1.7052
0.0734	0.15818	-1.69678
0.0735	0.08926	-1.60116
0.0736	0.07805	-1.54878
0.0737	0.21673	-1.4677
0.0738	0.26946	-1.42585
0.0739	0.27278	-1.27828
0.074	0.31472	-1.12672
0.0741	0.26946	-0.95226
0.0742	0.15445	-0.76691
0.0743	0.21756	-0.67311
0.0744	0.10837	-0.52918
0.0745	0.00208	-0.44519
0.0746	-0.00332	-0.34339
0.0747	-0.07598	-0.19873
0.0748	-0.01951	-0.16015
0.0749	-0.0357	-0.02893
0.075	-0.07349	0.15569
0.0751	-0.05813	0.22697
0.0752	-0.18601	0.25573
0.0753	-0.14657	0.29903
0.0754	-0.07972	0.32889
0.0755	-0.03488	0.35403
0.0756	-0.02408	0.38025
0.0757	-0.0137	0.32764
0.0758	0.03903	0.28956
0.0759	0.00872	0.24312
0.076	0.1283	0.16871
0.0761	0.03321	0.18658
0.0762	0.08262	0.0871
0.0763	0.16733	-0.0458
0.0764	0.19349	-0.11476
0.0765	0.20885	-0.12632
0.0766	0.2595	-0.04414
0.0767	0.20594	0.04929
0.0768	0.20635	0.0163
0.0769	0.20926	-0.00216
0.077	0.18808	-0.0733
0.0771	0.15653	-0.19095
0.0772	0.14366	-0.16291
0.0773	0.2159	-0.09926
0.0774	0.12995	-0.18239
0.0775	0.10919	-0.18087
0.0776	-0.00707	-0.19861
0.0777	-0.027	-0.27956
0.0778	-0.02782	-0.32962
0.0779	-0.15031	-0.44291
0.078	-0.17896	-0.44502
0.0781	-0.25535	-0.42715
0.0782	-0.17854	-0.48522
0.0783	-0.19764	-0.36344
0.0784	-0.08803	-0.2413
0.0785	-0.0544	-0.22997
0.0786	-0.0461	-0.19503
0.0787	-0.0681	-0.24801
0.0788	-0.02866	-0.26574
0.0789	-0.04277	-0.34197
0.079	-0.05896	-0.4865
0.0791	-0.18228	-0.53475
0.0792	-0.16733	-0.57574
0.0793	-0.04982	-0.60146
0.0794	-0.08138	-0.64536
0.0795	-0.07764	-0.68271
0.0796	-0.13369	-0.85158
0.0797	-0.13992	-0.92599
0.0798	-0.11169	-0.97606
0.0799	-0.06186	-1.04248
0.08	0.04859	-0.95849
0.0801	0.00872	-0.91519
0.0802	0.02699	-0.97543
0.0803	0.03571	-1.03313
0.0804	0.05481	-1.0861
0.0805	-0.08013	-1.21392
0.0806	-0.21715	-1.21058
0.0807	-0.14532	-1.21923
0.0808	-0.25535	-1.20754
0.0809	-0.26033	-1.21401
0.081	-0.27237	-1.03556
0.0811	-0.37493	-0.84512
0.0812	-0.31556	-0.73062
0.0813	-0.40483	-0.6172
0.0814	-0.57465	-0.81477
0.0815	-0.57091	-0.79654
0.0816	-0.47417	-0.69184
0.0817	-0.42143	-0.48106
0.0818	-0.46544	-0.39016
0.0819	-0.51651	-0.30872
0.082	-0.64689	-0.22981
0.0821	-0.68924	-0.21085
0.0822	-0.65063	-0.19407
0.0823	-0.66973	-0.08465
0.0824	-0.71166	0.02876
0.0825	-0.67969	0.11857
0.0826	-0.74239	0.25669
0.0827	-0.68675	0.33741
0.0828	-0.76439	0.40178
0.0829	-0.64896	0.45925
0.083	-0.65062	0.48221
0.0831	-0.59125	0.49535
0.0832	-0.57422	0.59133
0.0833	-0.54848	0.55761
0.0834	-0.47831	0.57403
0.0835	-0.38448	0.79607
0.0836	-0.35168	0.75291
0.0837	-0.49243	0.84671
0.0838	-0.50406	0.78756
0.0839	-0.497	0.81051
0.084	-0.49327	0.87379
0.0841	-0.53977	0.99775
0.0842	-0.58959	1.07483
0.0843	-0.59332	1.1254
0.0844	-0.60951	1.1687
0.0845	-0.70667	1.11427
0.0846	-0.78971	1.01988
0.0847	-0.74653	1.00469
0.0848	-0.70003	1.00039
0.0849	-0.63692	0.97503
0.085	-0.67512	0.8672
0.0851	-0.73616	0.80695
0.0852	-0.75277	0.75761
0.0853	-0.65395	0.67194
0.0854	-0.57506	0.73449
0.0855	-0.5925	0.68152
0.0856	-0.59748	0.59803
0.0857	-0.61866	0.61662
0.0858	-0.55554	0.52368
0.0859	-0.61782	0.41149
0.086	-0.52482	0.31492
0.0861	-0.51776	0.11444
0.0862	-0.33632	-0.09621
0.0863	-0.30975	-0.25818
0.0864	-0.28608	-0.43395
0.0865	-0.30061	-0.6199
0.0866	-0.18228	-0.79312
0.0867	-0.1499	-0.89224
0.0868	-0.04236	-1.15411
0.0869	-0.11003	-1.3862
0.087	-0.22172	-1.57687
0.0871	-0.26657	-1.67344
0.0872	-0.25701	-1.76892
0.0873	-0.2786	-1.85133
0.0874	-0.37286	-1.95444
0.0875	-0.49327	-2.14111
0.0876	-0.54475	-2.29871
0.0877	-0.5788	-2.29356
0.0878	-0.54185	-2.37524
0.0879	-0.53355	-2.51105
0.088	-0.43639	-2.40562
0.0881	-0.4559	-2.40883
0.0882	-0.49576	-2.29287
0.0883	-0.49618	-2.23867
0.0884	-0.46628	-2.2277
0.0885	-0.48372	-2.24071
0.0886	-0.57258	-2.18506
0.0887	-0.61659	-2.17736
0.0888	-0.57382	-2.16676
0.0889	-0.66226	-2.16306
0.089	-0.60787	-2.17135
0.0891	-0.52317	-2.15457
0.0892	-0.40151	-2.17666
0.0893	-0.41978	-2.20239
0.0894	-0.37909	-2.29315
0.0895	-0.37535	-2.4969
0.0896	-0.2865	-2.46522
0.0897	-0.19889	-2.37615
0.0898	-0.14325	-2.38298
0.0899	-0.19141	-2.38837
0.09	-0.12415	-2.3378
0.0901	-0.25079	-2.35299
0.0902	-0.2649	-2.31405
0.0903	-0.1449	-2.23151
0.0904	-0.11169	-2.16242
0.0905	-0.06477	-2.09441
0.0906	-0.08594	-1.97155
0.0907	0.01495	-1.9188
0.0908	0.05564	-1.80866
0.0909	0.07225	-1.79006
0.091	0.07308	-1.6741
0.0911	-0.01494	-1.62099
0.0912	-0.06892	-1.62928
0.0913	-0.05647	-1.51804
0.0914	0.08512	-1.47038
0.0915	0.00208	-1.34207
0.0916	0.01993	-1.16907
0.0917	0.03737	-1.15302
0.0918	-0.00208	-1.20309
0.0919	-0.02949	-1.31128
0.092	0.04068	-1.37625
0.0921	0.05978	-1.40815
0.0922	0.17064	-1.45168
0.0923	0.18226	-1.51447
0.0924	0.12912	-1.61322
0.0925	0.03196	-1.67455
0.0926	-0.02119	-1.71517
0.0927	-1.42857e-05	-1.79976
0.0928	-0.00458	-1.80768
0.0929	-0.10091	-1.79272
0.093	-0.13911	-1.82281
0.0931	-0.08306	-1.80566
0.0932	0.02448	-1.73584
0.0933	0.05188	-1.6068
0.0934	0.02905	-1.59656
0.0935	0.00538	-1.55871
0.0936	0.10296	-1.64402
0.0937	0.10213	-1.63378
0.0938	0.06974	-1.65987
0.0939	0.14905	-1.58533
0.094	0.2296	-1.49698
0.0941	0.1777	-1.43842
0.0942	0.11708	-1.43617
0.0943	0.13451	-1.50041
0.0944	0.20427	-1.50361
0.0945	0.16898	-1.53225
0.0946	0.18766	-1.72982
0.0947	0.23084	-1.84056
0.0948	0.22794	-1.94076
0.0949	0.22379	-1.98575
0.095	0.24662	-2.03473
0.0951	0.31015	-1.96345
0.0952	0.32012	-1.94159
0.0953	0.3085	-2.05705
0.0954	0.33175	-2.12129
0.0955	0.31348	-2.13394
0.0956	0.30268	-2.18582
0.0957	0.19265	-2.14797
0.0958	0.26074	-2.15117
0.0959	0.19846	-2.11441
0.096	0.137	-2.21571
0.0961	0.05355	-2.15206
0.0962	-0.01828	-2.15418
0.0963	-0.07391	-2.08508
0.0964	-0.17647	-2.0287
0.0965	-0.19432	-1.95234
0.0966	-0.15861	-1.89233
0.0967	-0.2047	-1.73423
0.0968	-0.25536	-1.65859
0.0969	-0.21218	-1.50557
0.097	-0.25868	-1.45646
0.0971	-0.22131	-1.47092
0.0972	-0.34879	-1.44543
0.0973	-0.43224	-1.42283
0.0974	-0.502	-1.31487
0.0975	-0.5294	-1.21671
0.0976	-0.61742	-1.13126
0.0977	-0.75237	-0.96517
0.0978	-0.72828	-0.80452
0.0979	-0.80343	-0.69437
0.098	-0.72039	-0.60711
0.0981	-0.71914	-0.48679
0.0982	-0.67596	-0.43877
0.0983	-0.64399	-0.36749
0.0984	-0.6058	-0.37215
0.0985	-0.53936	-0.26018
0.0986	-0.61867	-0.28845
0.0987	-0.6577	-0.28185
0.0988	-0.62323	-0.23891
0.0989	-0.65438	-0.28862
0.099	-0.74406	-0.37901
0.0991	-0.76358	-0.34371
0.0992	-0.76773	-0.30259
0.0993	-0.74365	-0.38245
0.0994	-0.6494	-0.51535
0.0995	-0.67555	-0.54689
0.0996	-0.66518	-0.68815
0.0997	-0.66434	-0.81778
0.0998	-0.60414	-0.98302
0.0999	-0.57923	-1.1904
0.1	-0.54975	-1.26517
0.1001	-0.64649	-1.32904
0.1002	-0.76109	-1.31844
0.1003	-0.83084	-1.37214
0.1004	-0.75652	-1.42694
0.1005	-0.79057	-1.49009
0.1006	-0.88358	-1.54706
0.1007	-0.9143	-1.44636
0.1008	-0.97908	-1.43793
0.1009	-1.02724	-1.4266
0.101	-1.01063	-1.2972
0.1011	-1.02059	-1.18414
0.1012	-1.00689	-1.2353
0.1013	-1.07955	-1.33224
0.1014	-1.09034	-1.30493
0.1015	-1.15429	-1.17734
0.1016	-1.06875	-1.21106
0.1017	-1.10114	-1.21099
0.1018	-1.09865	-1.11501
0.1019	-1.1576	-1.14619
0.102	-1.22071	-1.08
0.1021	-1.32493	-1.02071
0.1022	-1.27677	-0.93636
0.1023	-1.19539	-0.86182
0.1024	-1.12148	-0.81743
0.1025	-1.2066	-0.71999
0.1026	-1.14307	-0.64254
0.1027	-1.09241	-0.52695
0.1028	-1.04508	-0.5752
0.1029	-0.96037	-0.51519
0.103	-1.01103	-0.46862
0.1031	-1.08078	-0.5027
0.1032	-1.09573	-0.50263
0.1033	-1.0268	-0.44625
0.1034	-0.90557	-0.32557
0.1035	-0.84204	-0.28082
0.1036	-0.90349	-0.31163
0.1037	-1.01352	-0.17859
0.1038	-0.99151	-0.04229
0.1039	-0.92508	-0.02224
0.104	-0.80923	0.1573
0.1041	-0.76688	0.2689
0.1042	-0.71249	0.26098
0.1043	-0.82999	0.24688
0.1044	-0.79927	0.26474
0.1045	-0.89518	0.27135
0.1046	-0.89767	0.28704
0.1047	-1.00271	0.3238
0.1048	-0.96036	0.25811
0.1049	-1.00437	0.25381
0.105	-1.04548	0.22446
0.1051	-0.99316	0.21944
0.1052	-0.95289	0.29253
0.1053	-0.84244	0.30822
0.1054	-0.90804	0.30683
0.1055	-0.967	0.25749
0.1056	-0.94582	0.24956
0.1057	-0.95205	0.33718
0.1058	-0.90222	0.40592
0.1059	-0.84036	0.386
0.106	-0.83912	0.35918
0.1061	-0.95206	0.37524
0.1062	-0.97946	0.34697
0.1063	-0.90057	0.3216
0.1064	-0.70044	0.27371
0.1065	-0.72826	0.16224
0.1066	-0.71913	0.11617
0.1067	-0.65851	0.05629
0.1068	-0.57713	-0.0054
0.1069	-0.63318	-0.03222
0.107	-0.66474	-0.01798
0.1071	-0.63401	-0.05861
0.1072	-0.63401	-0.0342
0.1073	-0.67138	-0.06356
0.1074	-0.74695	-0.16122
0.1075	-0.65311	-0.18731
0.1076	-0.56426	-0.18506
0.1077	-0.60246	-0.20207
0.1078	-0.53728	-0.29901
0.1079	-0.56717	-0.40139
0.108	-0.62198	-0.38534
0.1081	-0.69131	-0.38128
0.1082	-0.62571	-0.45642
0.1083	-0.63941	-0.53083
0.1084	-0.68135	-0.58853
0.1085	-0.80965	-0.67093
0.1086	-0.85616	-0.72136
0.1087	-0.86322	-0.79686
0.1088	-0.93422	-0.84947
0.1089	-0.95789	-0.87847
0.109	-0.99692	-0.87077
0.1091	-0.97616	-0.88887
0.1092	-0.9936	-0.90952
0.1093	-1.03512	-0.99337
0.1094	-1.04758	-1.05107
0.1095	-1.0509	-1.03284
0.1096	-1.11442	-1.09163
0.1097	-1.27593	-1.10064
0.1098	-1.32866	-1.08205
0.1099	-1.33074	-1.06236
0.11	-1.38056	-0.9682
0.1101	-1.44035	-0.98194
0.1102	-1.44907	-0.95281
0.1103	-1.54914	-0.96691
0.1104	-1.56658	-0.91852
0.1105	-1.58484	-0.80728
0.1106	-1.50429	-0.65208
0.1107	-1.45571	-0.57354
0.1108	-1.47813	-0.47575
0.1109	-1.44367	-0.33436
0.111	-1.47066	-0.24528
0.1111	-1.43287	-0.30697
0.1112	-1.31122	-0.28693
0.1113	-1.34319	-0.18768
0.1114	-1.29544	-0.12984
0.1115	-1.22859	-0.06293
0.1116	-1.19953	-0.03198
0.1117	-1.29586	0.04402
0.1118	-1.1879	0.01865
0.1119	-1.14763	0.00746
0.112	-1.08245	0.02024
0.1121	-1.00813	-0.05308
0.1122	-0.99567	-0.08825
0.1123	-1.02224	-0.10962
0.1124	-0.85533	-0.11573
0.1125	-0.79595	-0.16507
0.1126	-0.86945	-0.20206
0.1127	-0.98156	-0.28338
0.1128	-0.95374	-0.32872
0.1129	-0.86447	-0.38751
0.113	-0.7532	-0.48663
0.1131	-0.666	-0.56104
0.1132	-0.68136	-0.58749
0.1133	-0.76606	-0.73711
0.1134	-0.7918	-0.91615
0.1135	-0.70752	-1.08211
0.1136	-0.72579	-1.20993
0.1137	-0.65105	-1.25019
0.1138	-0.48081	-1.32242
0.1139	-0.49369	-1.30419
0.114	-0.5078	-1.28813
0.1141	-0.60413	-1.31095
0.1142	-0.67886	-1.27274
0.1143	-0.61783	-1.23089
0.1144	-0.50572	-1.25553
0.1145	-0.60662	-1.19443
0.1146	-0.56676	-1.11443
0.1147	-0.44428	-1.09911
0.1148	-0.31431	-1.08633
0.1149	-0.3193	-1.0245
0.115	-0.33383	-1.04296
0.1151	-0.47084	-0.98985
0.1152	-0.5435	-0.9985
0.1153	-0.5788	-0.91524
0.1154	-0.4858	-0.81091
0.1155	-0.40566	-0.68731
0.1156	-0.42352	-0.60005
0.1157	-0.45217	-0.56656
0.1158	-0.48705	-0.47894
0.1159	-0.51819	-0.44
0.116	-0.54268	-0.33966
0.1161	-0.51279	-0.29236
0.1162	-0.4858	-0.18948
0.1163	-0.31889	-0.15417
0.1164	-0.26948	-0.12395
0.1165	-0.25578	-0.04396
0.1166	-0.15654	-0.04026
0.1167	-0.1582	-0.07725
0.1168	-0.16526	-0.16656
0.1169	-0.2375	-0.19882
0.117	-0.25287	-0.19222
0.1171	-0.23419	-0.2005
0.1172	-0.22215	-0.31125
0.1173	-0.20139	-0.27994
0.1174	-0.17648	-0.26425
0.1175	-0.29689	-0.25074
0.1176	-0.35335	-0.20998
0.1177	-0.431	-0.24116
0.1178	-0.4447	-0.21675
0.1179	-0.45425	-0.37654
0.118	-0.46837	-0.47892
0.1181	-0.43598	-0.56532
0.1182	-0.41605	-0.60159
0.1183	-0.42934	-0.68435
0.1184	-0.49328	-0.74387
0.1185	-0.48747	-0.82736
0.1186	-0.55722	-0.90649
0.1187	-0.66932	-0.96237
0.1188	-0.73783	-0.97284
0.1189	-0.80842	-0.83581
0.119	-0.77396	-0.7362
0.1191	-0.72164	-0.73613
0.1192	-0.71209	-0.61472
0.1193	-0.64233	-0.50058
0.1194	-0.66558	-0.458
0.1195	-0.56302	-0.40526
0.1196	-0.49534	-0.37685
0.1197	-0.39237	-0.47778
0.1198	-0.37078	-0.37781
0.1199	-0.25826	-0.42134
0.12	-0.29314	-0.3239
0.1201	-0.29937	-0.31003
0.1202	-0.28525	-0.33685
0.1203	-0.33632	-0.41889
0.1204	-0.30477	-0.49839
0.1205	-0.24913	-0.57607
0.1206	-0.32802	-0.64466
0.1207	-0.25744	-0.75105
0.1208	-0.13578	-0.78912
0.1209	-0.05191	-0.849
0.121	0.04982	-0.99862
0.1211	0.08304	-1.07593
0.1212	0.07224	-1.04753
0.1213	0.071	-1.10813
0.1214	0.13037	-1.17237
0.1215	0.24704	-1.23952
0.1216	0.17313	-1.43818
0.1217	0.14614	-1.48716
0.1218	0.0303	-1.4355
0.1219	0.02324	-1.47504
0.122	-0.00209	-1.45462
0.1221	0.05562	-1.38044
0.1222	0.12372	-1.28919
0.1223	0.05812	-1.21791
0.1224	0.17147	-1.16626
0.1225	0.18144	-1.06156
0.1226	0.1723	-0.97103
0.1227	0.18809	-0.83545
0.1228	0.17438	-0.71476
0.1229	0.0685	-0.68164
0.123	-0.00126	-0.62744
0.1231	0.04524	-0.57069
0.1232	-0.07849	-0.48271
0.1233	-0.13538	-0.45212
0.1234	-0.13911	-0.45206
0.1235	-0.28319	-0.49813
0.1236	-0.47169	-0.40978
0.1237	-0.46795	-0.29818
0.1238	-0.50116	-0.35224
0.1239	-0.4721	-0.39577
0.124	-0.46047	-0.42368
0.1241	-0.46212	-0.41489
0.1242	-0.49202	-0.48349
0.1243	-0.56966	-0.61131
0.1244	-0.51651	-0.68681
0.1245	-0.57506	-0.71181
0.1246	-0.64273	-0.71646
0.1247	-0.71249	-0.69896
0.1248	-0.75982	-0.72142
0.1249	-0.77519	-0.71517
0.125	-0.70211	-0.68931
0.1251	-0.68924	-0.63402
0.1252	-0.78017	-0.57655
0.1253	-0.71913	-0.64878
0.1254	-0.67968	-0.69086
0.1255	-0.72203	-0.63702
0.1256	-0.68508	-0.55085
0.1257	-0.54266	-0.53734
0.1258	-0.49367	-0.49404
0.1259	-0.39111	-0.39916
0.126	-0.40357	-0.31807
0.1261	-0.41354	-0.19194
0.1262	-0.4563	-0.10177
0.1263	-0.48661	-0.0621
0.1264	-0.497	0.08946
0.1265	-0.58668	0.1829
0.1266	-0.5925	0.15753
0.1267	-0.55803	0.2259
0.1268	-0.61326	0.24014
0.1269	-0.58917	0.25546
0.127	-0.58377	0.34526
0.1271	-0.71705	0.38784
0.1272	-0.7677	0.38573
0.1273	-0.75816	0.38943
0.1274	-0.73657	0.42146
0.1275	-0.781	0.39901
0.1276	-0.84868	0.40489
0.1277	-0.94044	0.35954
0.1278	-1.02929	0.26805
0.1279	-1.06541	0.21326
0.128	-1.18209	0.18317
0.1281	-1.12437	0.15418
0.1282	-1.14845	0.06996
0.1283	-1.15842	0.05331
0.1284	-1.19952	0.06355
0.1285	-1.24603	0.11739
0.1286	-1.1962	0.12872
0.1287	-1.17337	0.2563
0.1288	-1.15136	0.22585
0.1289	-1.08908	0.20848
0.129	-1.05794	0.27358
0.1291	-1.13144	0.29363
0.1292	-0.95165	0.4303
0.1293	-0.9093	0.46052
0.1294	-0.94584	0.54596
0.1295	-0.90889	0.60852
0.1296	-0.8848	0.75245
0.1297	-0.76273	0.76524
0.1298	-0.71042	0.8732
0.1299	-0.6606	1.01423
0.13	-0.69672	1.15708
0.1301	-0.63984	1.15424
0.1302	-0.65479	1.1841
0.1303	-0.59417	1.18053
0.1304	-0.60704	1.16825
0.1305	-0.49535	1.17558
0.1306	-0.47708	1.18219
0.1307	-0.52316	1.16954
0.1308	-0.568	1.0588
0.1309	-0.568	1.03815
0.131	-0.6062	1.02442
0.1311	-0.65395	0.97035
0.1312	-0.67222	0.96024
0.1313	-0.80218	0.79029
0.1314	-0.82501	0.7602
0.1315	-0.82833	0.71195
0.1316	-0.75733	0.66624
0.1317	-0.73283	0.52716
0.1318	-0.73532	0.54684
0.1319	-0.71207	0.42593
0.132	-0.7046	0.32027
0.1321	-0.63152	0.25204
0.1322	-0.65934	0.28371
0.1323	-0.65395	0.22892
0.1324	-0.64357	0.30565
0.1325	-0.6307	0.36748
0.1326	-0.69049	0.40533
0.1327	-0.6199	0.22846
0.1328	-0.61284	0.11954
0.1329	-0.6253	0.09454
0.133	-0.61492	0.03175
0.1331	-0.49492	-0.06518
0.1332	-0.42641	-0.19845
0.1333	-0.3579	-0.42036
0.1334	-0.32801	-0.48278
0.1335	-0.29189	-0.59062
0.1336	-0.26781	-0.64286
0.1337	-0.4422	-0.68676
0.1338	-0.44095	-0.646
0.1339	-0.40732	-0.62014
0.134	-0.3878	-0.49146
0.1341	-0.33383	-0.44126
0.1342	-0.34296	-0.40922
0.1343	-0.42559	-0.3038
0.1344	-0.41271	-0.26268
0.1345	-0.39237	-0.30439
0.1346	-0.39652	-0.38352
0.1347	-0.3957	-0.51425
0.1348	-0.39653	-0.38194
0.1349	-0.32179	-0.27651
0.135	-0.32719	-0.11913
0.1351	-0.3903	-0.03405
0.1352	-0.45923	0.05466
0.1353	-0.53604	0.14156
0.1354	-0.52151	0.25134
0.1355	-0.51694	0.26158
0.1356	-0.50906	0.37064
0.1357	-0.50034	0.33256
0.1358	-0.44262	0.26977
0.1359	-0.51238	0.22152
0.136	-0.66351	0.13403
0.1361	-0.71334	0.06398
0.1362	-0.7997	0.07277
0.1363	-0.84288	0.02452
0.1364	-0.77894	-0.07496
0.1365	-0.79555	-0.17916
0.1366	-0.92011	-0.24449
0.1367	-1.01104	-0.28185
0.1368	-1.11235	-0.27451
0.1369	-1.20909	-0.3482
0.137	-1.33739	-0.3761
0.1371	-1.46942	-0.47413
0.1372	-1.50098	-0.53946
0.1373	-1.54956	-0.5848
0.1374	-1.60229	-0.58074
0.1375	-1.7173	-0.59521
0.1376	-1.78913	-0.61803
0.1377	-1.71771	-0.66664
0.1378	-1.71107	-0.73488
0.1379	-1.64505	-0.85724
0.138	-1.54458	-0.99959
0.1381	-1.47897	-1.02496
0.1382	-1.46236	-1.07357
0.1383	-1.45489	-1.23954
0.1384	-1.45489	-1.33102
0.1385	-1.40216	-1.36075
0.1386	-1.41461	-1.30873
0.1387	-1.39883	-1.31738
0.1388	-1.31952	-1.38452
0.1389	-1.19455	-1.38845
0.139	-1.1605	-1.37276
0.1391	-1.0239	-1.40067
0.1392	-0.82668	-1.47544
0.1393	-0.75194	-1.48882
0.1394	-0.73866	-1.53925
0.1395	-0.54185	-1.54282
0.1396	-0.47667	-1.5046
0.1397	-0.28027	-1.43733
0.1398	-0.31266	-1.46596
0.1399	-0.33176	-1.4826
0.14	-0.39362	-1.34012
0.1401	-0.40151	-1.26376
0.1402	-0.35874	-1.26115
0.1403	-0.40068	-1.22875
0.1404	-0.32802	-1.18981
0.1405	-0.35335	-1.12762
0.1406	-0.44802	-1.15516
0.1407	-0.46629	-1.13911
0.1408	-0.40193	-1.07801
0.1409	-0.34173	-1.09066
0.141	-0.44553	-1.14581
0.1411	-0.48954	-1.15882
0.1412	-0.54974	-1.17002
0.1413	-0.61991	-1.0239
0.1414	-0.68053	-0.97443
0.1415	-0.69382	-0.84684
0.1416	-0.81838	-0.82025
0.1417	-0.80675	-0.84307
0.1418	-0.9255	-0.86081
0.1419	-0.92219	-0.84221
0.142	-0.97491	-0.71099
0.1421	-1.01477	-0.62083
0.1422	-0.96246	-0.61495
0.1423	-1.01851	-0.57019
0.1424	-0.93464	-0.71472
0.1425	-0.83499	-0.80439
0.1426	-0.75859	-0.87698
0.1427	-0.72993	-0.89218
0.1428	-0.7316	-0.95569
0.1429	-0.70544	-1.06171
0.143	-0.666	-0.95446
0.1431	-0.62364	-0.88828
0.1432	-0.54434	-0.8962
0.1433	-0.58004	-0.84563
0.1434	-0.53894	-0.9542
0.1435	-0.41687	-0.98465
0.1436	-0.3658	-1.09611
0.1437	-0.32635	-1.20068
0.1438	-0.29895	-1.29035
0.1439	-0.23002	-1.35241
0.144	-0.24995	-1.50638
0.1441	-0.17605	-1.64219
0.1442	-0.08013	-1.82269
0.1443	-0.1449	-1.90836
0.1444	-0.10463	-2.08922
0.1445	-0.08221	-2.05246
0.1446	-0.2213	-1.92124
0.1447	-0.33715	-1.88993
0.1448	-0.2101	-1.87642
0.1449	-0.05273	-1.87562
0.145	0.01869	-1.79381
0.1451	-0.02781	-1.77631
0.1452	-0.00249	-1.71484
0.1453	-0.02325	-1.63775
0.1454	0.09176	-1.69836
0.1455	0.1474	-1.67795
0.1456	0.1748	-1.65209
0.1457	0.18518	-1.56483
0.1458	0.17106	-1.43361
0.1459	0.19349	-1.32164
0.146	0.1611	-1.24201
0.1461	0.19847	-1.10897
0.1462	0.19764	-1.01154
0.1463	0.17605	-0.91774
0.1464	0.1856	-0.82213
0.1465	0.20885	-0.68219
0.1466	0.12207	-0.58584
0.1467	0.18642	-0.53419
0.1468	0.25576	-0.56355
0.1469	0.13286	-0.56494
0.147	-0.0054	-0.46351
0.1471	-0.11419	-0.42311
0.1472	-0.16485	-0.38526
0.1473	-0.13786	-0.33361
0.1474	-0.12623	-0.37241
0.1475	-0.19806	-0.32839
0.1476	-0.28484	-0.35266
0.1477	-0.38615	-0.33625
0.1478	-0.36248	-0.40775
0.1479	-0.33259	-0.4422
0.148	-0.34629	-0.49118
0.1481	-0.40566	-0.46858
0.1482	-0.50364	-0.39477
0.1483	-0.497	-0.35038
0.1484	-0.46461	-0.30526
0.1485	-0.5053	-0.25615
0.1486	-0.49534	-0.24591
0.1487	-0.47707	-0.22913
0.1488	-0.59457	-0.27193
0.1489	-0.47831	-0.2388
0.149	-0.44261	-0.22711
0.1491	-0.36455	-0.16928
0.1492	-0.4044	-0.21753
0.1493	-0.34379	-0.31047
0.1494	-0.34835	-0.46299
0.1495	-0.27403	-0.56174
0.1496	-0.27278	-0.61072
0.1497	-0.16192	-0.55216
0.1498	-0.1092	-0.57971
0.1499	-0.12788	-0.56983
0.15	-0.20137	-0.48148
0.1501	-0.19182	-0.42619
0.1502	-0.21051	-0.44611
0.1503	-0.16609	-0.41007
0.1504	-0.1117	-0.46922
0.1505	-0.14201	-0.50476
0.1506	-0.1034	-0.45347
0.1507	-0.15031	-0.44722
0.1508	-0.14616	-0.47368
0.1509	-0.04734	-0.37625
0.151	-0.19142	-0.26864
0.1511	-0.26242	-0.20717
0.1512	-0.3683	-0.2656
0.1513	-0.25827	-0.2263
0.1514	-0.1852	-0.17791
0.1515	-0.14741	0.00308
0.1516	-0.19973	0.08308
0.1517	-0.12956	0.2252
0.1518	-0.16153	0.23834
0.1519	-0.18354	0.21661
0.152	-0.27322	0.21922
0.1521	-0.23087	0.05072
0.1522	-0.2616	-0.00335
0.1523	-0.20014	-0.03489
0.1524	-0.10963	-0.13473
0.1525	-0.13828	-0.11469
0.1526	-0.13661	-0.03578
0.1527	-0.11917	-0.02227
0.1528	-0.14491	-0.01821
0.1529	-0.05108	0.04907
0.153	-0.08305	0.06875
0.1531	-0.03655	0.10116
0.1532	0.0137	0.13792
0.1533	0.10255	0.20338
0.1534	0.08968	0.28773
0.1535	0.0465	0.37354
0.1536	0.02408	0.35217
0.1537	0.05937	0.47649
0.1538	-0.01204	0.44567
0.1539	-0.07308	0.45591
0.154	-0.08346	0.52573
0.1541	-0.00374	0.57303
0.1542	0.01869	0.64285
0.1543	0.03529	0.66617
0.1544	0.0764	0.67241
0.1545	0.0602	0.65976
0.1546	0.08262	0.72159
0.1547	0.03861	0.6777
0.1548	0.01287	0.61346
0.1549	0.03322	0.60481
0.155	0.04526	0.59398
0.1551	-0.00705	0.55626
0.1552	0.01828	0.47858
0.1553	0.05232	0.41398
0.1554	0.05315	0.31922
0.1555	0.06934	0.2568
0.1556	0.05273	0.16968
0.1557	0.071	0.19372
0.1558	0.14781	0.12185
0.1559	0.17189	0.13246
0.156	0.17812	0.21717
0.1561	0.15736	0.30044
0.1562	0.16608	0.32521
0.1563	0.16981	0.40738
0.1564	0.27154	0.50118
0.1565	0.24746	0.56737
0.1566	0.2184	0.67352
0.1567	0.13037	0.60057
0.1568	0.23791	0.53742
0.1569	0.32302	0.50333
0.157	0.36122	0.59677
0.1571	0.31222	0.61282
0.1572	0.36412	0.62779
0.1573	0.39817	0.60351
0.1574	0.39443	0.5974
0.1575	0.39443	0.58984
0.1576	0.42848	0.52597
0.1577	0.42267	0.53911
0.1578	0.43471	0.44436
0.1579	0.37741	0.35141
0.158	0.40399	0.28936
0.1581	0.48288	0.22548
0.1582	0.52689	0.11946
0.1583	0.57879	0.07448
0.1584	0.54682	-0.03771
0.1585	0.51277	-0.09795
0.1586	0.45464	-0.14257
0.1587	0.47872	-0.21589
0.1588	0.46212	-0.23981
0.1589	0.46336	-0.17471
0.159	0.35998	-0.14049
0.1591	0.34379	-0.23415
0.1592	0.30476	-0.18105
0.1593	0.2977	-0.2224
0.1594	0.32843	-0.12896
0.1595	0.32718	-0.1427
0.1596	0.30767	-0.16588
0.1597	0.15944	-0.19125
0.1598	0.26614	-0.17883
0.1599	0.17106	-0.18712
0.16	0.11958	-0.07079
0.1601	0.14117	-0.07726
0.1602	0.04941	-0.09827
0.1603	0.04152	-0.17304
0.1604	-0.00623	-0.2282
0.1605	0.00664	-0.19689
0.1606	-0.0328	-0.22116
0.1607	0.04734	-0.20874
0.1608	0.09093	-0.21158
0.1609	0.1557	-0.12759
0.161	0.09675	-0.1446
0.1611	0.12955	-0.11837
0.1612	0.18975	-0.14737
0.1613	0.25535	-0.23595
0.1614	0.32594	-0.28457
0.1615	0.27445	-0.37787
0.1616	0.28234	-0.3313
0.1617	0.20844	-0.20771
0.1618	0.2728	-0.14515
0.1619	0.15945	-0.11566
0.162	0.21633	-0.05456
0.1621	0.2292	-0.09191
0.1622	0.15114	-0.13907
0.1623	0.09799	-0.10268
0.1624	0.10547	0.02745
0.1625	0.12373	0.16158
0.1626	0.11958	0.22305
0.1627	0.0627	0.3034
0.1628	0.02865	0.25697
0.1629	-0.13494	0.21598
0.163	-0.18352	0.13794
0.1631	-0.16899	0.14963
0.1632	-0.25618	0.22962
0.1633	-0.306	0.2831
0.1634	-0.37576	0.24683
0.1635	-0.5381	0.30139
0.1636	-0.55679	0.36068
0.1637	-0.59167	0.41742
0.1638	-0.61202	0.38552
0.1639	-0.67222	0.44008
0.164	-0.666	0.38456
0.1641	-0.70254	0.36792
0.1642	-0.7071	0.47443
0.1643	-0.6523	0.60711
0.1644	-0.65769	0.53669
0.1645	-0.69963	0.51823
0.1646	-0.69838	0.51466
0.1647	-0.70129	0.48567
0.1648	-0.65562	0.43342
0.1649	-0.55929	0.53666
0.165	-0.56054	0.62792
0.1651	-0.58628	0.67013
0.1652	-0.72289	0.48527
0.1653	-0.60165	0.23902
0.1654	-0.5049	0.14681
0.1655	-0.48373	0.16141
0.1656	-0.3712	0.06701
0.1657	-0.42767	-0.08151
0.1658	-0.36912	-0.19116
0.1659	-0.26532	-0.36439
0.166	-0.21923	-0.48494
0.1661	-0.27321	-0.543
0.1662	-0.28816	-0.6839
0.1663	-0.262	-0.83497
0.1664	-0.29023	-1.0151
0.1665	-0.24871	-1.07316
0.1666	-0.17564	-1.22314
0.1667	-0.12374	-1.33533
0.1668	-0.1038	-1.44244
0.1669	-0.09218	-1.5332
0.167	-0.23916	-1.67918
0.1671	-0.13951	-1.69037
0.1672	-0.04733	-1.73136
0.1673	0.10879	-1.57108
0.1674	0.07723	-1.50416
0.1675	-0.02284	-1.41945
0.1676	0.11086	-1.34926
0.1677	0.07473	-1.25946
0.1678	0.08179	-1.15476
0.1679	-0.02866	-1.20338
0.168	-0.08014	-1.1143
0.1681	-0.09301	-1.13494
0.1682	-0.11959	-1.11707
0.1683	-0.06851	-1.07268
0.1684	-0.13536	-1.14273
0.1685	-0.07059	-1.07945
0.1686	-0.0955	-1.02925
0.1687	-0.12125	-1.08113
0.1688	-0.24166	-1.05309
0.1689	-0.29065	-1.02578
0.169	-0.29896	-0.9723
0.1691	-0.27737	-1.00639
0.1692	-0.30477	-1.06663
0.1693	-0.34795	-1.09308
0.1694	-0.38366	-1.13116
0.1695	-0.43888	-1.05371
0.1696	-0.45507	-1.11359
0.1697	-0.65271	-1.23741
0.1698	-0.67098	-1.32018
0.1699	-0.61534	-1.33355
0.17	-0.57009	-1.23757
0.1701	-0.5431	-1.16266
0.1702	-0.50199	-1.0151
0.1703	-0.44345	-1.0034
0.1704	-0.45424	-1.02368
0.1705	-0.43847	-0.91281
0.1706	-0.47584	-0.87532
0.1707	-0.43764	-0.84219
0.1708	-0.51694	-0.65175
0.1709	-0.56345	-0.54379
0.171	-0.60455	-0.41583
0.1711	-0.59417	-0.35764
0.1712	-0.63984	-0.23078
0.1713	-0.72455	-0.13771
0.1714	-0.73576	-0.000311219
0.1715	-0.69548	0.10512
0.1716	-0.5622	0.13207
0.1717	-0.56345	0.24294
0.1718	-0.4804	0.39959
0.1719	-0.4584	0.47014
0.172	-0.5269	0.5029
0.1721	-0.46628	0.49244
0.1722	-0.43514	0.44636
0.1723	-0.39652	0.34834
0.1724	-0.39237	0.35894
0.1725	-0.34213	0.38008
0.1726	-0.32096	0.38451
0.1727	-0.35999	0.31627
0.1728	-0.33715	0.25167
0.1729	-0.27902	0.17435
0.173	-0.15487	0.10285
0.1731	-0.09508	0.04551
0.1732	-0.1146	0.04449
0.1733	-0.02699	0.01331
0.1734	0.04485	-0.08653
0.1735	0.06436	-0.14059
0.1736	0.06851	-0.20483
0.1737	-0.00498	-0.14155
0.1738	0.00125	-0.14185
0.1739	0.02866	-0.25259
0.174	0.01246	-0.21437
0.1741	-0.00539	-0.22048
0.1742	-0.0382	-0.24258
0.1743	-0.09674	-0.32571
0.1744	-0.08969	-0.30602
0.1745	-0.13577	-0.30305
0.1746	-0.18269	-0.22887
0.1747	-0.23251	-0.33162
0.1748	-0.09964	-0.29267
0.1749	-0.11667	-0.24611
0.175	-0.1694	-0.24095
0.1751	-0.24496	-0.23362
0.1752	-0.2487	-0.23573
0.1753	-0.24662	-0.26291
0.1754	-0.31223	-0.22942
0.1755	-0.32967	-0.16142
0.1756	-0.45299	-0.25799
0.1757	-0.47375	-0.27645
0.1758	-0.44551	-0.43006
0.1759	-0.41022	-0.52009
0.176	-0.49285	-0.4797
0.1761	-0.48123	-0.57264
0.1762	-0.43722	-0.59837
0.1763	-0.44095	-0.56342
0.1764	-0.4177	-0.49324
0.1765	-0.48206	-0.48808
0.1766	-0.51652	-0.49601
0.1767	-0.66475	-0.44072
0.1768	-0.70129	-0.3204
0.1769	-0.8599	-0.24586
0.177	-0.93546	-0.24543
0.1771	-0.94294	-0.20067
0.1772	-1.00937	-0.18426
0.1773	-1.06999	-0.20126
0.1774	-1.21988	-0.22445
0.1775	-1.26057	-0.25599
0.1776	-1.25518	-0.30424
0.1777	-1.18418	-0.31616
0.1778	-1.23608	-0.34189
0.1779	-1.22528	-0.39886
0.178	-1.25974	-0.45438
0.1781	-1.26763	-0.50917
0.1782	-1.26763	-0.55597
0.1783	-1.26223	-0.6075
0.1784	-1.28756	-0.70734
0.1785	-1.3598	-0.76685
0.1786	-1.4445	-0.78059
0.1787	-1.35607	-0.74964
0.1788	-1.27344	-0.86583
0.1789	-1.18334	-0.95405
0.179	-1.18625	-1.02156
0.1791	-1.13103	-0.99061
0.1792	-1.11442	-1.08101
0.1793	-0.97616	-1.12381
0.1794	-0.87568	-1.12738
0.1795	-0.73825	-1.18326
0.1796	-0.67846	-1.22279
0.1797	-0.61618	-1.19039
0.1798	-0.56095	-1.11076
0.1799	-0.59417	-1.13213
0.18	-0.69672	-1.04559
0.1801	-0.7287	-1.06841
0.1802	-0.71748	-1.16499
0.1803	-0.6743	-1.17291
0.1804	-0.67014	-1.2495
0.1805	-0.6033	-1.23309
0.1806	-0.52565	-1.16036
0.1807	-0.43182	-1.22787
0.1808	-0.46877	-1.24487
0.1809	-0.30809	-1.36361
0.181	-0.26532	-1.3352
0.1811	-0.24165	-1.41361
0.1812	-0.22255	-1.44261
0.1813	-0.17647	-1.35208
0.1814	-0.11626	-1.33821
0.1815	-0.14532	-1.33596
0.1816	-0.15155	-1.20329
0.1817	-0.20927	-1.14691
0.1818	-0.34379	-1.13304
0.1819	-0.43804	-1.19219
0.182	-0.40026	-1.11183
0.1821	-0.355	-1.14555
0.1822	-0.27155	-1.10443
0.1823	-0.24082	-1.05713
0.1824	-0.21509	-0.99967
0.1825	-0.17398	-0.95455
0.1826	-0.20263	-0.96829
0.1827	-0.16194	-0.98348
0.1828	-0.11294	-0.88278
0.1829	-0.11668	-0.88634
0.183	-0.20388	-0.77438
0.1831	-0.24415	-0.81209
0.1832	-0.13952	-0.7895
0.1833	-0.14491	-0.70224
0.1834	-0.14118	-0.76939
0.1835	-0.25577	-0.80056
0.1836	-0.25203	-0.75254
0.1837	-0.2346	-0.80406
0.1838	-0.13868	-0.70917
0.1839	-0.05066	-0.63209
0.184	-0.05315	-0.44928
0.1841	-0.0108	-0.38563
0.1842	0.05273	-0.25877
0.1843	-0.0357	-0.12537
0.1844	-0.11335	-0.01668
0.1845	-0.17438	0.05351
0.1846	-0.1611	0.17855
0.1847	-0.13992	0.30178
0.1848	-0.15072	0.42501
0.1849	-0.19431	0.45341
0.185	-0.14989	0.50616
0.1851	-0.24206	0.62611
0.1852	-0.26988	0.73336
0.1853	-0.32428	0.81698
0.1854	-0.35625	0.81923
0.1855	-0.4314	0.91376
0.1856	-0.41313	0.94434
0.1857	-0.33964	0.98728
0.1858	-0.32096	1.02985
0.1859	-0.36248	0.90966
0.186	-0.37452	0.85814
0.1861	-0.28857	0.80953
0.1862	-0.333	0.75437
0.1863	-0.42186	0.77878
0.1864	-0.382	0.76068
0.1865	-0.33799	0.8454
0.1866	-0.38241	0.89705
0.1867	-0.37162	0.91347
0.1868	-0.38657	0.9139
0.1869	-0.40151	0.91215
0.187	-0.42684	0.95291
0.1871	-0.44429	0.99911
0.1872	-0.4119	0.97629
0.1873	-0.45549	0.92768
0.1874	-0.54227	0.88814
0.1875	-0.6087	0.73889
0.1876	-0.6004	0.63614
0.1877	-0.59043	0.57772
0.1878	-0.64482	0.47751
0.1879	-0.6361	0.41364
0.188	-0.66434	0.44132
0.1881	-0.64233	0.37672
0.1882	-0.68385	0.31429
0.1883	-0.7071	0.34161
0.1884	-0.65063	0.21016
0.1885	-0.6988	0.09833
0.1886	-0.61866	-0.01314
0.1887	-0.56136	-0.05703
0.1888	-0.60371	-0.10165
0.1889	-0.59624	-0.14773
0.189	-0.66641	-0.25556
0.1891	-0.6307	-0.31798
0.1892	-0.69256	-0.39748
0.1893	-0.57921	-0.44936
0.1894	-0.52524	-0.48345
0.1895	-0.47375	-0.39292
0.1896	-0.41438	-0.30457
0.1897	-0.30102	-0.25
0.1898	-0.3604	-0.20089
0.1899	-0.33009	-0.17103
0.19	-0.33009	-0.14553
0.1901	-0.28275	-0.06118
0.1902	-0.34296	-0.02442
0.1903	-0.30725	0.03886
0.1904	-0.28441	0.02403
0.1905	-0.33507	0.10475
0.1906	-0.3085	0.22944
0.1907	-0.41853	0.2553
0.1908	-0.48205	0.25791
0.1909	-0.51444	0.30484
0.191	-0.58793	0.40627
0.1911	-0.64896	0.42196
0.1912	-0.7482	0.46235
0.1913	-0.7648	0.47768
0.1914	-0.77768	0.51698
0.1915	-0.75899	0.57263
0.1916	-0.71871	0.51275
0.1917	-0.66889	0.55533
0.1918	-0.64938	0.63024
0.1919	-0.52481	0.63975
0.192	-0.55305	0.61475
0.1921	-0.55056	0.55778
0.1922	-0.54019	0.4365
0.1923	-0.58752	0.46454
0.1924	-0.52482	0.50639
0.1925	-0.42019	0.5268
0.1926	-0.42558	0.56501
0.1927	-0.46088	0.55563
0.1928	-0.44136	0.5161
0.1929	-0.39694	0.58265
0.193	-0.40068	0.57618
0.1931	-0.33881	0.46399
0.1932	-0.17522	0.53562
0.1933	-0.10131	0.6069
0.1934	-0.03322	0.63857
0.1935	-0.03861	0.61248
0.1936	-0.07806	0.58094
0.1937	-0.1117	0.62497
0.1938	-0.12498	0.61922
0.1939	-0.20138	0.60803
0.194	-0.31639	0.55105
0.1941	-0.39569	0.60416
0.1942	-0.55638	0.68198
0.1943	-0.66059	0.69694
0.1944	-0.61907	0.62798
0.1945	-0.64855	0.5136
0.1946	-0.77478	0.4392
0.1947	-0.8055	0.36406
0.1948	-0.8217	0.32198
0.1949	-0.88314	0.35365
0.195	-0.90058	0.33447
0.1951	-0.95912	0.31492
0.1952	-1.00355	0.24813
0.1953	-1.13227	0.13231
0.1954	-1.12521	-0.13466
0.1955	-1.12812	-0.28827
0.1956	-1.18625	-0.36086
0.1957	-1.13725	-0.39204
0.1958	-1.12314	-0.42612
0.1959	-1.08328	-0.4642
0.196	-1.22445	-0.51136
0.1961	-1.26182	-0.49604
0.1962	-1.25725	-0.50215
0.1963	-1.08536	-0.4712
0.1964	-1.02557	-0.41446
0.1965	-0.9828	-0.30721
0.1966	-1.04716	-0.27917
0.1967	-1.04757	-0.20281
0.1968	-1.09283	-0.28522
0.1969	-1.03761	-0.31712
0.197	-0.97533	-0.28762
0.1971	-1.06294	-0.30318
0.1972	-1.04508	-0.31619
0.1973	-1.10362	-0.21694
0.1974	-1.09075	-0.13368
0.1975	-1.14722	0.02951
0.1976	-1.15054	0.20215
0.1977	-1.20535	0.3043
0.1978	-1.28839	0.46096
0.1979	-1.28091	0.54276
0.198	-1.30997	0.6144
0.1981	-1.26056	0.67187
0.1982	-1.25226	0.76749
0.1983	-1.2369	0.8562
0.1984	-1.33779	0.87879
0.1985	-1.36935	0.99548
0.1986	-1.38595	1.06276
0.1987	-1.42913	1.05665
0.1988	-1.39882	1.10685
0.1989	-1.31993	1.22645
0.199	-1.34443	1.25594
0.1991	-1.30623	1.34647
0.1992	-1.24602	1.30549
0.1993	-1.2481	1.38984
0.1994	-1.17627	1.51924
0.1995	-1.18499	1.57962
0.1996	-1.20243	1.61529
0.1997	-1.19703	1.63279
[truncated: 18,002 more rows]

## Sheet: Supplement 1
Figure B left					Figure B middle					Figure B right
N-N dist, nm	GLT1 vs GLT1	N-N dist, nm	Theory		N-N dist, nm	GLT1-SEP GLT1-SEP	N-N dist, nm	Theory		N-N dist, nm	GLT1DC-SEP GLT1DC-SEP	N-N dist, nm	Theory
5	0	2.5	0		5	0	2.5	0		5	0	2.5	0
10	0.02836	5	0.07951		10	0.00139	5	0.31268		10	0.000766812	5	0.36389
15	0.07062	7.5	0.20455		15	0.00408	7.5	0.58333		15	0.00251	7.5	0.68315
20	0.11654	10	0.34634		20	0.01016	10	0.7416		20	0.00488	10	0.83273
25	0.16439	12.5	0.47482		25	0.01962	12.5	0.84148		25	0.00802	12.5	0.90011
30	0.21365	15	0.57787		30	0.03186	15	0.90359		30	0.0138	15	0.93267
35	0.26208	17.5	0.66095		35	0.047	17.5	0.94043		35	0.02217	17.5	0.95111
40	0.31008	20	0.72394		40	0.06283	20	0.96157		40	0.03137	20	0.96239
45	0.35775	22.5	0.77647		45	0.08215	22.5	0.97567		45	0.03994	22.5	0.97102
50	0.40475	25	0.82413		50	0.10455	25	0.98285		50	0.0488	25	0.97632
55	0.44998	27.5	0.85824		55	0.12606	27.5	0.98711		55	0.06037	27.5	0.98103
60	0.49375	30	0.88071		60	0.14996	30	0.9895		60	0.07215	30	0.98466
65	0.53516	32.5	0.90127		65	0.17336	32.5	0.9915		65	0.08268	32.5	0.98682
70	0.57382	35	0.91767		70	0.19616	35	0.99349		70	0.0932	35	0.98907
75	0.60896	37.5	0.93134		75	0.22245	37.5	0.99429		75	0.10366	37.5	0.99143
80	0.64008	40	0.94132		80	0.24844	40	0.99536		80	0.11495	40	0.99348
85	0.66951	42.5	0.95		85	0.27502	42.5	0.99655		85	0.12771	42.5	0.99466
90	0.69745	45	0.95939		90	0.3028	45	0.99735		90	0.13963	45	0.99525
95	0.72402	47.5	0.96569		95	0.32989	47.5	0.99762		95	0.14995	47.5	0.99564
100	0.74803	50	0.9702		100	0.35627	50	0.99788		100	0.16152	50	0.99613
105	0.76959	52.5	0.97436		105	0.38376	52.5	0.99815		105	0.17274	52.5	0.99653
110	0.78886	55	0.97769		110	0.41462	55	0.99828		110	0.18278	55	0.99692
115	0.8069	57.5	0.98019		115	0.4444	57.5	0.99828		115	0.19442	57.5	0.99741
120	0.82422	60	0.98245		120	0.47088	60	0.99828		120	0.20537	60	0.9977
125	0.83991	62.5	0.98435		125	0.49767	62.5	0.99841		125	0.21603	62.5	0.9978
130	0.85404	65	0.98589		130	0.52376	65	0.99855		130	0.22698	65	0.9978
135	0.86673	67.5	0.98744		135	0.54855	67.5	0.99855		135	0.23681	67.5	0.998
140	0.87837	70	0.98875		140	0.57295	70	0.99868		140	0.24859	70	0.99819
145	0.88892	72.5	0.99065		145	0.59595	72.5	0.99895		145	0.26051	72.5	0.99819
150	0.89862	75	0.99255		150	0.61955	75	0.99921		150	0.26992	75	0.99829
155	0.90754	77.5	0.99362		155	0.64205	77.5	0.99935		155	0.27996	77.5	0.99849
160	0.91578	80	0.99457		160	0.66097	80	0.99935		160	0.29132	80	0.99888
165	0.9229	82.5	0.99528		165	0.67979	82.5	0.99935		165	0.30261	82.5	0.99917
170	0.92972	85	0.99564		170	0.69761	85	0.99935		170	0.31439	85	0.99917
175	0.93643	87.5	0.99588		175	0.71374	87.5	0.99935		175	0.32617	87.5	0.99917
180	0.94237	90	0.99623		180	0.72838	90	0.99935		180	0.33656	90	0.99917
185	0.9479	92.5	0.99683		185	0.74272	92.5	0.99935		185	0.34639	92.5	0.99917
190	0.95327	95	0.9973		190	0.75706	95	0.99935		190	0.35622	95	0.99937
195	0.95827	97.5	0.99754		195	0.7712	97.5	0.99935		195	0.36744	97.5	0.99957
200	0.96274	100	0.99766		200	0.78494	100	0.99935		200	0.37985	100	0.99966
205	0.96661	102.5	0.99778		205	0.79679	102.5	0.99935		205	0.3917	102.5	0.99976
210	0.97004	105	0.99813		210	0.80933	105	0.99935		210	0.40313	105	0.99976
215	0.9738	107.5	0.99837		215	0.82198	107.5	0.99935		215	0.41443	107.5	0.99976
220	0.97742	110	0.99837		220	0.83253	110	0.99935		220	0.42579	110	0.99976
225	0.97998	112.5	0.99837		225	0.84309	112.5	0.99935		225	0.43813	112.5	0.99976
230	0.98279	115	0.99837		230	0.85404	115	0.99935		230	0.45075	115	0.99976
235	0.9858	117.5	0.99849		235	0.8651	117.5	0.99935		235	0.46253	117.5	0.99976
240	0.98804	120	0.99873		240	0.87575	120	0.99935		240	0.47396	120	0.99976
245	0.98984	122.5	0.99897		245	0.88511	122.5	0.99935		245	0.4863	122.5	0.99976
250	0.99126	125	0.99909		250	0.89318	125	0.99935		250	0.49933	125	0.99976
255	0.9926	127.5	0.99909		255	0.90074	127.5	0.99935		255	0.51195	127.5	0.99976
260	0.99361	130	0.9992		260	0.90871	130	0.99935		260	0.52534	130	0.99976
265	0.99449	132.5	0.99932		265	0.91558	132.5	0.99935		265	0.53956	132.5	0.99976
270	0.9955	135	0.99932		270	0.92215	135	0.99935		270	0.55273	135	0.99976
275	0.99636	137.5	0.99932		275	0.92942	137.5	0.99935		275	0.56486	137.5	0.99976
280	0.99691	140	0.99932		280	0.93599	140	0.99935		280	0.57734	140	0.99976
285	0.99735	142.5	0.99932		285	0.94236	142.5	0.99935		285	0.58968	142.5	0.99976
290	0.99776	145	0.99932		290	0.94824	145	0.99935		290	0.60216	145	0.99976
295	0.99804	147.5	0.99932		295	0.95332	147.5	0.99935		295	0.61526	147.5	0.99976
300	0.99825	150	0.99932		300	0.9574	150	0.99935		300	0.62976	150	0.99986
305	0.99841	152.5	0.99932		305	0.96079	152.5	0.99935		305	0.64405	152.5	1
310	0.99857	155	0.99932		310	0.96437	155	0.99935		310	0.6566	155
315	0.99878	157.5	0.99932		315	0.96746	157.5	0.99935		315	0.66866	157.5
320	0.99894	160	0.99932		320	0.97074	160	0.99935		320	0.68037	160
325	0.99905	162.5	0.99932		325	0.97443	162.5	0.99935		325	0.69292	162.5
330	0.99914	165	0.99932		330	0.97692	165	0.99935		330	0.7063	165
335	0.99919	167.5	0.99932		335	0.97851	167.5	0.99935		335	0.71774	167.5
340	0.99924	170	0.99932		340	0.98	170	0.99935		340	0.72805	170
345	0.99937	172.5	0.99932		345	0.9813	172.5	0.99935		345	0.73921	172.5
350	0.99951	175	0.99932		350	0.98269	175	0.99935		350	0.75064	175
355	0.99954	177.5	0.99932		355	0.98429	177.5	0.99935		355	0.76137	177.5
360	0.99954	180	0.99932		360	0.98538	180	0.99935		360	0.77099	180
365	0.99958	182.5	0.99932		365	0.98608	182.5	0.99935		365	0.77922	182.5
370	0.99965	185	0.99932		370	0.98677	185	0.99935		370	0.78717	185
375	0.99967	187.5	0.99932		375	0.98747	187.5	0.99948		375	0.79658	187.5
380	0.99967	190	0.99932		380	0.98807	190	0.99961		380	0.80641	190
385	0.9997	192.5	0.99932		385	0.98857	192.5	1		385	0.81533	192.5
390	0.99974	195	0.99932		390	0.98916	195			390	0.82439	195
395	0.99979	197.5	0.99932		395	0.98976	197.5			395	0.83408	197.5
400	0.99981	200	0.99932		400	0.99066	200			400	0.84349	200
405	0.99986	202.5	0.99932		405	0.99135	202.5			405	0.852	202.5
410	0.9999	205	0.99932		410	0.99185	205			410	0.85988	205
415	0.9999	207.5	0.99944		415	0.99255	207.5			415	0.86768	207.5
420	0.9999	210	0.99956		420	0.99315	210			420	0.87598	210
425	0.9999	212.5	0.99956		425	0.99394	212.5			425	0.88532	212.5
430	0.9999	215	0.99956		430	0.99474	215			430	0.89466	215
435	0.9999	217.5	0.99956		435	0.99504	217.5			435	0.90344	217.5
440	0.9999	220	0.99956		440	0.99544	220			440	0.91223	220
445	0.9999	222.5	0.99956		445	0.99594	222.5			445	0.92122	222.5
450	0.99993	225	0.99956		450	0.99623	225			450	0.92882	225
455	0.99995	227.5	0.99956		455	0.99683	227.5			455	0.936	227.5
460	0.99995	230	0.99956		460	0.99753	230			460	0.94374	230
465	0.99995	232.5	0.99956		465	0.99783	232.5			465	0.95092	232.5
470	0.99995	235	0.99968		470	0.99823	235			470	0.95824	235
475	0.99995	237.5	0.9998		475	0.99852	237.5			475	0.9659	237.5
480	0.99995	240	0.9998		480	0.99872	240			480	0.97315	240
485	0.99995	242.5	0.9998		485	0.99902	242.5			485	0.98019	242.5
490	0.99997	245	0.9998		490	0.99912	245			490	0.98682	245
495	1	247.5	0.9998		495	0.99942	247.5			495	0.99337	247.5
500	1	250	0.9998		500	0.99972	250			500	1.00006	250
		500	1				500	1				500	1
		--	--				--	--				--	--
		--	--				--	--				--	--
		--	--				--	--				--	--
		--	--				--	--				--	--
		--	--				--	--				--	--
