# Supplementary material for: Rapid recycling of glutamate transporters on the astroglial surface
Source: eLife. 2021 Apr 16;10:e64714. doi: 10.7554/eLife.64714 (PMC8079145; doi:10.7554/eLife.64714)
Supplement: Figure 4—source data 1. [file elife-64714-fig4-data1.xlsx]

## Sheet: Figure 4
Figure 4 B				Figure 4 D left						Figure 4 D right				Figure 4 E						Figure 4 F						Figure 4 G						Figure 4 H
Time, s	F, pre	F, post		Time, s	F, pre	95CI	F, post	95CI		Time, s	F, pre	F, post		Time, s	F, pre	95CI	F, post	95CI		Time, s	F, pre	95CI	F, post	95CI		Time, s	F, pre	95CI	F, post	95CI		Time, s	F, pre	95CI	F, post	95CI
-5.9328	0.90602	0.91721		-6.08112	0.98996	0.013	0.94572	0.01889		-6.08112	0.98996	0.94572		-6.08112	0.96718	0.02932	0.99814	0.03672		-6.08112	0.98049	0.02581	0.96531	0.02832		-6.08112	0.9701	0.00882	0.98373	0.01811		-6.08112	0.96807	0.02808	0.96675	0.02984
-5.78448	0.98893	0.96217		-5.9328	1.00175	0.01569	1.00582	0.02109		-5.9328	1.00175	1.00582		-5.9328	0.98202	0.02742	0.99839	0.03587		-5.9328	0.97131	0.01856	0.98255	0.02608		-5.9328	0.97894	0.014	1.0089	0.01548		-5.9328	1.01897	0.04108	0.98341	0.02306
-5.63616	1.12954	1.03207		-5.78448	0.98937	0.01546	0.99756	0.01896		-5.78448	0.98937	0.99756		-5.78448	0.99648	0.02259	1.01157	0.04716		-5.78448	0.97445	0.0227	1.00594	0.03395		-5.78448	0.98592	0.01487	1.00927	0.01512		-5.78448	1.01774	0.02935	0.98723	0.01874
-5.48784	1.06023	1.11864		-5.63616	0.99371	0.01591	0.98055	0.0178		-5.63616	0.99371	0.98055		-5.63616	0.97073	0.03067	0.96227	0.03259		-5.63616	0.98859	0.02476	0.96034	0.03257		-5.63616	0.99924	0.00901	1.02454	0.01818		-5.63616	1.03019	0.02869	1.01487	0.02197
-5.33952	0.98998	1.08824		-5.48784	0.99527	0.01486	1.00244	0.01811		-5.48784	0.99527	1.00244		-5.48784	1.00693	0.02619	1.0147	0.02871		-5.48784	1.0015	0.02916	0.99131	0.03661		-5.48784	1.0149	0.00919	0.9931	0.01166		-5.48784	0.99492	0.04409	1.00611	0.01784
-5.1912	0.93278	0.9424		-5.33952	0.98713	0.01118	1.02078	0.01777		-5.33952	0.98713	1.02078		-5.33952	1.00621	0.02818	1.01553	0.03414		-5.33952	1.01812	0.02518	0.99211	0.02361		-5.33952	0.96878	0.01128	0.97021	0.01592		-5.33952	0.99857	0.02881	1.01291	0.02902
-5.04288	1.02596	1.07274		-5.1912	0.99858	0.01413	0.99092	0.02297		-5.1912	0.99858	0.99092		-5.1912	0.97487	0.02911	0.99155	0.04423		-5.1912	0.98132	0.02644	0.98177	0.03346		-5.1912	1.00637	0.00899	0.97158	0.02125		-5.1912	1.01526	0.02862	0.98656	0.02575
-4.89456	0.92389	0.94054		-5.04288	1.00108	0.01491	0.99112	0.01945		-5.04288	1.00108	0.99112		-5.04288	1.01913	0.02242	0.97075	0.03391		-5.04288	1.00056	0.02888	1.00919	0.03089		-5.04288	1.00924	0.01063	1.00518	0.01082		-5.04288	0.98113	0.04302	0.99188	0.02285
-4.74624	0.91351	0.92917		-4.89456	1.01012	0.01672	0.99996	0.02142		-4.89456	1.01012	0.99996		-4.89456	1.01402	0.03267	1.02294	0.03624		-4.89456	1.01961	0.02464	1.00264	0.02605		-4.89456	1.00024	0.00932	0.99365	0.01321		-4.89456	1.00743	0.022	1.002	0.02089
-4.59792	1.03996	0.94958		-4.74624	0.9947	0.01477	0.96869	0.01807		-4.74624	0.9947	0.96869		-4.74624	1.00922	0.03047	0.99031	0.05138		-4.74624	0.99402	0.02861	0.98329	0.02844		-4.74624	1.01091	0.0154	1.02453	0.01573		-4.74624	0.98357	0.01783	0.98646	0.01934
-4.4496	1.05743	1.02167		-4.59792	0.99719	0.01326	0.99434	0.0187		-4.59792	0.99719	0.99434		-4.59792	0.99848	0.03007	1.00512	0.03664		-4.59792	1.00944	0.02798	1.00318	0.02416		-4.59792	1.01622	0.00877	1.02502	0.01804		-4.59792	1.00625	0.03716	0.9774	0.02119
-4.30128	1.06071	0.94851		-4.4496	0.995	0.01499	1.00225	0.0216		-4.4496	0.995	1.00225		-4.4496	1.00206	0.02912	0.99252	0.03357		-4.4496	1.0036	0.02577	1.00564	0.02238		-4.4496	1.00481	0.01098	1.00249	0.0175		-4.4496	1.02649	0.01775	0.98804	0.01214
-4.15296	0.92008	0.96161		-4.30128	0.99564	0.01353	1.01882	0.01852		-4.30128	0.99564	1.01882		-4.30128	0.99376	0.03312	1.02798	0.04917		-4.30128	0.99148	0.02343	1.00566	0.02599		-4.30128	1.01531	0.00933	1.01996	0.01084		-4.30128	1.01035	0.03063	0.99073	0.02409
-4.00464	1.04454	0.98907		-4.15296	0.99892	0.01392	0.98472	0.02341		-4.15296	0.99892	0.98472		-4.15296	1.02923	0.01669	1.00678	0.04833		-4.15296	1.02658	0.02399	0.98565	0.02446		-4.15296	1.00745	0.01397	1.00228	0.01155		-4.15296	0.9931	0.016	0.96504	0.01432
-3.85632	1.01474	1.00251		-4.00464	1.00701	0.01265	0.9968	0.02262		-4.00464	1.00701	0.9968		-4.00464	1.01422	0.03114	1.05296	0.03899		-4.00464	1.01055	0.02058	1.01301	0.04057		-4.00464	0.99487	0.01258	0.99644	0.0146		-4.00464	1.00569	0.02763	1.00274	0.0264
-3.708	0.9545	1.01634		-3.85632	1.00101	0.01357	1.02368	0.0154		-3.85632	1.00101	1.02368		-3.85632	1.00642	0.03195	0.96636	0.0539		-3.85632	1.01814	0.02486	1.00503	0.02804		-3.85632	1.0085	0.01288	0.977	0.01725		-3.85632	0.98356	0.02516	1.0215	0.0246
-3.55968	0.97691	0.9687		-3.708	0.99046	0.01483	1.03138	0.0215		-3.708	0.99046	1.03138		-3.708	0.99068	0.02063	1.02952	0.02547		-3.708	0.984	0.02765	0.97254	0.03185		-3.708	0.98888	0.01634	1.00728	0.00984		-3.708	0.99891	0.03521	1.00094	0.00989
-3.41136	0.99455	1.04156		-3.55968	1.00836	0.01551	0.98568	0.01777		-3.55968	1.00836	0.98568		-3.55968	0.98883	0.02935	0.98436	0.03177		-3.55968	1.02974	0.02416	0.99145	0.02847		-3.55968	0.98729	0.00988	0.99186	0.01441		-3.55968	0.99725	0.02574	1.0261	0.02305
-3.26304	0.91768	0.98996		-3.41136	0.99867	0.0134	1.01225	0.01809		-3.41136	0.99867	1.01225		-3.41136	0.99787	0.02709	1.02117	0.03724		-3.41136	1.01102	0.02253	1.02421	0.03041		-3.41136	1.01191	0.00873	1.00508	0.01226		-3.41136	1.01401	0.01929	0.98222	0.01664
-3.11472	1.08293	1.01847		-3.26304	0.99734	0.0121	1.00331	0.02098		-3.26304	0.99734	1.00331		-3.26304	0.99546	0.03555	1.02522	0.02801		-3.26304	0.99223	0.02534	0.97889	0.02467		-3.26304	1.02077	0.01008	1.00256	0.01439		-3.26304	0.99797	0.0331	1.00593	0.026
-2.9664	1.05761	0.93837		-3.11472	0.99969	0.01611	1.01933	0.01811		-3.11472	0.99969	1.01933		-3.11472	0.99845	0.03432	1.03344	0.03848		-3.11472	1.00478	0.02597	1.01582	0.02631		-3.11472	0.99296	0.01046	0.98648	0.01833		-3.11472	0.97696	0.02855	0.99511	0.02565
-2.81808	1.00802	0.94368		-2.9664	0.98929	0.015	1.01592	0.02262		-2.9664	0.98929	1.01592		-2.9664	1.0201	0.03829	0.99909	0.03035		-2.9664	1.00746	0.02991	0.99111	0.02616		-2.9664	1.00602	0.00831	0.98265	0.01489		-2.9664	1.00334	0.02463	0.97944	0.01616
-2.66976	1.03188	1.08474		-2.81808	1.00762	0.01548	1.00357	0.01862		-2.81808	1.00762	1.00357		-2.81808	0.99175	0.03178	0.99293	0.0369		-2.81808	1.02102	0.02382	0.98749	0.0249		-2.81808	1.02105	0.01231	1.00601	0.01095		-2.81808	0.97993	0.02475	0.99581	0.01948
-2.52144	1.09198	1.16915		-2.66976	1.01777	0.01401	0.98832	0.02008		-2.66976	1.01777	0.98832		-2.66976	0.99894	0.03149	0.97509	0.02468		-2.66976	1.02001	0.02495	1.0095	0.02877		-2.66976	1.01519	0.01179	0.99106	0.01342		-2.66976	1.00669	0.03677	1.0176	0.01612
-2.37312	0.98806	0.95409		-2.52144	1.01319	0.0118	1.03854	0.01952		-2.52144	1.01319	1.03854		-2.52144	1.00854	0.04129	0.97873	0.03016		-2.52144	1.03164	0.02652	0.97667	0.03543		-2.52144	0.99236	0.01116	1.01659	0.01489		-2.52144	0.99657	0.03612	1.01195	0.02845
-2.2248	1.03662	1.04624		-2.37312	1.00476	0.01461	0.98172	0.02125		-2.37312	1.00476	0.98172		-2.37312	1.00403	0.03415	0.97049	0.03505		-2.37312	0.99767	0.01945	0.98765	0.03458		-2.37312	0.99851	0.01032	0.98518	0.016		-2.37312	1.02623	0.02901	1.01561	0.01826
-2.07648	1.06179	1.09367		-2.2248	0.99939	0.01407	1.01787	0.01869		-2.2248	0.99939	1.01787		-2.2248	1.03016	0.0366	0.99433	0.03186		-2.2248	0.98516	0.02563	1.03105	0.02608		-2.2248	0.99822	0.01172	0.99975	0.01259		-2.2248	1.01908	0.03265	1.01389	0.01826
-1.92816	1.0905	1.09978		-2.07648	1.00875	0.01175	0.98895	0.02015		-2.07648	1.00875	0.98895		-2.07648	0.99886	0.03498	0.99796	0.03224		-2.07648	1.01629	0.01918	1.01562	0.02698		-2.07648	0.98924	0.0087	1.0007	0.01574		-2.07648	1.01239	0.01547	1.00368	0.01637
-1.77984	1.04362	0.99015		-1.92816	1.00409	0.01753	0.98109	0.01767		-1.92816	1.00409	0.98109		-1.92816	1.02875	0.0279	0.9888	0.02884		-1.92816	0.9893	0.01919	0.9982	0.0275		-1.92816	1.00497	0.00785	1.00188	0.01283		-1.92816	0.97336	0.01969	1.00681	0.0269
-1.63152	1.01708	1.02087		-1.77984	1.00012	0.01426	1.00297	0.02133		-1.77984	1.00012	1.00297		-1.77984	0.99692	0.03628	0.98429	0.03386		-1.77984	0.99171	0.02235	1.00768	0.0202		-1.77984	1.01935	0.01099	1.0163	0.02103		-1.77984	1.01694	0.03931	1.0106	0.02141
-1.4832	0.93194	0.89022		-1.63152	1.00724	0.01301	0.97833	0.01967		-1.63152	1.00724	0.97833		-1.63152	0.99173	0.02839	0.99576	0.03619		-1.63152	0.98436	0.02882	1.00022	0.02564		-1.63152	0.99265	0.01341	0.99654	0.01686		-1.63152	0.98632	0.02528	1.02335	0.02707
-1.33488	1.08687	0.94369		-1.4832	0.99512	0.01553	1.00905	0.01941		-1.4832	0.99512	1.00905		-1.4832	1.00493	0.03072	0.99261	0.03462		-1.4832	0.98115	0.02964	0.99249	0.02504		-1.4832	1.0024	0.00922	1.00202	0.01259		-1.4832	0.99145	0.02318	0.98258	0.01452
-1.18656	0.95864	0.89069		-1.33488	1.01066	0.01754	1.0164	0.02097		-1.33488	1.01066	1.0164		-1.33488	1.01036	0.02865	0.98905	0.03994		-1.33488	0.9951	0.02659	1.00573	0.03165		-1.33488	1.00564	0.01061	0.96983	0.01418		-1.33488	0.98846	0.03279	0.98972	0.02528
-1.03824	0.93198	0.95323		-1.18656	1.00468	0.01433	0.97642	0.01656		-1.18656	1.00468	0.97642		-1.18656	1.0229	0.02636	0.97796	0.03068		-1.18656	0.99377	0.01967	0.98813	0.02514		-1.18656	0.99834	0.00908	0.99494	0.01699		-1.18656	1.01844	0.03074	1.00273	0.03324
-0.88992	0.93092	1.00022		-1.03824	1.00286	0.01446	1.0032	0.01786		-1.03824	1.00286	1.0032		-1.03824	0.97313	0.03711	1.01299	0.03462		-1.03824	0.982	0.02499	1.03126	0.03079		-1.03824	0.9835	0.01292	1.02928	0.01218		-1.03824	1.00247	0.0188	0.99915	0.02196
-0.7416	0.91832	0.97776		-0.88992	1.00525	0.01769	0.99789	0.01628		-0.88992	1.00525	0.99789		-0.88992	1.00764	0.02836	0.97849	0.03842		-0.88992	1.0183	0.02514	1.0187	0.02952		-0.88992	1.00454	0.01113	0.98431	0.01484		-0.88992	0.9965	0.02492	1.00815	0.02377
-0.59328	0.9239	0.96798		-0.7416	0.99984	0.01305	1.00242	0.02437		-0.7416	0.99984	1.00242		-0.7416	0.97457	0.03385	1.00146	0.03477		-0.7416	0.99184	0.01911	1.00842	0.03238		-0.7416	0.98538	0.00935	0.99329	0.01876		-0.7416	0.98187	0.03225	1.01054	0.02884
-0.44496	1.01696	1.07229		-0.59328	1.00026	0.01495	0.98407	0.01955		-0.59328	1.00026	0.98407		-0.59328	0.98534	0.03842	0.99942	0.03722		-0.59328	0.97807	0.02423	1.00078	0.03143		-0.59328	0.9912	0.01459	1.00745	0.01707		-0.59328	0.97155	0.01865	1.03538	0.02345
-0.29664	0.96364	1.04486		-0.44496	0.99093	0.01469	1.02456	0.01461		-0.44496	0.99093	1.02456		-0.44496	0.99678	0.03488	1.01679	0.03513		-0.44496	0.99617	0.02686	1.02709	0.02891		-0.44496	0.99666	0.0181	1.01291	0.0168		-0.44496	0.99706	0.03089	1.0014	0.02537
-0.14832	0.97478	1.00716		-0.29664	0.98719	0.01494	1.01257	0.02057		-0.29664	0.98719	1.01257		-0.29664	0.99236	0.0393	1.0322	0.04526		-0.29664	1.00746	0.02609	1.04668	0.02649		-0.29664	1.00117	0.01131	1.00817	0.0184		-0.29664	1.00495	0.02322	0.99536	0.02077
0	0.90203	0.72593		--		--	--	--		-0.14832		--		--	0.87426	0.08346	0.5833	0.48713		--	--	--	--	--		--	0.87854	0.02846	0.83747	0.02437		-0.14832	0.90141	0.04911	0.9014	0.04045
0.14832	0	0		0	0	0	0	0		0	0	0		0	0	0	0	0		0	0	0	0	0		0	0	0	0	0		0	0	0	0	0
0.29664	0.04537	-0.0174		0.14832	0.07129	0.01358	0.07735	0.02056		0.14832	0.07129	0.07735		0.14832	0.06607	0.02826	0.08292	0.02645		0.14832	0.09093	0.02174	0.08944	0.03846		0.14832	0.04155	0.00913	0.04912	0.0184		0.14832	0.07079	0.0202	0.03046	0.0271
0.44496	0.11159	0.01896		0.29664	0.13468	0.01614	0.14538	0.02337		0.29664	0.13468	0.14538		0.29664	0.14275	0.02543	0.14433	0.03593		0.29664	0.15125	0.02669	0.16822	0.03896		0.29664	0.09411	0.00984	0.08308	0.01052		0.29664	0.16098	0.02201	0.05573	0.02139
0.59328	0.08985	0.08831		0.44496	0.18232	0.01919	0.2092	0.0263		0.44496	0.18232	0.2092		0.44496	0.17712	0.03146	0.23928	0.0334		0.44496	0.20548	0.03307	0.2243	0.03339		0.44496	0.13225	0.01601	0.1219	0.01861		0.44496	0.22413	0.02877	0.08171	0.0281
0.7416	0.19836	0.11347		0.59328	0.22611	0.02237	0.25791	0.02761		0.59328	0.22611	0.25791		0.59328	0.24016	0.04071	0.24863	0.04084		0.59328	0.23925	0.03362	0.26376	0.03443		0.59328	0.16332	0.01653	0.16679	0.01907		0.59328	0.25482	0.03141	0.09109	0.02638
0.88992	0.19148	0.1507		0.7416	0.26242	0.02394	0.26293	0.02933		0.7416	0.26242	0.26293		0.7416	0.28316	0.03643	0.28301	0.05027		0.7416	0.31055	0.03595	0.31146	0.03926		0.7416	0.16776	0.01628	0.19027	0.0229		0.7416	0.27566	0.0433	0.11857	0.02704
1.03824	0.25799	0.25473		0.88992	0.30202	0.02782	0.34945	0.02934		0.88992	0.30202	0.34945		0.88992	0.31476	0.04357	0.33448	0.04784		0.88992	0.30924	0.03555	0.33036	0.03475		0.88992	0.20958	0.01914	0.22694	0.0208		0.88992	0.29964	0.03563	0.11043	0.02897
1.18656	0.23967	0.23586		1.03824	0.31362	0.02751	0.36758	0.03421		1.03824	0.31362	0.36758		1.03824	0.30136	0.04262	0.35771	0.04922		1.03824	0.34953	0.03316	0.36932	0.04512		1.03824	0.23959	0.01853	0.23063	0.02022		1.03824	0.33484	0.04015	0.12864	0.01822
1.33488	0.29109	0.26317		1.18656	0.33581	0.02985	0.39004	0.03347		1.18656	0.33581	0.39004		1.18656	0.36687	0.04567	0.39132	0.06196		1.18656	0.38851	0.04359	0.39787	0.05099		1.18656	0.26336	0.02788	0.23908	0.0161		1.18656	0.38614	0.04205	0.12537	0.02396
1.4832	0.31035	0.22368		1.33488	0.34558	0.02987	0.39479	0.03581		1.33488	0.34558	0.39479		1.33488	0.37789	0.0447	0.39234	0.06233		1.33488	0.39694	0.03335	0.38207	0.05038		1.33488	0.28472	0.03046	0.25768	0.02467		1.33488	0.41574	0.03874	0.13377	0.02238
1.63152	0.27894	0.25074		1.4832	0.37624	0.02922	0.4167	0.03596		1.4832	0.37624	0.4167		1.4832	0.41668	0.06147	0.42741	0.06048		1.4832	0.4197	0.02998	0.42212	0.05065		1.4832	0.29403	0.02626	0.27152	0.02433		1.4832	0.38029	0.04273	0.15178	0.01946
1.77984	0.35526	0.4125		1.63152	0.37982	0.03078	0.45273	0.03736		1.63152	0.37982	0.45273		1.63152	0.43945	0.05038	0.43367	0.05153		1.63152	0.41854	0.0346	0.42537	0.04171		1.63152	0.2976	0.02587	0.29411	0.02204		1.63152	0.42154	0.04589	0.16335	0.02849
1.92816	0.28077	0.2668		1.77984	0.40896	0.03319	0.43998	0.03552		1.77984	0.40896	0.43998		1.77984	0.42591	0.04482	0.47105	0.06039		1.77984	0.45214	0.03928	0.46359	0.05173		1.77984	0.32924	0.03195	0.30371	0.02641		1.77984	0.43204	0.0403	0.17433	0.03295
2.07648	0.40625	0.32897		1.92816	0.41984	0.0292	0.46946	0.04034		1.92816	0.41984	0.46946		1.92816	0.47482	0.07064	0.48049	0.06973		1.92816	0.48463	0.04213	0.46574	0.05042		1.92816	0.32591	0.02637	0.33076	0.02145		1.92816	0.44694	0.05779	0.15612	0.01972
2.2248	0.2856	0.38914		2.07648	0.43175	0.03106	0.50446	0.03928		2.07648	0.43175	0.50446		2.07648	0.48071	0.05014	0.47752	0.06347		2.07648	0.4824	0.04618	0.46017	0.05337		2.07648	0.33677	0.02961	0.3298	0.02036		2.07648	0.44942	0.04465	0.1837	0.02221
2.37312	0.29869	0.37375		2.2248	0.45684	0.03249	0.5018	0.03553		2.2248	0.45684	0.5018		2.2248	0.48492	0.0519	0.47441	0.05251		2.2248	0.47649	0.03884	0.49671	0.05306		2.2248	0.36158	0.03394	0.34021	0.02638		2.2248	0.50227	0.03284	0.17831	0.02775
2.52144	0.41477	0.43661		2.37312	0.45132	0.03297	0.52552	0.03929		2.37312	0.45132	0.52552		2.37312	0.46042	0.04447	0.50398	0.05963		2.37312	0.5117	0.04903	0.4995	0.05735		2.37312	0.36818	0.03382	0.35623	0.02678		2.37312	0.48127	0.0373	0.16833	0.02413
2.66976	0.27433	0.24542		2.52144	0.45481	0.0316	0.54223	0.03875		2.52144	0.45481	0.54223		2.52144	0.49167	0.05899	0.5169	0.05825		2.52144	0.49831	0.0423	0.51168	0.06119		2.52144	0.37859	0.03542	0.35212	0.02367		2.52144	0.49373	0.03185	0.17987	0.02032
2.81808	0.34521	0.38398		2.66976	0.46366	0.03328	0.53065	0.04207		2.66976	0.46366	0.53065		2.66976	0.50218	0.04734	0.52137	0.05508		2.66976	0.50842	0.04463	0.50345	0.05845		2.66976	0.38744	0.03355	0.37448	0.0242		2.66976	0.49709	0.05156	0.18918	0.0338
2.9664	0.45716	0.41832		2.81808	0.47632	0.03585	0.54593	0.03761		2.81808	0.47632	0.54593		2.81808	0.50681	0.04445	0.53229	0.05762		2.81808	0.53795	0.04317	0.53332	0.06474		2.81808	0.40115	0.03672	0.39009	0.02449		2.81808	0.5348	0.04978	0.17792	0.03037
3.11472	0.41263	0.33053		2.9664	0.47802	0.03596	0.56006	0.04386		2.9664	0.47802	0.56006		2.9664	0.52032	0.05554	0.54697	0.06309		2.9664	0.53062	0.04378	0.52766	0.05334		2.9664	0.40145	0.03388	0.36785	0.0202		2.9664	0.50142	0.04033	0.18461	0.02863
3.26304	0.39599	0.48529		3.11472	0.50375	0.03653	0.57202	0.04019		3.11472	0.50375	0.57202		3.11472	0.53658	0.04936	0.54075	0.05781		3.11472	0.52825	0.04004	0.56532	0.05089		3.11472	0.3993	0.03616	0.42432	0.03096		3.11472	0.51647	0.06247	0.1975	0.03216
3.41136	0.35758	0.45361		3.26304	0.49571	0.03397	0.59204	0.04517		3.26304	0.49571	0.59204		3.26304	0.54171	0.05567	0.58821	0.06146		3.26304	0.54715	0.04201	0.54638	0.04864		3.26304	0.41242	0.03517	0.39811	0.02804		3.26304	0.54653	0.06926	0.18993	0.02259
3.55968	0.44342	0.33224		3.41136	0.52181	0.03519	0.61237	0.03936		3.41136	0.52181	0.61237		3.41136	0.56676	0.05587	0.55451	0.05786		3.41136	0.55064	0.0429	0.55493	0.05324		3.41136	0.43114	0.03403	0.41219	0.02809		3.41136	0.55411	0.05541	0.1865	0.03175
3.708	0.43561	0.39116		3.55968	0.52202	0.03448	0.60201	0.03899		3.55968	0.52202	0.60201		3.55968	0.54748	0.05643	0.58694	0.06443		3.55968	0.54883	0.0425	0.56426	0.06492		3.55968	0.41013	0.03232	0.41013	0.02765		3.55968	0.54007	0.06076	0.19676	0.02067
3.85632	0.36986	0.44565		3.708	0.5125	0.03649	0.60222	0.04492		3.708	0.5125	0.60222		3.708	0.56526	0.05227	0.58578	0.06609		3.708	0.59068	0.05426	0.56936	0.058		3.708	0.42725	0.03493	0.42218	0.03007		3.708	0.52627	0.05739	0.20471	0.02171
4.00464	0.4602	0.51507		3.85632	0.52994	0.03517	0.60662	0.04103		3.85632	0.52994	0.60662		3.85632	0.55501	0.04922	0.6035	0.06489		3.85632	0.56281	0.04273	0.57981	0.06282		3.85632	0.43102	0.03388	0.41952	0.03395		3.85632	0.58188	0.0506	0.20681	0.02943
4.15296	0.51758	0.50903		4.00464	0.53584	0.03709	0.63234	0.0434		4.00464	0.53584	0.63234		4.00464	0.54799	0.05369	0.56428	0.05225		4.00464	0.58746	0.04495	0.56584	0.05696		4.00464	0.45417	0.03626	0.44951	0.03009		4.00464	0.56504	0.04986	0.18871	0.03067
4.30128	0.41801	0.58179		4.15296	0.52673	0.03575	0.6168	0.04555		4.15296	0.52673	0.6168		4.15296	0.59012	0.05562	0.54437	0.05565		4.15296	0.57034	0.05468	0.60773	0.06171		4.15296	0.47581	0.04222	0.45908	0.02884		4.15296	0.54663	0.05455	0.20974	0.02365
4.4496	0.45309	0.43265		4.30128	0.5503	0.03689	0.61928	0.03948		4.30128	0.5503	0.61928		4.30128	0.57881	0.05641	0.58363	0.06047		4.30128	0.58722	0.04482	0.57751	0.05502		4.30128	0.45787	0.03834	0.43568	0.0237		4.30128	0.5639	0.06169	0.21011	0.02609
4.59792	0.47906	0.56766		4.4496	0.53926	0.03629	0.65977	0.04075		4.4496	0.53926	0.65977		4.4496	0.59642	0.05494	0.60913	0.06219		4.4496	0.58638	0.04599	0.59155	0.05495		4.4496	0.48323	0.04113	0.45249	0.02617		4.4496	0.56774	0.05994	0.20959	0.02485
4.74624	0.49364	0.59429		4.59792	0.56006	0.03474	0.61422	0.04111		4.59792	0.56006	0.61422		4.59792	0.62512	0.05168	0.5919	0.06374		4.59792	0.60022	0.05167	0.57844	0.06613		4.59792	0.46854	0.03673	0.46999	0.03222		4.59792	0.58817	0.05913	0.20821	0.03423
4.89456	0.43917	0.54723		4.74624	0.55147	0.03632	0.68737	0.04432		4.74624	0.55147	0.68737		4.74624	0.59314	0.05317	0.59926	0.07552		4.74624	0.59601	0.04777	0.6098	0.05961		4.74624	0.47707	0.03873	0.43898	0.02643		4.74624	0.60001	0.04902	0.20714	0.03072
5.04288	0.44903	0.54304		4.89456	0.5474	0.03537	0.67889	0.04273		4.89456	0.5474	0.67889		4.89456	0.58603	0.03424	0.62275	0.05937		4.89456	0.60913	0.05715	0.61214	0.05943		4.89456	0.47559	0.03613	0.45236	0.03243		4.89456	0.58233	0.04513	0.18518	0.04014
5.1912	0.55757	0.42612		5.04288	0.56243	0.03685	0.65226	0.03748		5.04288	0.56243	0.65226		5.04288	0.60545	0.0676	0.61581	0.06849		5.04288	0.59773	0.04463	0.58244	0.05833		5.04288	0.44515	0.03594	0.46958	0.0264		5.04288	0.59209	0.04947	0.21113	0.02882
5.33952	0.47563	0.61447		5.1912	0.56129	0.03572	0.6838	0.03863		5.1912	0.56129	0.6838		5.1912	0.60036	0.06453	0.6322	0.06174		5.1912	0.62602	0.04263	0.61356	0.0651		5.1912	0.49222	0.03779	0.48935	0.02679		5.1912	0.57065	0.05125	0.22895	0.02525
5.48784	0.51194	0.55564		5.33952	0.56492	0.03741	0.6904	0.03903		5.33952	0.56492	0.6904		5.33952	0.60735	0.06101	0.60782	0.05817		5.33952	0.6014	0.05071	0.61278	0.0628		5.33952	0.50023	0.03803	0.46022	0.02585		5.33952	0.60245	0.06504	0.23438	0.04227
5.63616	0.54765	0.44894		5.48784	0.57673	0.0409	0.68221	0.03841		5.48784	0.57673	0.68221		5.48784	0.61911	0.04179	0.61304	0.06964		5.48784	0.6353	0.04669	0.5974	0.05807		5.48784	0.48515	0.03739	0.49255	0.0254		5.48784	0.60756	0.05599	0.20295	0.03489
5.78448	0.49782	0.51753		5.63616	0.57875	0.03658	0.68037	0.04138		5.63616	0.57875	0.68037		5.63616	0.60035	0.06011	0.61984	0.06852		5.63616	0.6198	0.04939	0.61753	0.05892		5.63616	0.49281	0.04035	0.47835	0.03273		5.63616	0.60123	0.05317	0.21321	0.03261
5.9328	0.45067	0.47027		5.78448	0.57309	0.04013	0.70157	0.03821		5.78448	0.57309	0.70157		5.78448	0.61537	0.05831	0.64729	0.06757		5.78448	0.60452	0.04277	0.60212	0.05792		5.78448	0.50499	0.0404	0.51314	0.02934		5.78448	0.58947	0.05123	0.22206	0.02284
6.08112	0.56314	0.51509		5.9328	0.59098	0.03693	0.69647	0.03859		5.9328	0.59098	0.69647		5.9328	0.62376	0.06258	0.62486	0.05991		5.9328	0.63933	0.04999	0.60788	0.05033		5.9328	0.51456	0.03979	0.48093	0.03295		5.9328	0.61432	0.05	0.22279	0.03553
6.22944	0.46704	0.58364		6.08112	0.58349	0.0388	0.68913	0.04268		6.08112	0.58349	0.68913		6.08112	0.62893	0.05536	0.63913	0.06599		6.08112	0.64898	0.0446	0.63841	0.0638		6.08112	0.5054	0.0361	0.47651	0.03487		6.08112	0.60006	0.05986	0.24433	0.04071
6.37776	0.56159	0.65493		6.22944	0.59578	0.03941	0.6935	0.04431		6.22944	0.59578	0.6935		6.22944	0.61859	0.0524	0.6429	0.06506		6.22944	0.62109	0.04424	0.6179	0.0561		6.22944	0.52162	0.03983	0.4708	0.02971		6.22944	0.61426	0.05455	0.22694	0.03569
6.52608	0.52333	0.57586		6.37776	0.60145	0.04023	0.72485	0.04361		6.37776	0.60145	0.72485		6.37776	0.61111	0.06872	0.64888	0.05807		6.37776	0.66401	0.05052	0.62697	0.06537		6.37776	0.52441	0.03951	0.50514	0.03194		6.37776	0.60801	0.05435	0.23023	0.0335
6.6744	0.49763	0.58584		6.52608	0.59901	0.04013	0.72085	0.0378		6.52608	0.59901	0.72085		6.52608	0.61232	0.05139	0.64294	0.06108		6.52608	0.63257	0.05045	0.66952	0.06369		6.52608	0.50948	0.03769	0.49127	0.03495		6.52608	0.61831	0.05106	0.23076	0.03903
6.82272	0.45689	0.5192		6.6744	0.60021	0.03706	0.70431	0.04382		6.6744	0.60021	0.70431		6.6744	0.60063	0.04291	0.62821	0.06664		6.6744	0.64224	0.04394	0.6403	0.06774		6.6744	0.52021	0.03722	0.49572	0.02298		6.6744	0.61342	0.05835	0.22534	0.03576
6.97104	0.56737	0.46991		6.82272	0.60582	0.03896	0.70838	0.04193		6.82272	0.60582	0.70838		6.82272	0.64849	0.05147	0.66643	0.06053		6.82272	0.64003	0.05406	0.65592	0.05749		6.82272	0.54796	0.04244	0.49761	0.0297		6.82272	0.62096	0.05413	0.23647	0.03611
7.11936	0.54247	0.62665		6.97104	0.59438	0.03989	0.72571	0.04099		6.97104	0.59438	0.72571		6.97104	0.62811	0.04309	0.66513	0.06155		6.97104	0.65245	0.04989	0.65476	0.06148		6.97104	0.53665	0.04087	0.51151	0.02884		6.97104	0.62174	0.05794	0.24958	0.03918
7.26768	0.51628	0.55512		7.11936	0.61232	0.041	0.7209	0.04233		7.11936	0.61232	0.7209		7.11936	0.64646	0.05093	0.64556	0.06505		7.11936	0.65101	0.04192	0.64447	0.05941		7.11936	0.54217	0.04115	0.50776	0.03186		7.11936	0.63784	0.05395	0.22789	0.0432
7.416	0.47827	0.63397		7.26768	0.60874	0.03903	0.7133	0.04044		7.26768	0.60874	0.7133		7.26768	0.62906	0.05861	0.67158	0.06802		7.26768	0.66251	0.0519	0.67012	0.05939		7.26768	0.54357	0.03923	0.49309	0.02763		7.26768	0.62862	0.05785	0.25502	0.03762
7.56432	0.53868	0.60577		7.416	0.60232	0.03967	0.73788	0.04423		7.416	0.60232	0.73788		7.416	0.62314	0.05415	0.64588	0.06494		7.416	0.65816	0.04363	0.66421	0.0631		7.416	0.55778	0.04285	0.51012	0.03274		7.416	0.60135	0.05818	0.22904	0.04364
7.71264	0.5288	0.56498		7.56432	0.60747	0.0401	0.68478	0.04011		7.56432	0.60747	0.68478		7.56432	0.64059	0.05036	0.63744	0.05883		7.56432	0.63676	0.05038	0.6662	0.06559		7.56432	0.53732	0.04134	0.50353	0.03522		7.56432	0.63966	0.06205	0.22233	0.03149
7.86096	0.53666	0.56133		7.71264	0.61132	0.03806	0.70361	0.04007		7.71264	0.61132	0.70361		7.71264	0.64661	0.05357	0.65175	0.06399		7.71264	0.64247	0.05373	0.6266	0.05882		7.71264	0.53157	0.03756	0.53443	0.03253		7.71264	0.64339	0.06343	0.24525	0.02937
8.00928	0.61594	0.71891		7.86096	0.62075	0.03877	0.73913	0.04037		7.86096	0.62075	0.73913		7.86096	0.64465	0.04622	0.70129	0.06544		7.86096	0.65754	0.04748	0.63957	0.06929		7.86096	0.54409	0.04142	0.52114	0.02928		7.86096	0.65504	0.05924	0.25409	0.03603
8.1576	0.60023	0.55508		8.00928	0.60874	0.04253	0.73243	0.0432		8.00928	0.60874	0.73243		8.00928	0.67814	0.05641	0.68821	0.07085		8.00928	0.6729	0.05634	0.65826	0.06516		8.00928	0.54351	0.04382	0.53728	0.02852		8.00928	0.62857	0.06462	0.23087	0.03121
8.30592	0.51659	0.62725		8.1576	0.61985	0.04188	0.74071	0.04243		8.1576	0.61985	0.74071		8.1576	0.67649	0.06602	0.69462	0.06159		8.1576	0.66749	0.04752	0.64133	0.0591		8.1576	0.55503	0.04132	0.546	0.02807		8.1576	0.61122	0.04992	0.25046	0.04398
8.45424	0.54895	0.57981		8.30592	0.61913	0.04126	0.73687	0.04256		8.30592	0.61913	0.73687		8.30592	0.65651	0.06011	0.63738	0.06385		8.30592	0.65414	0.0496	0.66771	0.07042		8.30592	0.56382	0.04259	0.54085	0.02746		8.30592	0.64398	0.05566	0.25895	0.05007
8.60256	0.51923	0.65628		8.45424	0.6277	0.0421	0.7602	0.04118		8.45424	0.6277	0.7602		8.45424	0.65556	0.06085	0.68319	0.05523		8.45424	0.67264	0.0514	0.68445	0.06656		8.45424	0.55676	0.04197	0.50874	0.02772		8.45424	0.619	0.06503	0.26256	0.03832
8.75088	0.54441	0.73563		8.60256	0.63781	0.04071	0.74011	0.04102		8.60256	0.63781	0.74011		8.60256	0.69955	0.06988	0.67491	0.061		8.60256	0.67871	0.04802	0.67245	0.0712		8.60256	0.56254	0.03888	0.53124	0.03324		8.60256	0.64291	0.05458	0.24096	0.0372
8.8992	0.53262	0.5929		8.75088	0.64254	0.04298	0.72173	0.0402		8.75088	0.64254	0.72173		8.75088	0.67897	0.05075	0.66779	0.05281		8.75088	0.68068	0.04918	0.66377	0.06431		8.75088	0.5668	0.04683	0.551	0.03211		8.75088	0.6384	0.0491	0.2605	0.04964
9.04752	0.63518	0.67533		8.8992	0.62764	0.03807	0.73221	0.04441		8.8992	0.62764	0.73221		8.8992	0.68128	0.05697	0.67155	0.07218		8.8992	0.68159	0.04753	0.68739	0.06084		8.8992	0.55519	0.04022	0.5505	0.03181		8.8992	0.66598	0.05266	0.26504	0.03126
9.19584	0.51041	0.67916		9.04752	0.63496	0.04038	0.74061	0.04063		9.04752	0.63496	0.74061		9.04752	0.66104	0.05035	0.6669	0.06016		9.04752	0.66491	0.04728	0.70515	0.0641		9.04752	0.55911	0.04347	0.55528	0.02379		9.04752	0.63987	0.06476	0.24169	0.03983
9.34416	0.53791	0.69645		9.19584	0.63848	0.04161	0.74866	0.04478		9.19584	0.63848	0.74866		9.19584	0.67465	0.05523	0.63346	0.06225		9.19584	0.67802	0.04924	0.69472	0.06517		9.19584	0.56152	0.03647	0.53165	0.03122		9.19584	0.63957	0.05976	0.25879	0.02932
9.49248	0.65835	0.85287		9.34416	0.638	0.04324	0.76338	0.04695		9.34416	0.638	0.76338		9.34416	0.67939	0.0511	0.66701	0.0543		9.34416	0.67804	0.05149	0.65782	0.06762		9.34416	0.5554	0.04072	0.55733	0.0324		9.34416	0.63263	0.05155	0.24728	0.04517
9.6408	0.57398	0.63035		9.49248	0.62963	0.04006	0.76148	0.04514		9.49248	0.62963	0.76148		9.49248	0.66167	0.05537	0.66179	0.06146		9.49248	0.69085	0.05437	0.65468	0.06037		9.49248	0.57333	0.04409	0.54267	0.03583		9.49248	0.66134	0.06353	0.2462	0.044
9.78912	0.56361	0.64499		9.6408	0.6442	0.04198	0.76391	0.04538		9.6408	0.6442	0.76391		9.6408	0.69674	0.07062	0.70265	0.08021		9.6408	0.67781	0.05343	0.65827	0.06828		9.6408	0.58549	0.04047	0.5747	0.0296		9.6408	0.67369	0.05947	0.25602	0.04974
9.93744	0.56314	0.68622		9.78912	0.64957	0.04177	0.74167	0.04376		9.78912	0.64957	0.74167		9.78912	0.6892	0.05522	0.67908	0.07433		9.78912	0.68668	0.0475	0.67599	0.05893		9.78912	0.57388	0.04306	0.56546	0.03675		9.78912	0.65156	0.06003	0.27649	0.03671
10.0858	0.59209	0.66212		9.93744	0.63656	0.0404	0.75647	0.04088		9.93744	0.63656	0.75647		9.93744	0.68327	0.05223	0.65951	0.06066		9.93744	0.69229	0.05136	0.68788	0.05803		9.93744	0.58068	0.04343	0.56582	0.02998		9.93744	0.66466	0.07946	0.27197	0.04168
10.2341	0.63097	0.67851		10.0858	0.64117	0.04211	0.77517	0.04097		10.0858	0.64117	0.77517		10.0858	0.67432	0.05485	0.68989	0.06182		10.0858	0.6783	0.05105	0.68504	0.06818		10.0858	0.59486	0.04233	0.54495	0.03033		10.0858	0.6892	0.06155	0.26421	0.03956
10.3824	0.65452	0.62636		10.2341	0.6423	0.04258	0.77786	0.04603		10.2341	0.6423	0.77786		10.2341	0.70996	0.05675	0.65422	0.06683		10.2341	0.67154	0.05313	0.65028	0.05802		10.2341	0.5908	0.04492	0.57066	0.03098		10.2341	0.65232	0.06197	0.23276	0.04083
10.5307	0.55745	0.72615		10.3824	0.64518	0.04473	0.75539	0.0436		10.3824	0.64518	0.75539		10.3824	0.69629	0.05893	0.7019	0.06402		10.3824	0.71417	0.06037	0.67344	0.06874		10.3824	0.57768	0.04557	0.56971	0.03207		10.3824	0.65468	0.05669	0.26055	0.0376
10.679	0.56937	0.78813		10.5307	0.64166	0.04339	0.74403	0.03961		10.5307	0.64166	0.74403		10.5307	0.69514	0.05202	0.67642	0.06208		10.5307	0.69637	0.05118	0.67112	0.06386		10.5307	0.58308	0.03496	0.55484	0.03557		10.5307	0.66356	0.06612	0.27144	0.03729
10.8274	0.55226	0.78522		10.679	0.65494	0.04126	0.77038	0.04232		10.679	0.65494	0.77038		10.679	0.70001	0.05612	0.68854	0.05266		10.679	0.71498	0.0494	0.69185	0.06229		10.679	0.59664	0.04551	0.56329	0.03144		10.679	0.68082	0.0617	0.26025	0.05274
10.9757	0.62065	0.79656		10.8274	0.63872	0.04077	0.75564	0.04278		10.8274	0.63872	0.75564		10.8274	0.67526	0.05579	0.65573	0.06011		10.8274	0.70224	0.05689	0.70764	0.06473		10.8274	0.585	0.04734	0.55294	0.02349		10.8274	0.65572	0.05496	0.27179	0.05015
11.124	0.58078	0.78862		10.9757	0.65518	0.04217	0.79162	0.04457		10.9757	0.65518	0.79162		10.9757	0.72356	0.06734	0.64253	0.06304		10.9757	0.68593	0.04503	0.67507	0.06149		10.9757	0.58708	0.04505	0.57601	0.0313		10.9757	0.67422	0.04643	0.25043	0.04924
11.2723	0.56341	0.74101		11.124	0.64429	0.04232	0.76082	0.04242		11.124	0.64429	0.76082		11.124	0.71205	0.05051	0.68111	0.06697		11.124	0.68096	0.05383	0.65589	0.07717		11.124	0.58648	0.04494	0.5584	0.03023		11.124	0.6856	0.06427	0.25077	0.03603
11.4206	0.544	0.74557		11.2723	0.65779	0.04292	0.78389	0.04371		11.2723	0.65779	0.78389		11.2723	0.66575	0.04443	0.68391	0.05006		11.2723	0.693	0.04654	0.65339	0.06259		11.2723	0.60489	0.04785	0.53675	0.03092		11.2723	0.68384	0.04275	0.26603	0.04458
11.569	0.51083	0.78656		11.4206	0.65163	0.04238	0.79314	0.04316		11.4206	0.65163	0.79314		11.4206	0.69028	0.05011	0.6798	0.06035		11.4206	0.69334	0.05409	0.70789	0.06493		11.4206	0.5975	0.04724	0.57038	0.0321		11.4206	0.66564	0.06774	0.26223	0.04116
11.7173	0.51136	0.57109		11.569	0.66536	0.04217	0.78189	0.04491		11.569	0.66536	0.78189		11.569	0.70889	0.06677	0.68063	0.06591		11.569	0.69103	0.05599	0.67338	0.05962		11.569	0.59622	0.04386	0.57274	0.03463		11.569	0.66002	0.06769	0.27587	0.04261
11.8656	0.65095	0.73541		11.7173	0.65322	0.04487	0.74873	0.04446		11.7173	0.65322	0.74873		11.7173	0.68934	0.04847	0.69294	0.06353		11.7173	0.71061	0.04447	0.68444	0.06225		11.7173	0.60546	0.04764	0.57752	0.03547		11.7173	0.68569	0.05995	0.26767	0.03288
12.0139	0.5106	0.71867		11.8656	0.65833	0.0415	0.77183	0.04374		11.8656	0.65833	0.77183		11.8656	0.69234	0.05644	0.70144	0.07028		11.8656	0.70868	0.04928	0.67963	0.06643		11.8656	0.59531	0.04456	0.55382	0.02914		11.8656	0.69723	0.06326	0.27337	0.04916
12.1622	0.68056	0.58993		12.0139	0.65311	0.04147	0.80591	0.03907		12.0139	0.65311	0.80591		12.0139	0.70255	0.05086	0.65855	0.0631		12.0139	0.67969	0.04441	0.67445	0.06252		12.0139	0.58502	0.04551	0.59705	0.03455		12.0139	0.68125	0.05999	0.28301	0.0427
12.3106	0.57286	0.80527		12.1622	0.67258	0.04367	0.77356	0.04118		12.1622	0.67258	0.77356		12.1622	0.67943	0.04481	0.68125	0.06468		12.1622	0.71212	0.05235	0.65125	0.06405		12.1622	0.61676	0.05633	0.58511	0.02738		12.1622	0.66955	0.06777	0.25683	0.03873
12.4589	0.50539	0.62984		12.3106	0.66838	0.04357	0.76487	0.03805		12.3106	0.66838	0.76487		12.3106	0.69649	0.05398	0.70332	0.06374		12.3106	0.71147	0.05049	0.71707	0.07066		12.3106	0.59886	0.04645	0.60494	0.03492		12.3106	0.66447	0.06655	0.27102	0.04144
12.6072	0.64531	0.74064		12.4589	0.65765	0.04133	0.7756	0.03902		12.4589	0.65765	0.7756		12.4589	0.71047	0.05273	0.69568	0.05892		12.4589	0.71023	0.05558	0.66932	0.06853		12.4589	0.60889	0.04686	0.57258	0.02938		12.4589	0.65472	0.05842	0.23992	0.03638
12.7555	0.58016	0.68362		12.6072	0.6616	0.04246	0.75967	0.04063		12.6072	0.6616	0.75967		12.6072	0.69878	0.0538	0.70995	0.06311		12.6072	0.71986	0.0498	0.70158	0.06324		12.6072	0.59566	0.03996	0.5848	0.0367		12.6072	0.67118	0.05726	0.27228	0.04067
12.9038	0.63977	0.70675		12.7555	0.64925	0.04248	0.78267	0.04044		12.7555	0.64925	0.78267		12.7555	0.69221	0.04605	0.66788	0.05499		12.7555	0.72295	0.04866	0.68537	0.07031		12.7555	0.61663	0.04849	0.56762	0.03127		12.7555	0.69633	0.06471	0.26979	0.05116
13.0522	0.57061	0.72652		12.9038	0.66339	0.04563	0.79311	0.04368		12.9038	0.66339	0.79311		12.9038	0.69684	0.05659	0.67618	0.05713		12.9038	0.69255	0.0464	0.68581	0.0658		12.9038	0.61494	0.04749	0.5708	0.03042		12.9038	0.67195	0.07701	0.2521	0.05002
13.2005	0.59118	0.71747		13.0522	0.67253	0.04326	0.79234	0.05052		13.0522	0.67253	0.79234		13.0522	0.68734	0.05201	0.71133	0.05745		13.0522	0.73277	0.05897	0.70045	0.06887		13.0522	0.62138	0.04284	0.58185	0.03218		13.0522	0.6814	0.07852	0.29068	0.04176
13.3488	0.55999	0.73246		13.2005	0.66785	0.04387	0.76552	0.04278		13.2005	0.66785	0.76552		13.2005	0.69106	0.06022	0.71217	0.06438		13.2005	0.71895	0.04992	0.69872	0.06551		13.2005	0.58952	0.04379	0.60055	0.02857		13.2005	0.67697	0.0524	0.27747	0.05
13.4971	0.61999	0.82337		13.3488	0.66792	0.04059	0.79082	0.03758		13.3488	0.66792	0.79082		13.3488	0.70937	0.05852	0.6925	0.06543		13.3488	0.71873	0.05032	0.72739	0.07243		13.3488	0.59763	0.04439	0.59302	0.02958		13.3488	0.67925	0.06646	0.29236	0.04624
13.6454	0.58753	0.73094		13.4971	0.67227	0.04191	0.78802	0.03947		13.4971	0.67227	0.78802		13.4971	0.7046	0.05442	0.69304	0.06721		13.4971	0.72278	0.04814	0.70307	0.05565		13.4971	0.60336	0.04525	0.58895	0.02819		13.4971	0.69003	0.06566	0.28023	0.0501
13.7938	0.48739	0.70536		13.6454	0.67338	0.04248	0.80362	0.04086		13.6454	0.67338	0.80362		13.6454	0.73883	0.06714	0.69371	0.06919		13.6454	0.7109	0.04979	0.69111	0.05795		13.6454	0.59738	0.0417	0.59109	0.02908		13.6454	0.68904	0.07788	0.27945	0.03845
13.9421	0.62773	0.73059		13.7938	0.67259	0.04448	0.8076	0.04184		13.7938	0.67259	0.8076		13.7938	0.70815	0.05336	0.69053	0.06098		13.7938	0.72466	0.04936	0.70777	0.06656		13.7938	0.61178	0.04608	0.59995	0.02326		13.7938	0.68159	0.06218	0.28125	0.04153
14.0904	0.59384	0.73026		13.9421	0.6628	0.04066	0.79969	0.04273		13.9421	0.6628	0.79969		13.9421	0.70966	0.0587	0.69113	0.0653		13.9421	0.74326	0.05433	0.69829	0.06422		13.9421	0.62642	0.04613	0.57159	0.0283		13.9421	0.69776	0.04945	0.28629	0.05258
14.2387	0.6365	0.75058		14.0904	0.68808	0.04573	0.76289	0.03982		14.0904	0.68808	0.76289		14.0904	0.70531	0.0603	0.70746	0.06404		14.0904	0.7161	0.05271	0.70112	0.06949		14.0904	0.61285	0.04359	0.5411	0.02857		14.0904	0.66669	0.05481	0.27795	0.05102
14.387	0.57569	0.76941		14.2387	0.65597	0.04059	0.79606	0.04417		14.2387	0.65597	0.79606		14.2387	0.73312	0.06306	0.66896	0.06772		14.2387	0.71121	0.04385	0.69822	0.06272		14.2387	0.62013	0.04292	0.58998	0.03258		14.2387	0.69095	0.07537	0.27946	0.04945
14.5354	0.65858	0.699		14.387	0.66842	0.04106	0.78373	0.0426		14.387	0.66842	0.78373		14.387	0.71995	0.0662	0.70459	0.07394		14.387	0.74579	0.05161	0.69553	0.06264		14.387	0.6221	0.04788	0.59033	0.03045		14.387	0.65296	0.05708	0.27299	0.0501
14.6837	0.65506	0.73422		14.5354	0.6818	0.04398	0.80711	0.04121		14.5354	0.6818	0.80711		14.5354	0.712	0.05383	0.702	0.06595		14.5354	0.71478	0.05332	0.70508	0.07425		14.5354	0.6349	0.04883	0.59259	0.03205		14.5354	0.67856	0.06714	0.26963	0.04009
14.832	0.66263	0.76232		14.6837	0.67514	0.045	0.80512	0.03791		14.6837	0.67514	0.80512		14.6837	0.74242	0.05983	0.67931	0.06069		14.6837	0.73957	0.05385	0.70515	0.06571		14.6837	0.61935	0.04704	0.60954	0.03765		14.6837	0.70139	0.06643	0.28044	0.04451
14.9803	0.65489	0.74215		14.832	0.67004	0.04222	0.77736	0.03969		14.832	0.67004	0.77736		14.832	0.73184	0.04937	0.71934	0.06109		14.832	0.73973	0.04643	0.70423	0.06826		14.832	0.61417	0.0446	0.61287	0.03181		14.832	0.67782	0.06427	0.28634	0.04056
15.1286	0.65492	0.78299		14.9803	0.6798	0.04512	0.79223	0.03989		14.9803	0.6798	0.79223		14.9803	0.70379	0.06247	0.69173	0.07761		14.9803	0.72857	0.06163	0.69572	0.06669		14.9803	0.60328	0.04142	0.61517	0.03101		14.9803	0.69178	0.08254	0.26942	0.06408
15.277	0.65108	0.68419		15.1286	0.68698	0.04303	0.80749	0.03974		15.1286	0.68698	0.80749		15.1286	0.70643	0.04929	0.68297	0.06822		15.1286	0.70242	0.04032	0.70727	0.05709		15.1286	0.62485	0.04494	0.62405	0.0328		15.1286	0.69872	0.05623	0.27379	0.04084
15.4253	0.57446	0.76162		15.277	0.67939	0.04475	0.79541	0.04335		15.277	0.67939	0.79541		15.277	0.72817	0.0504	0.7075	0.0813		15.277	0.72068	0.03853	0.69638	0.05937		15.277	0.63393	0.04973	0.58428	0.02983		15.277	0.71019	0.05988	0.27538	0.03758
15.5736	0.61222	0.65706		15.4253	0.6672	0.04055	0.79042	0.04067		15.4253	0.6672	0.79042		15.4253	0.72656	0.05129	0.70313	0.06096		15.4253	0.70675	0.05047	0.7366	0.06015		15.4253	0.62588	0.04694	0.59824	0.02958		15.4253	0.69358	0.05332	0.29915	0.04854
15.7219	0.60623	0.79862		15.5736	0.67121	0.03933	0.81167	0.04365		15.5736	0.67121	0.81167		15.5736	0.71394	0.06004	0.71462	0.0525		15.5736	0.72054	0.05219	0.6976	0.064		15.5736	0.64666	0.05043	0.60986	0.02884		15.5736	0.67464	0.07649	0.29754	0.04424
15.8702	0.66235	0.79777		15.7219	0.68151	0.04492	0.76963	0.04072		15.7219	0.68151	0.76963		15.7219	0.72251	0.06712	0.69317	0.0654		15.7219	0.7148	0.04618	0.694	0.05863		15.7219	0.63514	0.04476	0.59416	0.03359		15.7219	0.70218	0.05897	0.29074	0.04612
16.0186	0.58944	0.69841		15.8702	0.67846	0.04512	0.78582	0.0399		15.8702	0.67846	0.78582		15.8702	0.71767	0.06389	0.70768	0.06532		15.8702	0.74741	0.04508	0.68468	0.06035		15.8702	0.64977	0.049	0.57979	0.03002		15.8702	0.70442	0.07103	0.27799	0.04817
16.1669	0.68575	0.72028		16.0186	0.69422	0.04736	0.79957	0.04393		16.0186	0.69422	0.79957		16.0186	0.74919	0.05533	0.69195	0.05517		16.0186	0.71207	0.05771	0.73126	0.06746		16.0186	0.64348	0.04877	0.60926	0.03366		16.0186	0.7022	0.06224	0.28956	0.05459
16.3152	0.59933	0.66482		16.1669	0.67792	0.04193	0.82197	0.04552		16.1669	0.67792	0.82197		16.1669	0.7252	0.06035	0.71415	0.06711		16.1669	0.74163	0.04561	0.69216	0.06132		16.1669	0.62297	0.04569	0.629	0.0299		16.1669	0.71287	0.0832	0.31616	0.04411
16.4635	0.65807	0.73924		16.3152	0.68478	0.04611	0.80036	0.04667		16.3152	0.68478	0.80036		16.3152	0.72162	0.05096	0.708	0.07115		16.3152	0.731	0.0433	0.71099	0.06041		16.3152	0.63784	0.05066	0.6129	0.03172		16.3152	0.70639	0.06671	0.26854	0.04543
16.6118	0.65135	0.87845		16.4635	0.68305	0.04168	0.80678	0.04062		16.4635	0.68305	0.80678		16.4635	0.73038	0.05338	0.70483	0.055		16.4635	0.72345	0.04938	0.73144	0.06351		16.4635	0.62866	0.04779	0.6018	0.02743		16.4635	0.68834	0.09367	0.27665	0.04197
16.7602	0.70166	0.75909		16.6118	0.67858	0.0424	0.77716	0.03747		16.6118	0.67858	0.77716		16.6118	0.74109	0.0591	0.65294	0.05552		16.6118	0.74451	0.05069	0.70705	0.05484		16.6118	0.66162	0.04616	0.59634	0.02662		16.6118	0.68855	0.07935	0.28538	0.04465
16.9085	0.66483	0.72294		16.7602	0.68919	0.04647	0.82508	0.04216		16.7602	0.68919	0.82508		16.7602	0.71778	0.05387	0.71004	0.06303		16.7602	0.73393	0.04755	0.71103	0.06241		16.7602	0.64068	0.0483	0.59751	0.02439		16.7602	0.71796	0.0862	0.29523	0.0541
17.0568	0.62903	0.82957		16.9085	0.68445	0.04378	0.79748	0.04242		16.9085	0.68445	0.79748		16.9085	0.7359	0.052	0.72163	0.05487		16.9085	0.70613	0.04936	0.73776	0.06507		16.9085	0.61918	0.04156	0.59766	0.02896		16.9085	0.7087	0.07881	0.28223	0.04026
17.2051	0.6721	0.5736		17.0568	0.69448	0.0421	0.80972	0.0367		17.0568	0.69448	0.80972		17.0568	0.74623	0.05503	0.71866	0.06108		17.0568	0.76094	0.04347	0.70141	0.06747		17.0568	0.65449	0.04802	0.60521	0.03179		17.0568	0.69473	0.07232	0.28461	0.03725
17.3534	0.62979	0.7031		17.2051	0.69174	0.04357	0.78038	0.04272		17.2051	0.69174	0.78038		17.2051	0.74914	0.06539	0.71936	0.06896		17.2051	0.72239	0.04374	0.70675	0.053		17.2051	0.65532	0.04707	0.58903	0.02753		17.2051	0.72556	0.08853	0.29924	0.0588
17.5018	0.53155	0.75257		17.3534	0.6892	0.04219	0.80687	0.04431		17.3534	0.6892	0.80687		17.3534	0.72737	0.05422	0.7182	0.06365		17.3534	0.74363	0.04698	0.70946	0.0626		17.3534	0.64919	0.05444	0.61645	0.03379		17.3534	0.68969	0.08229	0.28727	0.03547
17.6501	0.6369	0.71324		17.5018	0.68614	0.04448	0.78474	0.04268		17.5018	0.68614	0.78474		17.5018	0.7221	0.0527	0.69338	0.06258		17.5018	0.73702	0.05005	0.73301	0.05771		17.5018	0.63877	0.04532	0.61328	0.03561		17.5018	0.69807	0.07884	0.26914	0.03828
17.7984	0.56986	0.71319		17.6501	0.68752	0.04274	0.79776	0.04185		17.6501	0.68752	0.79776		17.6501	0.72475	0.05773	0.68867	0.05949		17.6501	0.74599	0.04905	0.73316	0.05753		17.6501	0.65236	0.05136	0.6179	0.02771		17.6501	0.7261	0.05605	0.31178	0.04578
17.9467	0.6115	0.78637		17.7984	0.6826	0.04268	0.82263	0.04047		17.7984	0.6826	0.82263		17.7984	0.74603	0.05419	0.7067	0.06764		17.7984	0.75894	0.05115	0.72094	0.06094		17.7984	0.65109	0.04768	0.64233	0.03347		17.7984	0.71389	0.05861	0.28491	0.04989
18.095	0.73794	0.71934		17.9467	0.67515	0.04244	0.79111	0.04183		17.9467	0.67515	0.79111		17.9467	0.74545	0.04983	0.67193	0.06052		17.9467	0.74026	0.05588	0.72338	0.06607		17.9467	0.64747	0.04775	0.62598	0.03379		17.9467	0.69544	0.0731	0.28466	0.03519
18.2434	0.62784	0.60251		18.095	0.69162	0.04389	0.80791	0.04613		18.095	0.69162	0.80791		18.095	0.71815	0.04707	0.7167	0.07564		18.095	0.74018	0.05224	0.72533	0.06269		18.095	0.64711	0.04227	0.59942	0.02739		18.095	0.68081	0.08142	0.3092	0.04623
18.3917	0.6994	0.71363		18.2434	0.68621	0.0421	0.78937	0.04497		18.2434	0.68621	0.78937		18.2434	0.73914	0.06355	0.71084	0.07229		18.2434	0.74001	0.05513	0.69309	0.05677		18.2434	0.64157	0.04199	0.59849	0.03025		18.2434	0.68089	0.05833	0.31901	0.0413
18.54	0.56483	0.59827		18.3917	0.70012	0.04608	0.7917	0.04205		18.3917	0.70012	0.7917		18.3917	0.73779	0.05617	0.71807	0.0636		18.3917	0.75244	0.05392	0.72149	0.06274		18.3917	0.66409	0.04858	0.60721	0.02729		18.3917	0.68028	0.07726	0.30643	0.05303
18.6883	0.59846	0.80379		18.54	0.68064	0.0422	0.83229	0.04451		18.54	0.68064	0.83229		18.54	0.76184	0.06651	0.69917	0.07103		18.54	0.74124	0.05035	0.71492	0.0587		18.54	0.66597	0.04976	0.621	0.02911		18.54	0.70205	0.06903	0.29619	0.05053
18.8366	0.60782	0.71505		18.6883	0.68024	0.04476	0.80027	0.04061		18.6883	0.68024	0.80027		18.6883	0.76448	0.0516	0.69343	0.07262		18.6883	0.76519	0.04981	0.70126	0.05529		18.6883	0.67274	0.05578	0.61919	0.02783		18.6883	0.703	0.06871	0.28033	0.0496
18.985	0.62953	0.73032		18.8366	0.69814	0.04497	0.80159	0.04091		18.8366	0.69814	0.80159		18.8366	0.74819	0.06481	0.69497	0.06169		18.8366	0.75959	0.04856	0.7265	0.06194		18.8366	0.68599	0.05676	0.62001	0.02732		18.8366	0.68955	0.09715	0.29497	0.04157
19.1333	0.64044	0.79852		18.985	0.69462	0.04479	0.8042	0.04186		18.985	0.69462	0.8042		18.985	0.71884	0.0505	0.67085	0.05772		18.985	0.73879	0.04501	0.73083	0.07397		18.985	0.65181	0.049	0.63354	0.02719		18.985	0.68701	0.08896	0.28594	0.04589
19.2816	0.55342	0.86178		19.1333	0.70078	0.04275	0.80845	0.04238		19.1333	0.70078	0.80845		19.1333	0.75019	0.05387	0.69604	0.06925		19.1333	0.74591	0.05004	0.69002	0.06296		19.1333	0.66498	0.04857	0.63814	0.02958		19.1333	0.6977	0.09141	0.311	0.04446
19.4299	0.68668	0.61611		19.2816	0.69011	0.04557	0.77741	0.04161		19.2816	0.69011	0.77741		19.2816	0.72711	0.05096	0.66549	0.06267		19.2816	0.74832	0.04906	0.70607	0.05652		19.2816	0.66299	0.04698	0.60869	0.02802		19.2816	0.71278	0.07708	0.308	0.0465
19.5782	0.57799	0.71249		19.4299	0.69338	0.04171	0.78824	0.0439		19.4299	0.69338	0.78824		19.4299	0.73709	0.04583	0.71719	0.06519		19.4299	0.75344	0.03847	0.7166	0.06273		19.4299	0.66228	0.05109	0.61044	0.0306		19.4299	0.70037	0.07922	0.29613	0.0438
19.7266	0.74196	0.80977		19.5782	0.68473	0.04255	0.80149	0.04256		19.5782	0.68473	0.80149		19.5782	0.7711	0.07015	0.67177	0.06037		19.5782	0.7634	0.05848	0.69103	0.06464		19.5782	0.65192	0.04377	0.62716	0.0289		19.5782	0.70197	0.0823	0.29625	0.03973
19.8749	0.63118	0.77257		19.7266	0.69623	0.0421	0.79408	0.04247		19.7266	0.69623	0.79408		19.7266	0.73058	0.05791	0.7247	0.07658		19.7266	0.72129	0.05618	0.71432	0.06834		19.7266	0.65605	0.04612	0.62759	0.02826		19.7266	0.70113	0.07896	0.28961	0.04414
20.0232	0.67396	0.6692		19.8749	0.68133	0.04275	0.80753	0.04657		19.8749	0.68133	0.80753		19.8749	0.72676	0.05134	0.69498	0.06023		19.8749	0.7373	0.05253	0.7056	0.06271		19.8749	0.66135	0.05029	0.63063	0.03353		19.8749	0.69537	0.05895	0.29798	0.03561
20.1715	0.69079	0.89335		20.0232	0.69994	0.04488	0.78414	0.04311		20.0232	0.69994	0.78414		20.0232	0.75099	0.05929	0.70583	0.0801		20.0232	0.75469	0.05627	0.71324	0.05973		20.0232	0.67248	0.05071	0.61613	0.03075		20.0232	0.7222	0.07406	0.29993	0.03815
20.3198	0.6554	0.79383		20.1715	0.70502	0.04582	0.79457	0.04696		20.1715	0.70502	0.79457		20.1715	0.73353	0.05363	0.70183	0.06156		20.1715	0.74493	0.06257	0.69217	0.05693		20.1715	0.65505	0.04648	0.6185	0.03254		20.1715	0.72372	0.07966	0.304	0.05223
20.4682	0.69362	0.75741		20.3198	0.69874	0.04231	0.80183	0.04692		20.3198	0.69874	0.80183		20.3198	0.76279	0.05595	0.6987	0.07704		20.3198	0.72411	0.04932	0.716	0.06207		20.3198	0.6677	0.04905	0.62529	0.02879		20.3198	0.72921	0.07522	0.2961	0.04481
20.6165	0.68856	0.7167		20.4682	0.69971	0.04536	0.8134	0.04329		20.4682	0.69971	0.8134		20.4682	0.76668	0.05256	0.73718	0.07454		20.4682	0.74687	0.05434	0.70124	0.06104		20.4682	0.66289	0.04792	0.62674	0.03356		20.4682	0.70411	0.08129	0.30383	0.0368
20.7648	0.65968	0.67091		20.6165	0.70109	0.04377	0.81258	0.04301		20.6165	0.70109	0.81258		20.6165	0.74849	0.06293	0.71132	0.06935		20.6165	0.78508	0.04947	0.70157	0.04897		20.6165	0.67387	0.04594	0.61242	0.0288		20.6165	0.70028	0.07647	0.30305	0.05894
20.9131	0.59331	0.86028		20.7648	0.69333	0.04425	0.81537	0.04175		20.7648	0.69333	0.81537		20.7648	0.75015	0.05804	0.75829	0.08344		20.7648	0.75704	0.04988	0.72378	0.06189		20.7648	0.65056	0.04947	0.60542	0.02861		20.7648	0.71757	0.07428	0.30887	0.04397
21.0614	0.69461	0.64551		20.9131	0.7047	0.04519	0.79863	0.0432		20.9131	0.7047	0.79863		20.9131	0.74267	0.06151	0.73801	0.07482		20.9131	0.74278	0.05214	0.70041	0.05722		20.9131	0.67397	0.05295	0.63076	0.03267		20.9131	0.73168	0.07522	0.29949	0.03586
21.2098	0.69004	0.73702		21.0614	0.69866	0.04337	0.81436	0.04563		21.0614	0.69866	0.81436		21.0614	0.74444	0.05087	0.68461	0.06929		21.0614	0.74219	0.05093	0.70326	0.05983		21.0614	0.63619	0.04199	0.63496	0.02706		21.0614	0.71565	0.08687	0.30276	0.03685
21.3581	0.68263	0.5825		21.2098	0.70858	0.04392	0.82642	0.04449		21.2098	0.70858	0.82642		21.2098	0.74543	0.05684	0.67819	0.06731		21.2098	0.74468	0.05122	0.6978	0.05501		21.2098	0.65028	0.04453	0.63058	0.02949		21.2098	0.73519	0.06481	0.30174	0.04474
21.5064	0.67566	0.82128		21.3581	0.68698	0.04309	0.79814	0.04224		21.3581	0.68698	0.79814		21.3581	0.77109	0.0626	0.70273	0.07174		21.3581	0.74248	0.0624	0.68722	0.06192		21.3581	0.64965	0.04526	0.64233	0.03232		21.3581	0.72564	0.06048	0.30061	0.0483
21.6547	0.5891	0.75401		21.5064	0.69134	0.04294	0.80658	0.04507		21.5064	0.69134	0.80658		21.5064	0.7191	0.06079	0.7377	0.06697		21.5064	0.76222	0.06768	0.72972	0.06894		21.5064	0.66129	0.04886	0.64557	0.03048		21.5064	0.72262	0.06578	0.31218	0.046
21.803	0.73481	0.78661		21.6547	0.69158	0.04434	0.82379	0.04538		21.6547	0.69158	0.82379		21.6547	0.78816	0.0543	0.68125	0.07515		21.6547	0.76535	0.05989	0.69237	0.06061		21.6547	0.66463	0.05406	0.62879	0.03222		21.6547	0.68153	0.06041	0.31657	0.04744
21.9514	0.66175	0.71427		21.803	0.6904	0.04289	0.80239	0.0435		21.803	0.6904	0.80239		21.803	0.74463	0.05687	0.68368	0.06485		21.803	0.73684	0.05492	0.71429	0.06826		21.803	0.64952	0.04521	0.61352	0.02981		21.803	0.72644	0.08382	0.31773	0.04976
22.0997	0.59448	0.76041		21.9514	0.70634	0.04796	0.78128	0.04235		21.9514	0.70634	0.78128		21.9514	0.79699	0.06683	0.72645	0.07508		21.9514	0.76394	0.04641	0.69701	0.06114		21.9514	0.6768	0.04894	0.61818	0.03129		21.9514	0.69465	0.0889	0.32377	0.03546
22.248	0.71346	0.75699		22.0997	0.69466	0.0452	0.80329	0.04135		22.0997	0.69466	0.80329		22.0997	0.76496	0.05122	0.69542	0.06723		22.0997	0.75254	0.05299	0.72923	0.07107		22.0997	0.63069	0.04158	0.62539	0.03119		22.0997	0.70964	0.08261	0.30616	0.04922
22.3963	0.62503	0.76137		22.248	0.69706	0.04081	0.82166	0.04443		22.248	0.69706	0.82166		22.248	0.72997	0.05708	0.72579	0.07127		22.248	0.76473	0.04867	0.69729	0.06127		22.248	0.66266	0.05412	0.6134	0.02773		22.248	0.70081	0.07477	0.31073	0.04848
22.5446	0.55272	0.68318		22.3963	0.7146	0.04407	0.79511	0.04441		22.3963	0.7146	0.79511		22.3963	0.74152	0.05516	0.72011	0.07075		22.3963	0.75925	0.05966	0.7035	0.0587		22.3963	0.66134	0.04669	0.61859	0.03075		22.3963	0.71997	0.08883	0.30004	0.04468
22.693	0.69896	0.77859		22.5446	0.70463	0.04339	0.81281	0.04263		22.5446	0.70463	0.81281		22.5446	0.71901	0.06098	0.72247	0.06527		22.5446	0.75978	0.048	0.71365	0.05279		22.5446	0.66619	0.04904	0.63283	0.02569		22.5446	0.72693	0.06797	0.30421	0.05142
22.8413	0.55443	0.77339		22.693	0.69419	0.04303	0.83997	0.0448		22.693	0.69419	0.83997		22.693	0.75355	0.06808	0.68425	0.07132		22.693	0.74329	0.06298	0.6882	0.0657		22.693	0.67556	0.04863	0.6469	0.02814		22.693	0.69232	0.0674	0.31886	0.04103
22.9896	0.68643	0.863		22.8413	0.69769	0.0453	0.84116	0.0418		22.8413	0.69769	0.84116		22.8413	0.76476	0.06606	0.69899	0.07321		22.8413	0.75554	0.05981	0.70042	0.06621		22.8413	0.66512	0.04532	0.62186	0.03063		22.8413	0.72898	0.08125	0.31208	0.04493
23.1379	0.78361	0.77251		22.9896	0.69285	0.04426	0.77729	0.04138		22.9896	0.69285	0.77729		22.9896	0.74491	0.05914	0.73717	0.0687		22.9896	0.76858	0.05907	0.7209	0.06207		22.9896	0.65844	0.0481	0.60416	0.03327		22.9896	0.72353	0.07684	0.33539	0.04832
23.2862	0.63937	0.68828		23.1379	0.68903	0.04187	0.8201	0.03967		23.1379	0.68903	0.8201		23.1379	0.75072	0.04694	0.72663	0.06494		23.1379	0.73328	0.04582	0.68239	0.05584		23.1379	0.68501	0.0516	0.632	0.03071		23.1379	0.72893	0.07993	0.31547	0.04768
23.4346	0.6951	0.63035		23.2862	0.70581	0.04215	0.8128	0.04233		23.2862	0.70581	0.8128		23.2862	0.72908	0.05539	0.73952	0.07679		23.2862	0.75225	0.04827	0.70415	0.0697		23.2862	0.66744	0.04598	0.62027	0.03371		23.2862	0.70968	0.07496	0.31889	0.05997
23.5829	0.72271	0.80863		23.4346	0.70786	0.04364	0.79523	0.0399		23.4346	0.70786	0.79523		23.4346	0.7631	0.05917	0.71215	0.07064		23.4346	0.75824	0.05234	0.70072	0.06616		23.4346	0.66463	0.04748	0.64107	0.03203		23.4346	0.72851	0.07865	0.3445	0.04955
23.7312	0.68935	0.82358		23.5829	0.70911	0.04734	0.83231	0.04406		23.5829	0.70911	0.83231		23.5829	0.77642	0.05531	0.73542	0.08009		23.5829	0.75531	0.06616	0.70817	0.06063		23.5829	0.67495	0.04793	0.68338	0.03375		23.5829	0.73508	0.08576	0.31878	0.04349
23.8795	0.68556	0.73312		23.7312	0.69807	0.04294	0.8151	0.04134		23.7312	0.69807	0.8151		23.7312	0.75843	0.05566	0.68368	0.07408		23.7312	0.74823	0.05675	0.68869	0.05908		23.7312	0.67188	0.05267	0.63112	0.0291		23.7312	0.735	0.07619	0.31271	0.04038
24.0278	0.6887	0.77999		23.8795	0.69306	0.04238	0.8378	0.04157		23.8795	0.69306	0.8378		23.8795	0.77652	0.06633	0.74126	0.0709		23.8795	0.75488	0.05643	0.69547	0.07026		23.8795	0.6678	0.04925	0.6266	0.03512		23.8795	0.75103	0.0777	0.30964	0.05138
24.1762	0.70544	0.65414		24.0278	0.69742	0.04505	0.81856	0.04564		24.0278	0.69742	0.81856		24.0278	0.75423	0.06143	0.7196	0.06618		24.0278	0.76979	0.05213	0.69269	0.07081		24.0278	0.66231	0.04908	0.62931	0.02846		24.0278	0.70868	0.07462	0.3218	0.03491
24.3245	0.69439	0.85855		24.1762	0.72096	0.0455	0.80734	0.04429		24.1762	0.72096	0.80734		24.1762	0.77293	0.06199	0.69954	0.07944		24.1762	0.75056	0.04718	0.69307	0.06105		24.1762	0.66253	0.04357	0.62215	0.03198		24.1762	0.68354	0.0719	0.29738	0.04446
24.4728	0.74159	0.81461		24.3245	0.71238	0.0457	0.84617	0.04519		24.3245	0.71238	0.84617		24.3245	0.77384	0.06162	0.71158	0.07782		24.3245	0.78258	0.05099	0.69763	0.05978		24.3245	0.67678	0.05692	0.62317	0.02924		24.3245	0.73285	0.05826	0.32259	0.04855
24.6211	0.6315	0.7647		24.4728	0.70201	0.04345	0.81277	0.03963		24.4728	0.70201	0.81277		24.4728	0.77594	0.06201	0.72054	0.06786		24.4728	0.73705	0.05323	0.72472	0.06575		24.4728	0.64833	0.04294	0.63982	0.0342		24.4728	0.72579	0.07441	0.32076	0.05932
24.7694	0.68979	0.70112		24.6211	0.70178	0.0444	0.81991	0.04224		24.6211	0.70178	0.81991		24.6211	0.79331	0.05401	0.70153	0.07537		24.6211	0.73559	0.05296	0.69108	0.05911		24.6211	0.68827	0.05179	0.64038	0.02772		24.6211	0.72964	0.08532	0.32373	0.04617
24.9178	0.65068	0.69669		24.7694	0.70892	0.04514	0.82004	0.04106		24.7694	0.70892	0.82004		24.7694	0.77443	0.05826	0.73931	0.07504		24.7694	0.74543	0.05148	0.72915	0.06987		24.7694	0.6628	0.04343	0.67291	0.03531		24.7694	0.77063	0.08428	0.30611	0.04464
25.0661	0.72039	0.78786		24.9178	0.70982	0.04456	0.79771	0.04042		24.9178	0.70982	0.79771		24.9178	0.75859	0.04548	0.72381	0.07128		24.9178	0.73634	0.05444	0.70034	0.06785		24.9178	0.66744	0.0492	0.64755	0.03485		24.9178	0.7296	0.07299	0.3284	0.05301
25.2144	0.77443	0.75984		25.0661	0.68723	0.04315	0.81447	0.03658		25.0661	0.68723	0.81447		25.0661	0.73278	0.05557	0.70802	0.06517		25.0661	0.72038	0.05538	0.68766	0.07254		25.0661	0.68526	0.04976	0.64817	0.0363		25.0661	0.72139	0.07668	0.30489	0.048
25.3627	0.75519	0.84229		25.2144	0.70353	0.04428	0.82649	0.03815		25.2144	0.70353	0.82649		25.2144	0.73516	0.04707	0.71718	0.08419		25.2144	0.75128	0.05185	0.72603	0.06339		25.2144	0.67022	0.05341	0.64326	0.03844		25.2144	0.71822	0.08814	0.31319	0.04359
25.511	0.65969	0.75699		25.3627	0.71353	0.04678	0.86286	0.03896		25.3627	0.71353	0.86286		25.3627	0.77207	0.05288	0.71165	0.07115		25.3627	0.76219	0.04831	0.70471	0.0573		25.3627	0.66123	0.0441	0.64385	0.02598		25.3627	0.70346	0.09027	0.31626	0.04459
25.6594	0.75184	0.70205		25.511	0.71511	0.04666	0.83593	0.04208		25.511	0.71511	0.83593		25.511	0.76346	0.06268	0.74159	0.07155		25.511	0.76939	0.05254	0.73659	0.06346		25.511	0.67717	0.04685	0.66656	0.03366		25.511	0.71308	0.06957	0.28951	0.04224
25.8077	0.62329	0.82767		25.6594	0.69554	0.04537	0.8129	0.03992		25.6594	0.69554	0.8129		25.6594	0.76174	0.06068	0.73468	0.07052		25.6594	0.76308	0.05673	0.69982	0.06482		25.6594	0.69298	0.04688	0.66428	0.03342		25.6594	0.72618	0.07431	0.31616	0.04137
25.956	0.71352	0.80963		25.8077	0.70652	0.04417	0.82	0.04447		25.8077	0.70652	0.82		25.8077	0.76359	0.05963	0.68361	0.07791		25.8077	0.77349	0.05489	0.69015	0.06634		25.8077	0.67195	0.04629	0.61663	0.02934		25.8077	0.72147	0.06831	0.30239	0.04413
26.1043	0.78185	0.68362		25.956	0.70755	0.04469	0.8185	0.04387		25.956	0.70755	0.8185		25.956	0.76372	0.06189	0.72837	0.08795		25.956	0.76836	0.06077	0.68584	0.06333		25.956	0.67746	0.04776	0.63644	0.0294		25.956	0.72706	0.07879	0.31411	0.05409
26.2526	0.69564	0.7177		26.1043	0.70907	0.04374	0.81491	0.04538		26.1043	0.70907	0.81491		26.1043	0.78769	0.06478	0.73978	0.0844		26.1043	0.7534	0.04348	0.71258	0.06388		26.1043	0.67825	0.04449	0.64187	0.03272		26.1043	0.72464	0.08895	0.30101	0.0439
26.401	0.69334	0.68465		26.2526	0.71029	0.04863	0.84424	0.04856		26.2526	0.71029	0.84424		26.2526	0.75826	0.05936	0.73774	0.07144		26.2526	0.77157	0.05787	0.67629	0.05946		26.2526	0.66765	0.04669	0.67233	0.02996		26.2526	0.71754	0.0804	0.31212	0.05339
	0.71175	0.72254		26.401	0.72314	0.04654	0.81369	0.04461		26.401	0.72314	0.81369		26.401	0.73966	0.05309	0.7368	0.08028		26.401	0.77259	0.05876	0.68207	0.05617		26.401	0.65429	0.04185	0.65467	0.03228		26.401	0.72349	0.07086	0.30947	0.04734
	0.78479	0.71662				--	--	--				--		26.5493	0.81114	0.06408	0.76018	0.07273		26.5493	--	--	0.76018	0.07273		26.5493	--	--	--	--		--		--	--	--
	0.64847	0.69485												26.6976	0.74811	0.0684	0.70699	0.0735		26.6976	--	--	0.70699	0.0735		26.6976	--	--	--	--		--		--	--	--
	0.63723	0.87113												26.8459	0.79229	0.06653	0.73441	0.07318		26.8459	--	--	0.73441	0.07318		26.8459	--	--	--	--		--		--	--	--
	0.70858	0.79678												26.9942	0.75285	0.05262	0.72124	0.08351		26.9942	--	--	0.72124	0.08351		26.9942	--	--	--	--		--		--	--	--
	0.68827	0.71038												27.1426	0.77402	0.06169	0.73204	0.0756		27.1426	--	--	0.73204	0.0756		27.1426	--	--	--	--		--		--	--	--
	0.76558	0.86697												27.2909	0.77269	0.06735	0.75317	0.06602		27.2909	--	--	0.75317	0.06602		27.2909	--	--	--	--		--		--	--	--
	0.73806	0.76938												27.4392	0.80195	0.06357	0.7514	0.0755		27.4392	--	--	0.7514	0.0755		27.4392	--	--	--	--		--		--	--	--
	0.66436	0.70274												27.5875	0.76436	0.05415	0.79012	0.08138		27.5875	--	--	0.79012	0.08138		27.5875	--	--	--	--		--		--	--	--
	0.77099	0.74896												27.7358	0.73585	0.06066	0.71411	0.08691		27.7358	--	--	0.71411	0.08691		27.7358	--	--	--	--		--		--	--	--
	0.76089	0.751												27.8842	0.78007	0.05855	0.74296	0.07169		27.8842	--	--	0.74296	0.07169		27.8842	--	--	--	--		--		--	--	--
	0.69029	0.74346												28.0325	0.78851	0.06603	0.74979	0.07334		28.0325	--	--	0.74979	0.07334		28.0325	--	--	--	--		--		--	--	--
	0.78544	0.81657												28.1808	0.78172	0.06425	0.77089	0.07594		28.1808	--	--	0.77089	0.07594		28.1808	--	--	--	--		--		--	--	--
	0.79286	0.72625												28.3291	0.76911	0.04921	0.7077	0.07438		28.3291	--	--	0.7077	0.07438		28.3291	--	--	--	--		--		--	--	--
	0.60331	0.67481												28.4774	0.7656	0.05538	0.7194	0.07303		28.4774	--	--	0.7194	0.07303		28.4774	--	--	--	--		--		--	--	--
	0.8614	0.81565												28.6258	0.79015	0.06392	0.77166	0.0728		28.6258	--	--	0.77166	0.0728		28.6258	--	--	--	--		--		--	--	--
	0.7571	0.8634												28.7741	0.76784	0.05898	0.72496	0.05871		28.7741	--	--	0.72496	0.05871		28.7741	--	--	--	--		--		--	--	--
	0.76281	0.67453												28.9224	0.77337	0.05604	0.75452	0.07291		28.9224	--	--	0.75452	0.07291		28.9224	--	--	--	--		--		--	--	--
	0.74393	0.62032												29.0707	0.77778	0.06304	0.7329	0.06606		29.0707	--	--	0.7329	0.06606		29.0707	--	--	--	--
	0.87185	0.80349												29.219	0.78464	0.05853	0.72882	0.07279		29.219	--	--	0.72882	0.07279		29.219	--	--	--	--
	0.76329	0.75572												29.3674	0.76847	0.06106	0.71441	0.07268		29.3674	--	--	0.71441	0.07268		29.3674	--	--	--	--
