# Supplementary material for: Rapid recycling of glutamate transporters on the astroglial surface
Source: eLife. 2021 Apr 16;10:e64714. doi: 10.7554/eLife.64714 (PMC8079145; doi:10.7554/eLife.64714)
Supplement: Figure 5—source data 1. [file elife-64714-fig5-data1.xlsx]

## Sheet: Figure 5
Figure 5 C								Figure 5 D						Figure 5 E						Figure 5 F						Figure 5 G						Figure 5 H
Time, s	D_Cntrl	95CI	D_4AP	95CI	D_TTX	95CI		Time, s	F, pre	95CI	F, post	95CI		Time, s	F, pre	95CI	F, post	95CI		Time, s	F, pre	95CI	F, post	95CI		Time, s	F, pre	95CI	F, post	95CI		Time, s	95CI	F, post	95CI	SEM
-7.56432	1.01834	0.02658	1.01587	0.01712	1.01781	0.01838		-7.56432	1.02509	0.05304	1.02434	1.02434		-7.56432	1.03809	0.02844	1.03246	0.03937		-7.56432	0.97851	0.02923	1.00067	0.02705		-7.56432	1.05982	0.05579	1.02721	0.04113		-7.56432	1.02195	0.03435	1.04029	0.03034
-7.416	1.03713	0.0227	1.03955	0.02134	1.03114	0.01732		-7.416	1.09076	0.04978	1.01939	1.01939		-7.416	1.04702	0.01768	1.04282	0.03167		-7.416	0.99703	0.02941	1.00968	0.02992		-7.416	1.04405	0.03746	0.99724	0.04261		-7.416	1.04058	0.0311	1.04961	0.04213
-7.26768	1.01419	0.02147	1.03487	0.01766	1.0341	0.01586		-7.26768	1.05143	0.05096	1.03419	1.03419		-7.26768	1.03717	0.02125	1.01872	0.03546		-7.26768	1.01177	0.02236	1.02944	0.02374		-7.26768	1.02736	0.0292	1.00754	0.03475		-7.26768	1.03418	0.03144	1.0338	0.03265
-7.11936	1.02237	0.02309	1.0267	0.02227	1.02693	0.01702		-7.11936	1.03853	0.04303	1.07297	1.07297		-7.11936	1.04652	0.02633	1.0239	0.02322		-7.11936	0.98082	0.02444	1.00072	0.02688		-7.11936	1.04801	0.0597	0.99361	0.03956		-7.11936	1.01306	0.02867	1.03374	0.0328
-6.97104	1.01159	0.02099	1.02144	0.01854	1.02648	0.01618		-6.97104	1.06954	0.03979	1.05761	1.05761		-6.97104	1.04779	0.02383	1.01565	0.02914		-6.97104	1.01484	0.01765	1.03096	0.02903		-6.97104	1.0438	0.04462	1.06321	0.03793		-6.97104	1.01663	0.02976	1.02904	0.02774
-6.82272	1.02072	0.0233	1.02301	0.02435	1.01504	0.01714		-6.82272	1.07117	0.0413	1.02338	1.02338		-6.82272	1.02855	0.02227	1.01688	0.0263		-6.82272	1.01216	0.02051	1.01633	0.02585		-6.82272	1.00604	0.03173	1.00077	0.04933		-6.82272	1.02539	0.02131	1.0099	0.03102
-6.6744	1.02393	0.02225	1.01412	0.01819	1.01364	0.01396		-6.6744	1.06053	0.04615	1.01181	1.01181		-6.6744	1.02267	0.02497	1.04211	0.03093		-6.6744	1.00262	0.02417	0.98939	0.01934		-6.6744	1.00876	0.04578	0.98997	0.0286		-6.6744	1.02176	0.02615	1.04118	0.02937
-6.52608	1.02305	0.01863	1.00885	0.01926	1.03901	0.01883		-6.52608	1.06223	0.04925	1.01366	1.01366		-6.52608	1.02802	0.02546	1.02578	0.01975		-6.52608	1.01676	0.02319	1.00156	0.02004		-6.52608	1.03353	0.0406	1.0222	0.04522		-6.52608	1.02114	0.02319	1.03322	0.0224
-6.37776	1.01463	0.01772	1.00931	0.02208	1.01387	0.01441		-6.37776	1.06769	0.04595	1.00992	1.00992		-6.37776	1.04438	0.01928	1.02442	0.02259		-6.37776	0.98814	0.02625	1.02	0.02189		-6.37776	1.02686	0.04668	1.02072	0.03681		-6.37776	1.025	0.02655	1.04304	0.0321
-6.22944	1.02079	0.0227	1.01732	0.01777	1.02199	0.01529		-6.22944	1.02892	0.04531	1.01885	1.01885		-6.22944	1.03217	0.02501	1.00576	0.02285		-6.22944	1.0066	0.01645	1.00105	0.0191		-6.22944	1.02802	0.03956	1.02556	0.04354		-6.22944	0.99641	0.02353	1.02876	0.02656
-6.08112	1.00133	0.02385	1.01661	0.02113	1.00004	0.01494		-6.08112	1.00108	0.04742	1.00694	1.00694		-6.08112	1.03896	0.02576	0.99963	0.02207		-6.08112	1.025	0.02656	0.9964	0.02101		-6.08112	1.01821	0.03772	0.97878	0.03685		-6.08112	1.0166	0.02297	1.01946	0.0217
-5.9328	1.00499	0.01954	1.02359	0.01864	1.00282	0.01566		-5.9328	1.00395	0.02975	1.00007	1.00007		-5.9328	1.0121	0.02175	1.00572	0.02015		-5.9328	1.0104	0.02175	1.00597	0.01878		-5.9328	1.00897	0.03007	1.00389	0.02777		-5.9328	1.03274	0.02212	1.0443	0.02833
-5.78448	1.00654	0.01846	1.00789	0.02183	1.00841	0.01615		-5.78448	1.02491	0.03417	1.01288	1.01288		-5.78448	1.03328	0.01703	1.0096	0.02277		-5.78448	0.99449	0.02384	1.00109	0.0235		-5.78448	1.01865	0.03507	1.00427	0.04126		-5.78448	1.02885	0.02029	1.01601	0.02278
-5.63616	0.99624	0.02337	1.01301	0.01833	1.01385	0.01492		-5.63616	1.03814	0.0341	1.05379	1.05379		-5.63616	1.03397	0.02344	1.02114	0.0244		-5.63616	1.00389	0.01931	0.99138	0.02371		-5.63616	1.01185	0.05315	1.02285	0.04002		-5.63616	1.00414	0.0292	1.02421	0.02838
-5.48784	1.00655	0.02044	1.01339	0.0197	1.01773	0.01342		-5.48784	1.01743	0.02423	1.0048	1.0048		-5.48784	1.04464	0.01692	1.01045	0.02273		-5.48784	1.00514	0.02143	1.00817	0.02941		-5.48784	1.02325	0.03735	1.00581	0.03476		-5.48784	1.00114	0.02122	1.02947	0.02547
-5.33952	0.99617	0.01541	1.03091	0.01877	1.00872	0.01083		-5.33952	1.00519	0.03061	1.00306	1.00306		-5.33952	1.02325	0.01593	1.01435	0.02366		-5.33952	0.99367	0.02135	0.99781	0.02416		-5.33952	0.98642	0.04624	1.0265	0.04357		-5.33952	1.04833	0.02656	1.02468	0.02388
-5.1912	0.99958	0.01564	1.02593	0.01825	1.00111	0.01723		-5.1912	1.00546	0.03483	1.01776	1.01776		-5.1912	1.02222	0.02373	1.01669	0.0211		-5.1912	1.00346	0.02017	1.00853	0.02197		-5.1912	1.00262	0.03436	0.97403	0.02886		-5.1912	1.01065	0.01903	0.9729	0.02815
-5.04288	1.01584	0.01982	1.00873	0.02088	1.01349	0.01468		-5.04288	1.00353	0.04083	1.02309	1.02309		-5.04288	1.01525	0.02441	1.02849	0.0187		-5.04288	1.0068	0.0185	1.01937	0.0168		-5.04288	1.02088	0.0308	1.00823	0.0401		-5.04288	1.00721	0.01995	1.00287	0.02676
-4.89456	0.99925	0.02085	1.03385	0.02068	1.00457	0.01581		-4.89456	1.05239	0.05421	0.99755	0.99755		-4.89456	1.01743	0.01973	0.9925	0.02038		-4.89456	1.00092	0.02206	1.00109	0.02018		-4.89456	0.97665	0.04057	1.01944	0.02887		-4.89456	0.9953	0.02711	1.00753	0.02395
-4.74624	0.98827	0.01797	1.00226	0.01647	0.99829	0.01467		-4.74624	1.03601	0.05003	0.99855	0.99855		-4.74624	1.02659	0.017	1.0112	0.0179		-4.74624	1.02447	0.02342	0.98188	0.01993		-4.74624	0.98839	0.03662	0.97537	0.0332		-4.74624	0.99813	0.02158	1.00744	0.02507
-4.59792	1.00199	0.01305	1.02263	0.0142	0.9942	0.01499		-4.59792	1.02712	0.04411	1.02652	1.02652		-4.59792	1.03898	0.01993	0.98507	0.02105		-4.59792	1.00847	0.02565	1.00282	0.02325		-4.59792	0.99722	0.03941	1.01669	0.03474		-4.59792	0.99118	0.02096	1.02091	0.02744
-4.4496	0.9874	0.02573	1.01586	0.01721	0.99579	0.01576		-4.4496	0.99608	0.03972	0.99692	0.99692		-4.4496	1.01195	0.02254	0.99944	0.02695		-4.4496	1.00459	0.02415	0.99433	0.02323		-4.4496	1.03054	0.05182	1.03262	0.02823		-4.4496	0.98513	0.02052	1.0391	0.02682
-4.30128	0.98681	0.01937	0.99884	0.01687	0.99491	0.0133		-4.30128	1.0147	0.04458	1.01349	1.01349		-4.30128	1.02237	0.02463	1.00641	0.01371		-4.30128	0.99576	0.01915	1.00318	0.01596		-4.30128	0.96289	0.03619	0.99902	0.03078		-4.30128	0.98673	0.02289	0.99254	0.02591
-4.15296	1.01932	0.02185	0.98832	0.01481	1.00875	0.01565		-4.15296	1.02385	0.03214	1.01631	1.01631		-4.15296	0.99608	0.01717	0.98793	0.02145		-4.15296	1.01637	0.02679	1.00268	0.02131		-4.15296	1.02391	0.04596	1.01039	0.03584		-4.15296	1.00236	0.02498	0.99512	0.03412
-4.00464	1.0126	0.01805	1.01867	0.01267	1.01631	0.01677		-4.00464	1.02191	0.04049	0.98552	0.98552		-4.00464	1.01228	0.02789	1.00014	0.02372		-4.00464	0.98128	0.02234	1.02027	0.02706		-4.00464	0.99257	0.02911	0.9897	0.03283		-4.00464	0.98262	0.02289	1.01958	0.02825
-3.85632	0.99998	0.01658	1.00645	0.01754	1.00404	0.01345		-3.85632	0.99322	0.03237	0.98908	0.98908		-3.85632	0.99977	0.01959	1.00978	0.02418		-3.85632	1.01008	0.01981	0.99236	0.01673		-3.85632	0.98053	0.02862	0.97904	0.03162		-3.85632	1.00841	0.03317	1.01533	0.0279
-3.708	1.01751	0.02081	1.02026	0.01923	1.0073	0.01414		-3.708	0.99692	0.03573	0.97352	0.97352		-3.708	1.0057	0.02871	0.9907	0.02144		-3.708	1.01164	0.01728	1.00001	0.02321		-3.708	1.00875	0.0387	0.97097	0.03411		-3.708	1.00405	0.02452	1.02982	0.02881
-3.55968	1.00482	0.01748	1.01668	0.02064	1.00628	0.01325		-3.55968	0.98282	0.0482	0.97093	0.97093		-3.55968	1.02472	0.01765	0.99926	0.0239		-3.55968	0.98276	0.01834	0.97613	0.01678		-3.55968	0.99364	0.03994	1.00426	0.0319		-3.55968	0.98659	0.0285	1.01221	0.0275
-3.41136	1.00476	0.01902	1.00143	0.01691	0.99152	0.01236		-3.41136	1.063	0.02487	0.98721	0.98721		-3.41136	0.9947	0.02677	1.01112	0.01852		-3.41136	0.99321	0.01928	0.99535	0.0197		-3.41136	1.00723	0.03367	1.01	0.03723		-3.41136	0.99689	0.02672	1.01254	0.02727
-3.26304	1.00882	0.02273	0.99253	0.0168	0.99958	0.01613		-3.26304	0.97871	0.04757	1.00607	1.00607		-3.26304	1.00881	0.01986	1.01673	0.02201		-3.26304	0.98665	0.01728	0.99797	0.0205		-3.26304	0.98037	0.03401	0.94966	0.03756		-3.26304	0.99379	0.02204	0.99798	0.02894
-3.11472	0.97715	0.01984	1.01349	0.02082	0.9887	0.01569		-3.11472	0.98653	0.04971	0.99779	0.99779		-3.11472	0.99939	0.02401	0.99298	0.02153		-3.11472	1.00641	0.0216	0.99418	0.02666		-3.11472	1.00644	0.03406	1.02453	0.04793		-3.11472	0.98449	0.02305	0.98939	0.026
-2.9664	0.99072	0.01823	1.02075	0.01651	0.99404	0.01497		-2.9664	1.00289	0.04355	0.96747	0.96747		-2.9664	1.02126	0.01787	0.98713	0.02051		-2.9664	1.02102	0.02182	0.99302	0.0221		-2.9664	0.98864	0.03349	0.99304	0.0326		-2.9664	0.99342	0.01846	1.02176	0.02919
-2.81808	0.99828	0.02129	1.00033	0.01946	0.97392	0.01859		-2.81808	1.01683	0.02641	0.99712	0.99712		-2.81808	1.00949	0.02203	0.98013	0.01842		-2.81808	1.01578	0.01964	1.00114	0.01763		-2.81808	0.95878	0.0366	1.01137	0.02852		-2.81808	0.97442	0.02247	0.97792	0.02481
-2.66976	0.99292	0.01835	0.99411	0.01657	1.00003	0.01516		-2.66976	0.97377	0.04572	0.97992	0.97992		-2.66976	1.03695	0.02335	0.96956	0.0253		-2.66976	0.9968	0.02094	1.02735	0.0207		-2.66976	0.9673	0.03409	1.00563	0.02588		-2.66976	1.00712	0.0223	1.01647	0.02671
-2.52144	0.98537	0.02188	1.00688	0.01727	0.98045	0.01744		-2.52144	1.03213	0.03847	0.98794	0.98794		-2.52144	1.00556	0.02354	0.98088	0.02288		-2.52144	0.99178	0.02041	0.9918	0.02569		-2.52144	0.99377	0.02571	1.02844	0.045		-2.52144	1.01075	0.02363	1.01135	0.02669
-2.37312	0.98314	0.01758	0.99371	0.01925	0.99043	0.01471		-2.37312	1.02096	0.03669	0.99905	0.99905		-2.37312	0.99595	0.02234	0.98427	0.01979		-2.37312	0.99224	0.01748	0.99947	0.02418		-2.37312	0.99153	0.03923	0.99727	0.03329		-2.37312	0.95772	0.02787	1.00834	0.0247
-2.2248	1.00662	0.01984	0.99399	0.02076	0.99195	0.01427		-2.2248	1.05831	0.04969	0.97505	0.97505		-2.2248	1.00996	0.02215	0.98067	0.02543		-2.2248	0.99334	0.01504	0.97805	0.01982		-2.2248	1.01788	0.03768	1.01007	0.03323		-2.2248	0.98073	0.02744	0.98088	0.02504
-2.07648	0.97923	0.019	1.00672	0.02067	0.99296	0.01466		-2.07648	0.99165	0.03587	0.98997	0.98997		-2.07648	0.98961	0.02269	1.00585	0.01639		-2.07648	0.99741	0.02148	0.97955	0.0255		-2.07648	0.98689	0.03285	0.99615	0.03511		-2.07648	1.00257	0.02193	0.99329	0.02823
-1.92816	0.97805	0.01967	0.99897	0.01955	0.98805	0.01311		-1.92816	0.99278	0.03055	0.98578	0.98578		-1.92816	1.0004	0.01967	0.99072	0.01715		-1.92816	0.98389	0.02142	0.98394	0.02529		-1.92816	0.96417	0.04501	0.9716	0.03948		-1.92816	0.98817	0.02227	1.00799	0.02184
-1.77984	0.97522	0.02049	1.00354	0.02154	0.98204	0.01573		-1.77984	1.01257	0.03163	0.96367	0.96367		-1.77984	1.01018	0.0254	1.01102	0.02482		-1.77984	0.99374	0.02088	1.00165	0.02809		-1.77984	1.02129	0.03289	0.99399	0.03801		-1.77984	0.98203	0.02552	1.00568	0.02209
-1.63152	0.98084	0.01793	0.98581	0.0183	0.97488	0.01548		-1.63152	1.00062	0.03603	1.00055	1.00055		-1.63152	1.02239	0.02408	0.97952	0.02462		-1.63152	1.02047	0.03454	0.99126	0.02884		-1.63152	0.99374	0.03097	0.97156	0.03551		-1.63152	0.99155	0.02506	1.00631	0.02255
-1.4832	0.98764	0.02141	1.00174	0.01971	0.9762	0.01771		-1.4832	1.00852	0.04902	0.97847	0.97847		-1.4832	1.00001	0.02029	0.98439	0.02672		-1.4832	0.98927	0.02022	0.99739	0.03218		-1.4832	0.98662	0.03773	1.00499	0.03004		-1.4832	0.97471	0.02386	1.00717	0.02356
-1.33488	0.99984	0.02587	1.01062	0.02043	0.98583	0.01472		-1.33488	0.96171	0.04861	0.97845	0.97845		-1.33488	1.00264	0.02388	0.9795	0.01851		-1.33488	0.99531	0.02215	0.99818	0.02142		-1.33488	0.99124	0.03283	0.99547	0.04119		-1.33488	0.99475	0.02597	0.98666	0.02531
-1.18656	0.98136	0.02022	1.00532	0.0182	0.97198	0.02001		-1.18656	1.01296	0.03315	0.93757	0.93757		-1.18656	0.99451	0.02703	0.98769	0.02703		-1.18656	0.99815	0.01976	0.98342	0.02248		-1.18656	0.98088	0.04034	0.99004	0.02794		-1.18656	0.99301	0.02429	0.98418	0.02414
-1.03824	0.98924	0.01917	0.99023	0.01844	0.97877	0.01881		-1.03824	1.00576	0.05294	0.99642	0.99642		-1.03824	0.99346	0.02075	0.97987	0.02203		-1.03824	0.98664	0.02046	1.00759	0.02082		-1.03824	0.96913	0.04127	0.9796	0.03518		-1.03824	0.96018	0.02272	0.99997	0.02327
-0.88992	0.9857	0.01686	1.0115	0.01931	0.97763	0.01402		-0.88992	0.96573	0.04158	0.99695	0.99695		-0.88992	1.00145	0.0313	0.96281	0.03512		-0.88992	0.98921	0.02052	0.99112	0.02631		-0.88992	0.95812	0.0279	0.95919	0.04623		-0.88992	0.99967	0.02313	0.99509	0.02064
-0.7416	0.98956	0.02162	1.00808	0.02062	0.98206	0.02057		-0.7416	0.9782	0.03713	0.99695	0.99695		-0.7416	0.98972	0.02199	0.97423	0.02477		-0.7416	1.00774	0.02738	0.99899	0.02084		-0.7416	0.99018	0.03968	0.97264	0.05524		-0.7416	0.98168	0.01989	1.00323	0.02641
-0.59328	0.98924	0.01645	1.00161	0.02191	0.98355	0.01837		-0.59328	1.01742	0.0394	1.0017	1.0017		-0.59328	0.96856	0.02265	0.96605	0.03176		-0.59328	0.97873	0.02198	0.99959	0.02155		-0.59328	0.9594	0.03416	0.97598	0.03276		-0.59328	0.9613	0.02951	0.99712	0.02535
-0.44496	0.9808	0.02214	0.98173	0.0185	0.98134	0.01814		-0.44496	0.98279	0.0481	0.94642	0.94642		-0.44496	0.98017	0.02683	0.97701	0.02447		-0.44496	0.99112	0.02174	0.99094	0.02295		-0.44496	0.95521	0.04067	1.00372	0.03734		-0.44496	0.98347	0.02301	1.00902	0.02383
-0.29664	0.9906	0.01644	1.01034	0.01807	0.97746	0.01674		-0.29664	0.96441	0.03479	0.95257	0.95257		-0.29664	0.96762	0.02781	0.9609	0.03641		-0.29664	0.98266	0.01914	0.99476	0.02027		-0.29664	0.95899	0.03533	0.98517	0.03817		-0.29664	0.9813	0.02563	0.98761	0.01877
--	0.76786	0.19289	2.11749	1.941	0.88631	0.84299		--	--	--	--	--		--	0.63094	0.19342	1.0513	0.26892		--	3.21858	3.99169	-3.93205	7.49248		--	0.5373	0.847	0.8117	0.22666		--	1.28004	0.85159	10.6224	17.8035
--	--	--	--	--	--	--		0	0	0	0	0		0	0	0	0	0		0	0	0	0	0		0	0	0	0	0		0	0	0	0	0
0	0	0	0	0	0	0		--	--	--	--	--		--	--	--	--	--		0.14832	0.04331	0.01834	0.04896	0.02642		0.14832	0.12311	0.04859	0.1305	0.0441		0.14832	0.06953	0.02556	0.09931	0.0258
0.14832	0.07593	0.02056	0.06832	0.0196	0.08169	0.01821		--	0.06002	--	0.10587	0.10587		0.14832	0.07272	0.02407	0.07891	0.02957		0.29664	0.08971	0.02569	0.10635	0.03318		0.29664	0.17218	0.04773	0.20496	0.03791		0.29664	0.11726	0.03057	0.13481	0.02397
0.29664	0.12276	0.02352	0.14405	0.02346	0.12694	0.02315		0.14832	0.10209	0.03515	0.17183	0.17183		0.29664	0.09899	0.0308	0.12085	0.02913		0.44496	0.12559	0.02483	0.15616	0.02018		0.44496	0.17616	0.05165	0.22014	0.05012		0.44496	0.1557	0.02524	0.19567	0.02419
0.44496	0.15202	0.02395	0.16301	0.02121	0.17003	0.02426		0.29664	0.14435	0.04604	0.21111	0.21111		0.44496	0.13878	0.02645	0.16603	0.02631		0.59328	0.13802	0.0235	0.19188	0.02578		0.59328	0.25691	0.04395	0.24074	0.03963		0.59328	0.19252	0.02699	0.23594	0.03313
0.59328	0.17727	0.02283	0.20294	0.02662	0.2004	0.02474		0.44496	0.21757	0.04114	0.22575	0.22575		0.59328	0.15996	0.02848	0.17128	0.02796		0.7416	0.16416	0.02549	0.20686	0.02623		0.7416	0.28691	0.049	0.28524	0.04623		0.7416	0.23323	0.0307	0.25763	0.03163
0.7416	0.19691	0.02529	0.23709	0.02379	0.22639	0.02747		0.59328	0.23469	0.04484	0.27265	0.27265		0.7416	0.18513	0.03167	0.21118	0.03662		0.88992	0.21315	0.03215	0.21313	0.02894		0.88992	0.31499	0.0482	0.33456	0.05032		0.88992	0.25482	0.03329	0.29538	0.03226
0.88992	0.22904	0.02698	0.2627	0.02499	0.24908	0.02719		0.7416	0.23541	0.06078	0.29781	0.29781		0.88992	0.19882	0.03192	0.24681	0.02965		1.03824	0.21651	0.0278	0.23836	0.03278		1.03824	0.32162	0.05274	0.34784	0.04227		1.03824	0.28599	0.03027	0.30298	0.0286
1.03824	0.25723	0.02914	0.29004	0.02819	0.26019	0.02415		0.88992	0.28835	0.03796	0.32105	0.32105		1.03824	0.22871	0.03536	0.28749	0.04145		1.18656	0.23352	0.02438	0.27545	0.02936		1.18656	0.36733	0.05385	0.38445	0.05175		1.18656	0.29057	0.03524	0.34833	0.03597
1.18656	0.25134	0.02686	0.29812	0.0273	0.28448	0.02744		1.03824	0.26967	0.04902	0.37146	0.37146		1.18656	0.24005	0.03731	0.26544	0.03518		1.33488	0.25123	0.03328	0.26318	0.03742		1.33488	0.3699	0.05016	0.39969	0.05429		1.33488	0.31118	0.03144	0.35883	0.03494
1.33488	0.29007	0.02879	0.32873	0.02608	0.281	0.02687		1.18656	0.35384	0.04649	0.35233	0.35233		1.33488	0.26704	0.03395	0.29021	0.03601		1.4832	0.278	0.02919	0.29031	0.03128		1.4832	0.3936	0.05553	0.44778	0.04657		1.4832	0.33297	0.04085	0.38599	0.03382
1.4832	0.31058	0.03065	0.35553	0.02627	0.30969	0.02961		1.33488	0.33918	0.05371	0.3723	0.3723		1.4832	0.26655	0.03238	0.30748	0.03545		1.63152	0.29704	0.03893	0.32256	0.0321		1.63152	0.40479	0.06186	0.43827	0.04718		1.63152	0.34238	0.03395	0.38721	0.03036
1.63152	0.3144	0.03332	0.39309	0.03202	0.31854	0.02998		1.4832	0.35692	0.04841	0.41614	0.41614		1.63152	0.27551	0.03395	0.31845	0.03822		1.77984	0.29741	0.03004	0.33153	0.03503		1.77984	0.43477	0.05889	0.47088	0.04569		1.77984	0.33885	0.03741	0.38579	0.02609
1.77984	0.32196	0.03164	0.36865	0.02887	0.33251	0.03274		1.63152	0.34483	0.0505	0.398	0.398		1.77984	0.29407	0.03574	0.33785	0.03887		1.92816	0.30617	0.03212	0.33851	0.04039		1.92816	0.44607	0.05759	0.45289	0.05211		1.92816	0.36755	0.04008	0.42373	0.03398
1.92816	0.3373	0.03156	0.39007	0.02636	0.33852	0.02844		1.77984	0.3685	0.05834	0.4299	0.4299		1.92816	0.29266	0.03681	0.36531	0.04116		2.07648	0.32215	0.03449	0.3467	0.03059		2.07648	0.44222	0.05495	0.48237	0.06824		2.07648	0.37322	0.03951	0.43453	0.03904
2.07648	0.33474	0.02944	0.40253	0.03124	0.35839	0.031		1.92816	0.33001	0.04596	0.43914	0.43914		2.07648	0.31828	0.03399	0.37482	0.04271		2.2248	0.33155	0.03796	0.37281	0.03308		2.2248	0.44759	0.0516	0.50311	0.04849		2.2248	0.36777	0.03119	0.43621	0.03481
2.2248	0.34681	0.03273	0.42005	0.03151	0.36047	0.03052		2.07648	0.40174	0.05124	0.44689	0.44689		2.2248	0.34234	0.04465	0.36574	0.03873		2.37312	0.32716	0.03328	0.38215	0.0359		2.37312	0.46521	0.06174	0.46951	0.0524		2.37312	0.40058	0.03768	0.44672	0.03964
2.37312	0.3634	0.03287	0.4252	0.02737	0.37399	0.03182		2.2248	0.37881	0.0568	0.46975	0.46975		2.37312	0.32568	0.03933	0.40355	0.041		2.52144	0.34632	0.03175	0.38211	0.03854		2.52144	0.48954	0.05556	0.50088	0.05355		2.52144	0.37567	0.03705	0.45275	0.03423
2.52144	0.36465	0.02664	0.43758	0.03218	0.37172	0.03081		2.37312	0.38854	0.05692	0.46013	0.46013		2.52144	0.33682	0.03341	0.4007	0.04115		2.66976	0.361	0.03601	0.38294	0.03569		2.66976	0.47801	0.04872	0.49375	0.05533		2.66976	0.40754	0.04142	0.46688	0.03723
2.66976	0.37543	0.03296	0.45846	0.03057	0.3869	0.03446		2.52144	0.38535	0.04296	0.50383	0.50383		2.66976	0.34268	0.03662	0.38973	0.03877		2.81808	0.35996	0.03232	0.38393	0.03747		2.81808	0.46612	0.05293	0.49767	0.0618		2.81808	0.40179	0.03922	0.49527	0.03538
2.81808	0.39697	0.03326	0.4461	0.02555	0.39936	0.03638		2.66976	0.44501	0.05965	0.53125	0.53125		2.81808	0.35054	0.0356	0.42902	0.04548		2.9664	0.3811	0.04042	0.41244	0.04411		2.9664	0.47402	0.06553	0.5139	0.06547		2.9664	0.42361	0.03603	0.49381	0.04001
2.9664	0.39301	0.03492	0.45032	0.02984	0.39642	0.03412		2.81808	0.42383	0.0541	0.50418	0.50418		2.9664	0.35994	0.03517	0.40334	0.04356		3.11472	0.38151	0.03835	0.41146	0.03798		3.11472	0.48769	0.05496	0.54657	0.04226		3.11472	0.41157	0.03602	0.52145	0.03898
3.11472	0.39195	0.0337	0.4682	0.03077	0.39749	0.031		2.9664	0.44291	0.04177	0.50651	0.50651		3.11472	0.35236	0.04088	0.42751	0.04418		3.26304	0.39763	0.03372	0.40734	0.03687		3.26304	0.51604	0.04977	0.53674	0.04389		3.26304	0.41636	0.03947	0.52809	0.04629
3.26304	0.39171	0.03635	0.47414	0.03084	0.41352	0.03303		3.11472	0.41276	0.06199	0.51957	0.51957		3.26304	0.36642	0.03629	0.4345	0.03987		3.41136	0.37509	0.03774	0.43879	0.04576		3.41136	0.50372	0.05492	0.57129	0.04864		3.41136	0.4398	0.04242	0.5059	0.0352
3.41136	0.42095	0.03397	0.49038	0.02924	0.40798	0.03321		3.26304	0.42347	0.05266	0.49929	0.49929		3.41136	0.38305	0.04431	0.42403	0.04034		3.55968	0.3919	0.03473	0.4163	0.0393		3.55968	0.51361	0.04332	0.533	0.06149		3.55968	0.43269	0.03849	0.5293	0.0342
3.55968	0.41229	0.0353	0.48232	0.0276	0.41666	0.02936		3.41136	0.46287	0.05576	0.50203	0.50203		3.55968	0.39587	0.04377	0.44537	0.04174		3.708	0.37926	0.03599	0.43708	0.03873		3.708	0.49372	0.0603	0.55034	0.0464		3.708	0.42836	0.0394	0.52266	0.03363
3.708	0.42561	0.03325	0.4995	0.03401	0.42194	0.03231		3.55968	0.42706	0.05983	0.49865	0.49865		3.708	0.39317	0.04202	0.47943	0.04212		3.85632	0.39573	0.03749	0.4358	0.04375		3.85632	0.49527	0.04985	0.54615	0.04776		3.85632	0.44302	0.04758	0.49989	0.03543
3.85632	0.43714	0.03562	0.48777	0.03253	0.42498	0.03219		3.708	0.46232	0.04658	0.54811	0.54811		3.85632	0.39768	0.04488	0.44041	0.04212		4.00464	0.41679	0.04464	0.43479	0.03932		4.00464	0.49689	0.04901	0.57985	0.04964		4.00464	0.45524	0.0393	0.55831	0.04966
4.00464	0.43407	0.03134	0.50434	0.03459	0.43592	0.03534		3.85632	0.48434	0.05098	0.53603	0.53603		4.00464	0.42588	0.05024	0.47861	0.04613		4.15296	0.4087	0.03749	0.44205	0.04581		4.15296	0.5317	0.0551	0.55933	0.05565		4.15296	0.46012	0.03968	0.54646	0.032
4.15296	0.43897	0.03402	0.5062	0.03409	0.43364	0.03086		4.00464	0.45655	0.05217	0.56106	0.56106		4.15296	0.42268	0.04324	0.48043	0.04486		4.30128	0.42007	0.0431	0.45286	0.03989		4.30128	0.5183	0.05377	0.54252	0.05633		4.30128	0.44899	0.03537	0.54227	0.03975
4.30128	0.44318	0.03159	0.50185	0.03305	0.45183	0.03368		4.15296	0.53837	0.0459	0.54093	0.54093		4.30128	0.40923	0.03422	0.45909	0.04191		4.4496	0.42127	0.03719	0.45451	0.04163		4.4496	0.51557	0.06826	0.55396	0.05658		4.4496	0.46172	0.03982	0.54371	0.03637
4.4496	0.43761	0.03263	0.51795	0.0331	0.44778	0.03182		4.30128	0.48734	0.05053	0.53136	0.53136		4.4496	0.43025	0.04279	0.47228	0.04737		4.59792	0.42807	0.04286	0.46102	0.04838		4.59792	0.52561	0.04877	0.58267	0.05597		4.59792	0.45075	0.0423	0.55208	0.04012
4.59792	0.45504	0.03872	0.50378	0.03377	0.46293	0.03454		4.4496	0.46948	0.05834	0.56965	0.56965		4.59792	0.43546	0.04302	0.47816	0.04396		4.74624	0.42064	0.04262	0.46109	0.0368		4.74624	0.53845	0.05233	0.54952	0.05336		4.74624	0.46751	0.04494	0.58201	0.04651
4.74624	0.45127	0.03405	0.51881	0.03036	0.4596	0.03133		4.59792	0.53672	0.06687	0.56776	0.56776		4.74624	0.43341	0.04651	0.48747	0.04308		4.89456	0.43623	0.03736	0.46323	0.04653		4.89456	0.54301	0.05705	0.58846	0.0588		4.89456	0.47009	0.0448	0.55753	0.03707
4.89456	0.45752	0.03231	0.52133	0.03107	0.44119	0.03331		4.74624	0.49838	0.05522	0.55267	0.55267		4.89456	0.43553	0.04833	0.50175	0.04579		5.04288	0.43444	0.03598	0.46555	0.0448		5.04288	0.52589	0.06263	0.57616	0.06324		5.04288	0.45844	0.0363	0.60024	0.04394
5.04288	0.46235	0.03821	0.51989	0.03175	0.45411	0.03302		4.89456	0.52174	0.06285	0.56522	0.56522		5.04288	0.43614	0.04518	0.48321	0.04568		5.1912	0.45989	0.03705	0.4864	0.05627		5.1912	0.56295	0.05402	0.5767	0.05382		5.1912	0.48424	0.04762	0.56421	0.04191
5.1912	0.46923	0.03591	0.53361	0.0344	0.45599	0.03087		5.04288	0.49212	0.06068	0.54258	0.54258		5.1912	0.44509	0.03601	0.50018	0.04877		5.33952	0.46576	0.04729	0.48967	0.0435		5.33952	0.53336	0.04574	0.59042	0.04873		5.33952	0.48512	0.04538	0.58223	0.04103
5.33952	0.47306	0.03301	0.5205	0.03285	0.4774	0.03438		5.1912	0.51009	0.04917	0.59869	0.59869		5.33952	0.4498	0.04173	0.5006	0.04213		5.48784	0.44264	0.04044	0.48032	0.05043		5.48784	0.5356	0.05039	0.57587	0.05925		5.48784	0.4722	0.03955	0.60535	0.0494
5.48784	0.46315	0.03356	0.537	0.03368	0.46681	0.03378		5.33952	0.52746	0.05954	0.57718	0.57718		5.48784	0.4638	0.04902	0.50772	0.05536		5.63616	0.43768	0.0357	0.48922	0.04097		5.63616	0.56149	0.04683	0.59839	0.06372		5.63616	0.48061	0.04075	0.57255	0.03581
5.63616	0.47243	0.03232	0.53979	0.03345	0.48441	0.03461		5.48784	0.50571	0.05806	0.56962	0.56962		5.63616	0.46787	0.04398	0.51023	0.05243		5.78448	0.46773	0.04294	0.50293	0.04689		5.78448	0.54141	0.05597	0.58387	0.06343		5.78448	0.46763	0.04063	0.57304	0.0308
5.78448	0.48473	0.03432	0.54971	0.03493	0.49136	0.03296		5.63616	0.4974	0.06186	0.58946	0.58946		5.78448	0.46437	0.05652	0.49524	0.04295		5.9328	0.46153	0.03942	0.49592	0.04752		5.9328	0.56614	0.0575	0.56148	0.06531		5.9328	0.48736	0.04448	0.57458	0.03561
5.9328	0.47556	0.03536	0.55501	0.03298	0.47636	0.03093		5.78448	0.55264	0.06288	0.61552	0.61552		5.9328	0.4586	0.04397	0.51105	0.04497		6.08112	0.44455	0.03502	0.50016	0.05123		6.08112	0.59088	0.06281	0.57653	0.0561		6.08112	0.46922	0.04634	0.59202	0.04077
6.08112	0.47302	0.03826	0.56474	0.0338	0.4778	0.03252		5.9328	0.49979	0.05206	0.58292	0.58292		6.08112	0.47502	0.04392	0.50501	0.04389		6.22944	0.429	0.04242	0.49645	0.04253		6.22944	0.55555	0.04403	0.58808	0.06905		6.22944	0.48788	0.03946	0.59444	0.04342
6.22944	0.47196	0.03491	0.56076	0.03351	0.47692	0.03098		6.08112	0.53208	0.07116	0.57935	0.57935		6.22944	0.46621	0.04034	0.50695	0.04415		6.37776	0.45299	0.04033	0.50817	0.04572		6.37776	0.57362	0.05147	0.56284	0.05216		6.37776	0.50499	0.04656	0.59246	0.0431
6.37776	0.49755	0.03471	0.55609	0.04057	0.49704	0.03462		6.22944	0.49341	0.05406	0.5914	0.5914		6.37776	0.45265	0.04381	0.52155	0.04906		6.52608	0.4689	0.04036	0.50066	0.046		6.52608	0.56969	0.04811	0.58882	0.05255		6.52608	0.51648	0.04915	0.60729	0.03945
6.52608	0.48974	0.03728	0.55637	0.03174	0.48473	0.0348		6.37776	0.55042	0.05616	0.63797	0.63797		6.52608	0.46423	0.04218	0.52293	0.04981		6.6744	0.45526	0.03945	0.51395	0.05275		6.6744	0.58473	0.06286	0.60517	0.05527		6.6744	0.48908	0.04521	0.58046	0.03783
6.6744	0.48801	0.03547	0.55644	0.03062	0.49795	0.03057		6.52608	0.53539	0.05582	0.60067	0.60067		6.6744	0.48006	0.04756	0.51416	0.04959		6.82272	0.45683	0.04158	0.51774	0.04513		6.82272	0.55366	0.06284	0.57642	0.06056		6.82272	0.48313	0.05044	0.60765	0.03826
6.82272	0.48561	0.03772	0.57111	0.03366	0.50201	0.03457		6.6744	0.51779	0.05528	0.58986	0.58986		6.82272	0.49042	0.04767	0.52832	0.04835		6.97104	0.46593	0.0412	0.50546	0.04342		6.97104	0.54589	0.05718	0.59304	0.05446		6.97104	0.47876	0.04491	0.61025	0.03997
6.97104	0.48471	0.03689	0.56419	0.03158	0.50018	0.03438		6.82272	0.54962	0.06643	0.62309	0.62309		6.97104	0.48419	0.05159	0.52567	0.04298		7.11936	0.46373	0.03786	0.50518	0.04835		7.11936	0.58046	0.05876	0.61055	0.06324		7.11936	0.51058	0.04374	0.61004	0.04014
7.11936	0.49663	0.03497	0.55091	0.03443	0.51121	0.0357		6.97104	0.49704	0.05751	0.59634	0.59634		7.11936	0.49145	0.04542	0.52889	0.04807		7.26768	0.46861	0.04508	0.51629	0.04639		7.26768	0.55859	0.06022	0.57246	0.05272		7.26768	0.52227	0.04374	0.59177	0.03288
7.26768	0.50066	0.03739	0.55907	0.03414	0.50094	0.03462		7.11936	0.53497	0.0596	0.57568	0.57568		7.26768	0.48248	0.05551	0.54949	0.04831		7.416	0.46492	0.0435	0.50295	0.04185		7.416	0.56868	0.05684	0.60321	0.05761		7.416	0.51844	0.04538	0.6384	0.04114
7.416	0.50915	0.03776	0.5725	0.03173	0.51537	0.03764		7.26768	0.59478	0.05089	0.60547	0.60547		7.416	0.49159	0.04472	0.54325	0.05022		7.56432	0.46967	0.04204	0.48989	0.04093		7.56432	0.59174	0.0629	0.57435	0.05312		7.56432	0.49993	0.04456	0.60027	0.03271
7.56432	0.49383	0.03528	0.59013	0.03366	0.50779	0.03536		7.416	0.54098	0.0559	0.59711	0.59711		7.56432	0.48967	0.05137	0.52684	0.04948		7.71264	0.44929	0.03849	0.48971	0.04605		7.71264	0.57635	0.06737	0.62758	0.06651		7.71264	0.52196	0.05301	0.59486	0.04421
7.71264	0.50949	0.03627	0.57956	0.03471	0.53061	0.03541		7.56432	0.54214	0.06635	0.64686	0.64686		7.71264	0.47216	0.04714	0.53784	0.05253		7.86096	0.49086	0.04495	0.52355	0.04815		7.86096	0.55514	0.05756	0.60969	0.04861		7.86096	0.5159	0.04862	0.60908	0.04374
7.86096	0.5113	0.03796	0.57781	0.03318	0.51882	0.03345		7.71264	0.52723	0.05053	0.64223	0.64223		7.86096	0.47849	0.04527	0.54018	0.04757		8.00928	0.46996	0.04304	0.50055	0.04372		8.00928	0.56359	0.06071	0.5861	0.06043		8.00928	0.5162	0.03743	0.62089	0.03497
8.00928	0.5207	0.03587	0.58806	0.0341	0.52204	0.03398		7.86096	0.5507	0.05626	0.60343	0.60343		8.00928	0.51299	0.04544	0.56095	0.0494		8.1576	0.47884	0.04321	0.50115	0.04749		8.1576	0.53623	0.05902	0.60308	0.05323		8.1576	0.51038	0.0423	0.61706	0.03933
8.1576	0.49658	0.03524	0.57505	0.03435	0.51944	0.03468		8.00928	0.55276	0.05288	0.63057	0.63057		8.1576	0.48404	0.03918	0.55529	0.05617		8.30592	0.46314	0.04544	0.5113	0.04658		8.30592	0.55668	0.04998	0.59752	0.07124		8.30592	0.52302	0.04611	0.60699	0.04091
8.30592	0.49721	0.03696	0.58978	0.03529	0.53251	0.03873		8.1576	0.54847	0.05254	0.58318	0.58318		8.30592	0.5095	0.04805	0.56568	0.05644		8.45424	0.44255	0.03933	0.51961	0.04763		8.45424	0.57785	0.06067	0.56186	0.05232		8.45424	0.50859	0.04682	0.60287	0.04196
8.45424	0.51877	0.04027	0.59868	0.03924	0.52915	0.03762		8.30592	0.56981	0.06254	0.5928	0.5928		8.45424	0.50928	0.04949	0.55462	0.04888		8.60256	0.45702	0.042	0.51372	0.04274		8.60256	0.55939	0.05781	0.58102	0.05784		8.60256	0.52421	0.05299	0.65088	0.04278
8.60256	0.50932	0.03811	0.5969	0.03582	0.5237	0.03481		8.45424	0.55991	0.05531	0.6223	0.6223		8.60256	0.51625	0.046	0.55547	0.05333		8.75088	0.46418	0.04171	0.54204	0.05199		8.75088	0.57698	0.05849	0.55482	0.06		8.75088	0.5377	0.05086	0.61795	0.03988
8.75088	0.52773	0.03563	0.59085	0.03683	0.52634	0.03262		8.60256	0.55795	0.05153	0.63128	0.63128		8.75088	0.50625	0.04851	0.57622	0.04862		8.8992	0.4734	0.04155	0.53797	0.05177		8.8992	0.57046	0.0433	0.61785	0.05736		8.8992	0.53185	0.04692	0.6479	0.04519
8.8992	0.51583	0.03695	0.59846	0.03507	0.51895	0.03377		8.75088	0.5872	0.05395	0.60163	0.60163		8.8992	0.5266	0.04587	0.57072	0.05223		9.04752	0.48389	0.04259	0.55214	0.04995		9.04752	0.5649	0.0624	0.59757	0.05376		9.04752	0.5199	0.0478	0.64197	0.04426
9.04752	0.50913	0.03834	0.59768	0.03733	0.52686	0.03375		8.8992	0.60255	0.06052	0.5903	0.5903		9.04752	0.52065	0.05309	0.55748	0.05361		9.19584	0.47259	0.04149	0.53813	0.0417		9.19584	0.57282	0.06734	0.58678	0.05918		9.19584	0.52798	0.04797	0.63213	0.04572
9.19584	0.50959	0.03683	0.58438	0.03794	0.51663	0.03516		9.04752	0.53374	0.06431	0.6536	0.6536		9.19584	0.51441	0.04534	0.58931	0.05382		9.34416	0.48337	0.04261	0.52661	0.04295		9.34416	0.56822	0.05777	0.58223	0.05733		9.34416	0.52438	0.04522	0.62652	0.0407
9.34416	0.51342	0.03686	0.59725	0.03371	0.53315	0.03553		9.19584	0.57395	0.05792	0.63138	0.63138		9.34416	0.51882	0.05383	0.58249	0.05793		9.49248	0.4876	0.04491	0.5416	0.04493		9.49248	0.57131	0.06145	0.62037	0.06243		9.49248	0.53003	0.05263	0.64289	0.03819
9.49248	0.52917	0.03439	0.60672	0.03413	0.52301	0.03674		9.34416	0.58475	0.04245	0.6033	0.6033		9.49248	0.52015	0.04821	0.58114	0.05034		9.6408	0.48058	0.04171	0.53282	0.04752		9.6408	0.5883	0.07586	0.58543	0.0514		9.6408	0.52772	0.04557	0.63055	0.03769
9.6408	0.5291	0.03748	0.60247	0.03525	0.53402	0.03726		9.49248	0.52938	0.06114	0.59098	0.59098		9.6408	0.50196	0.04581	0.56273	0.05327		9.78912	0.50933	0.04754	0.53202	0.0469		9.78912	0.59115	0.07677	0.58925	0.06103		9.78912	0.54984	0.04523	0.62635	0.03813
9.78912	0.51599	0.03993	0.58993	0.03723	0.53065	0.0357		9.6408	0.56074	0.04858	0.63134	0.63134		9.78912	0.5249	0.04879	0.56094	0.05398		9.93744	0.47707	0.04438	0.53743	0.05615		9.93744	0.58129	0.07556	0.61039	0.05511		9.93744	0.55219	0.05795	0.62	0.03813
9.93744	0.5329	0.03633	0.62094	0.03592	0.53598	0.0355		9.78912	0.58625	0.07046	0.62054	0.62054		9.93744	0.51839	0.04687	0.57582	0.05147		10.0858	0.48775	0.04481	0.53343	0.04883		10.0858	0.58634	0.0564	0.59723	0.0545		10.0858	0.51551	0.04123	0.63127	0.03882
10.0858	0.52249	0.03631	0.60128	0.03743	0.5339	0.04382		9.93744	0.53383	0.05416	0.62875	0.62875		10.0858	0.51283	0.04672	0.58166	0.06119		10.2341	0.50157	0.0448	0.52494	0.04336		10.2341	0.58094	0.07382	0.61045	0.05421		10.2341	0.5311	0.04511	0.63344	0.03652
10.2341	0.52781	0.04009	0.60399	0.03416	0.52809	0.035		10.0858	0.57336	0.05002	0.65445	0.65445		10.2341	0.52309	0.05941	0.57728	0.05996		10.3824	0.52505	0.04521	0.53597	0.04986		10.3824	0.61712	0.06521	0.61579	0.06678		10.3824	0.5337	0.04938	0.63416	0.03726
10.3824	0.50733	0.04231	0.6187	0.03663	0.54288	0.03765		10.2341	0.61698	0.05681	0.6203	0.6203		10.3824	0.54987	0.05087	0.58123	0.05144		10.5307	0.50131	0.0495	0.5567	0.05052		10.5307	0.56063	0.06247	0.59727	0.0555		10.5307	0.51035	0.05215	0.6365	0.04113
10.5307	0.524	0.04093	0.60451	0.03475	0.53297	0.03908		10.3824	0.58032	0.07137	0.62188	0.62188		10.5307	0.52644	0.04745	0.59596	0.05519		10.679	0.47899	0.04818	0.54801	0.05218		10.679	0.55564	0.07198	0.63422	0.06186		10.679	0.53354	0.04698	0.64668	0.04126
10.679	0.51996	0.04376	0.61076	0.03704	0.55303	0.03869		10.5307	0.55809	0.05043	0.66201	0.66201		10.679	0.53176	0.05603	0.58593	0.05397		10.8274	0.49073	0.04178	0.5608	0.04663		10.8274	0.60339	0.06494	0.63461	0.05499		10.8274	0.5336	0.05347	0.64018	0.04163
10.8274	0.54133	0.0383	0.6204	0.03921	0.53937	0.038		10.679	0.56672	0.05628	0.64787	0.64787		10.8274	0.51487	0.05633	0.58171	0.05658		10.9757	0.49462	0.04657	0.5496	0.04752		10.9757	0.57728	0.07248	0.59658	0.06953		10.9757	0.52712	0.04807	0.64092	0.04176
10.9757	0.52126	0.04049	0.62356	0.03659	0.53701	0.0376		10.8274	0.60504	0.07161	0.65025	0.65025		10.9757	0.52828	0.04823	0.57885	0.062		11.124	0.51354	0.04411	0.56409	0.05454		11.124	0.56782	0.05878	0.59526	0.06507		11.124	0.53315	0.04822	0.6576	0.04333
11.124	0.53586	0.03869	0.62211	0.03821	0.55403	0.03781		10.9757	0.60038	0.06795	0.6288	0.6288		11.124	0.56953	0.06261	0.58419	0.05214		11.2723	0.50099	0.04765	0.56502	0.04514		11.2723	0.57569	0.0633	0.59988	0.06016		11.2723	0.52705	0.049	0.64414	0.03783
11.2723	0.52435	0.0388	0.61141	0.03531	0.54155	0.03714		11.124	0.53436	0.0748	0.67157	0.67157		11.2723	0.53279	0.05957	0.59761	0.05855		11.4206	0.51365	0.04371	0.53692	0.04681		11.4206	0.6167	0.07471	0.61317	0.05319		11.4206	0.53971	0.0509	0.6503	0.05061
11.4206	0.52563	0.03788	0.59794	0.037	0.53859	0.03559		11.2723	0.60261	0.04623	0.66636	0.66636		11.4206	0.52624	0.0525	0.58041	0.05533		11.569	0.50127	0.04924	0.54671	0.05181		11.569	0.61212	0.07133	0.60326	0.05759		11.569	0.53283	0.04961	0.64303	0.04108
11.569	0.53525	0.04098	0.62579	0.03652	0.5573	0.04066		11.4206	0.5454	0.05284	0.66624	0.66624		11.569	0.54364	0.05514	0.58079	0.05561		11.7173	0.50242	0.04304	0.5309	0.04512		11.7173	0.58853	0.05888	0.64985	0.06427		11.7173	0.53308	0.04865	0.65079	0.03945
11.7173	0.5391	0.0408	0.61421	0.04117	0.56969	0.04299		11.569	0.58532	0.05181	0.66519	0.66519		11.7173	0.52882	0.04739	0.58347	0.05777		11.8656	0.49351	0.04223	0.55225	0.05084		11.8656	0.58251	0.06281	0.59049	0.05735		11.8656	0.52408	0.0504	0.6319	0.03599
11.8656	0.52923	0.04156	0.62227	0.03623	0.54169	0.03831		11.7173	0.62386	0.06152	0.67148	0.67148		11.8656	0.52711	0.0548	0.57872	0.05354		12.0139	0.51221	0.0437	0.54597	0.04472		12.0139	0.60657	0.07213	0.63913	0.06551		12.0139	0.55105	0.05024	0.62531	0.04084
12.0139	0.54115	0.04049	0.61938	0.03544	0.53048	0.03665		11.8656	0.57372	0.06966	0.63164	0.63164		12.0139	0.55191	0.05742	0.58594	0.05777		12.1622	0.48714	0.0464	0.53775	0.049		12.1622	0.56761	0.05087	0.59503	0.06106		12.1622	0.5625	0.05312	0.65405	0.03878
12.1622	0.53931	0.04436	0.61741	0.03764	0.55523	0.0405		12.0139	0.54925	0.05144	0.64059	0.64059		12.1622	0.54548	0.05547	0.58271	0.05268		12.3106	0.49439	0.04713	0.56375	0.04869		12.3106	0.58137	0.06241	0.60204	0.06092		12.3106	0.54231	0.05536	0.63726	0.04388
12.3106	0.53517	0.04106	0.63861	0.03745	0.54213	0.03681		12.1622	0.61459	0.06283	0.65137	0.65137		12.3106	0.52824	0.04663	0.59437	0.05794		12.4589	0.49913	0.05345	0.56121	0.04839		12.4589	0.59115	0.07034	0.59917	0.05183		12.4589	0.53256	0.04557	0.64516	0.04282
12.4589	0.5288	0.03713	0.62059	0.03566	0.55092	0.03961		12.3106	0.55713	0.06062	0.65685	0.65685		12.4589	0.5648	0.0523	0.59288	0.06131		12.6072	0.51383	0.04807	0.54121	0.04682		12.6072	0.60206	0.06018	0.59867	0.05683		12.6072	0.56441	0.05239	0.64281	0.03625
12.6072	0.54258	0.03907	0.61541	0.03807	0.54117	0.03852		12.4589	0.60076	0.06544	0.65371	0.65371		12.6072	0.53143	0.05337	0.60452	0.06254		12.7555	0.49119	0.05018	0.56619	0.0516		12.7555	0.60735	0.07091	0.59712	0.05179		12.7555	0.55577	0.05067	0.63287	0.04196
12.7555	0.54344	0.03993	0.6223	0.03465	0.55808	0.04029		12.6072	0.60658	0.06346	0.69472	0.69472		12.7555	0.54739	0.05577	0.6184	0.0574		12.9038	0.5103	0.04583	0.53268	0.049		12.9038	0.60129	0.06687	0.57193	0.06528		12.9038	0.56201	0.04934	0.63715	0.03762
12.9038	0.53746	0.03736	0.62731	0.03527	0.55574	0.04228		12.7555	0.6201	0.06099	0.65819	0.65819		12.9038	0.54073	0.04627	0.59327	0.0602		13.0522	0.50611	0.04768	0.55711	0.04693		13.0522	0.65124	0.0792	0.59484	0.05164		13.0522	0.54644	0.05369	0.67472	0.04145
13.0522	0.5446	0.03404	0.63067	0.03361	0.55174	0.04026		12.9038	0.58606	0.07131	0.65511	0.65511		13.0522	0.54117	0.05803	0.6002	0.0578		13.2005	0.50016	0.04927	0.56006	0.05558		13.2005	0.59738	0.06651	0.60965	0.0684		13.2005	0.56482	0.05577	0.63964	0.04035
13.2005	0.5573	0.03877	0.64485	0.03696	0.55312	0.03674		13.0522	0.60965	0.06645	0.61606	0.61606		13.2005	0.5693	0.05408	0.59872	0.05407		13.3488	0.51332	0.04393	0.56963	0.04585		13.3488	0.60015	0.07457	0.5836	0.06954		13.3488	0.53337	0.05191	0.67602	0.04176
13.3488	0.51617	0.03738	0.62674	0.03742	0.55339	0.03896		13.2005	0.59178	0.05776	0.67226	0.67226		13.3488	0.55389	0.04957	0.61967	0.06107		13.4971	0.49353	0.04538	0.5484	0.05249		13.4971	0.60194	0.06738	0.62724	0.06212		13.4971	0.53707	0.0495	0.63496	0.0419
13.4971	0.53131	0.04052	0.63849	0.03782	0.55833	0.03906		13.3488	0.59786	0.06522	0.65016	0.65016		13.4971	0.56617	0.06076	0.60241	0.05065		13.6454	0.50653	0.04742	0.55436	0.05176		13.6454	0.61515	0.06287	0.58825	0.06061		13.6454	0.53809	0.04503	0.64483	0.04242
13.6454	0.53347	0.03762	0.62675	0.03481	0.55184	0.03983		13.4971	0.61946	0.05973	0.66921	0.66921		13.6454	0.56756	0.04966	0.62289	0.05867		13.7938	0.50981	0.05288	0.56669	0.05277		13.7938	0.61147	0.06246	0.62026	0.05881		13.7938	0.55939	0.04744	0.67345	0.04372
13.7938	0.52441	0.03878	0.63778	0.03605	0.55558	0.03954		13.6454	0.56544	0.06961	0.62953	0.62953		13.7938	0.54476	0.05269	0.61019	0.05503		13.9421	0.50938	0.05063	0.55382	0.04999		13.9421	0.584	0.06763	0.60937	0.06799		13.9421	0.53588	0.04638	0.66228	0.03377
13.9421	0.52691	0.04116	0.63935	0.0382	0.55642	0.03846		13.7938	0.61516	0.05216	0.63447	0.63447		13.9421	0.55904	0.05171	0.61032	0.06009		14.0904	0.53629	0.04831	0.5777	0.05123		14.0904	0.60215	0.06221	0.62066	0.06034		14.0904	0.55829	0.0538	0.63494	0.03848
14.0904	0.55037	0.03851	0.63118	0.03806	0.54341	0.03978		13.9421	0.59249	0.06761	0.6398	0.6398		14.0904	0.56526	0.05771	0.58283	0.05874		14.2387	0.52097	0.05043	0.57646	0.04733		14.2387	0.59564	0.0589	0.5923	0.05571		14.2387	0.56387	0.05048	0.64689	0.037
14.2387	0.53518	0.0354	0.64657	0.03436	0.55671	0.03729		14.0904	0.59317	0.05965	0.63366	0.63366		14.2387	0.55771	0.05439	0.60612	0.05793		14.387	0.53005	0.04536	0.56227	0.05236		14.387	0.63918	0.06922	0.64211	0.05672		14.387	0.54416	0.05962	0.66905	0.0491
14.387	0.55249	0.03728	0.65511	0.03653	0.55377	0.04162		14.2387	0.59977	0.09059	0.65543	0.65543		14.387	0.5575	0.05867	0.62394	0.0654		14.5354	0.53038	0.05117	0.57622	0.04933		14.5354	0.5689	0.07641	0.57554	0.06005		14.5354	0.56526	0.04584	0.64817	0.03803
14.5354	0.53984	0.03923	0.64648	0.03662	0.56279	0.04341		14.387	0.59954	0.07392	0.64297	0.64297		14.5354	0.56098	0.05709	0.58643	0.05989		14.6837	0.51044	0.05332	0.56968	0.05067		14.6837	0.6136	0.07371	0.58751	0.06429		14.6837	0.56491	0.0487	0.67298	0.04456
14.6837	0.55353	0.03874	0.63509	0.03348	0.55918	0.03882		14.5354	0.67949	0.0699	0.68783	0.68783		14.6837	0.58143	0.04995	0.61266	0.06155		14.832	0.50851	0.04628	0.58898	0.05143		14.832	0.61182	0.0745	0.59803	0.07224		14.832	0.56156	0.05302	0.64894	0.03729
14.832	0.55172	0.03717	0.63991	0.03652	0.54673	0.04004		14.6837	0.60387	0.07675	0.65661	0.65661		14.832	0.56598	0.06036	0.60225	0.05853		14.9803	0.5019	0.05151	0.56789	0.04666		14.9803	0.57067	0.06982	0.63216	0.0691		14.9803	0.56549	0.05024	0.65165	0.04593
14.9803	0.53893	0.0392	0.64926	0.03557	0.55824	0.03806		14.832	0.64156	0.06711	0.66228	0.66228		14.9803	0.55095	0.06472	0.62127	0.05752		15.1286	0.51501	0.04848	0.59056	0.04663		15.1286	0.59925	0.07044	0.59651	0.0494		15.1286	0.56219	0.05175	0.66022	0.04527
15.1286	0.54192	0.03827	0.64699	0.03757	0.55649	0.03941		14.9803	0.61092	0.05983	0.63085	0.63085		15.1286	0.57717	0.06496	0.59865	0.05989		15.277	0.51924	0.04768	0.58412	0.04493		15.277	0.57341	0.07573	0.57202	0.07325		15.277	0.56895	0.04973	0.6589	0.03992
15.277	0.55176	0.03874	0.65742	0.03382	0.57092	0.03856		15.1286	0.56709	0.07748	0.67657	0.67657		15.277	0.57503	0.06659	0.61623	0.05414		15.4253	0.50642	0.04897	0.5668	0.0597		15.4253	0.57404	0.07198	0.62638	0.05495		15.4253	0.55583	0.04806	0.64272	0.03757
15.4253	0.53328	0.03849	0.65655	0.0385	0.54934	0.03923		15.277	0.66721	0.05517	0.69293	0.69293		15.4253	0.54723	0.0598	0.62842	0.06392		15.5736	0.5427	0.04968	0.5798	0.05381		15.5736	0.55064	0.06372	0.63533	0.06824		15.5736	0.56702	0.05582	0.66605	0.04093
15.5736	0.55364	0.03829	0.65313	0.03674	0.551	0.03907		15.4253	0.62589	0.06709	0.67472	0.67472		15.5736	0.58442	0.06003	0.60072	0.05726		15.7219	0.53028	0.0582	0.57545	0.0573		15.7219	0.57449	0.066	0.61797	0.06809		15.7219	0.55803	0.05004	0.65544	0.03991
15.7219	0.54206	0.03638	0.66784	0.03772	0.56742	0.03886		15.5736	0.67902	0.07975	0.66915	0.66915		15.7219	0.57982	0.05226	0.61606	0.06017		15.8702	0.51713	0.04987	0.59999	0.04637		15.8702	0.57232	0.06331	0.60822	0.05946		15.8702	0.57608	0.05294	0.66487	0.03938
15.8702	0.54687	0.03991	0.65311	0.03824	0.55327	0.03923		15.7219	0.58003	0.08977	0.68069	0.68069		15.8702	0.57369	0.05748	0.60356	0.06129		16.0186	0.53394	0.04944	0.55733	0.05698		16.0186	0.58821	0.06732	0.62487	0.05557		16.0186	0.58495	0.05126	0.66508	0.04015
16.0186	0.53199	0.04152	0.64043	0.034	0.55747	0.0398		15.8702	0.62149	0.05491	0.68617	0.68617		16.0186	0.56781	0.05686	0.621	0.05968		16.1669	0.50601	0.04627	0.57478	0.05297		16.1669	0.58654	0.07849	0.60357	0.06403		16.1669	0.56949	0.05687	0.65291	0.04029
16.1669	0.53331	0.04206	0.6486	0.04345	0.56937	0.04152		16.0186	0.61123	0.07454	0.6891	0.6891		16.1669	0.54375	0.04919	0.61705	0.06074		16.3152	0.50982	0.04398	0.573	0.0525		16.3152	0.58994	0.08157	0.59686	0.07014		16.3152	0.58214	0.04805	0.67005	0.04175
16.3152	0.53745	0.03755	0.65345	0.0331	0.56906	0.03615		16.1669	0.62701	0.06411	0.70486	0.70486		16.3152	0.58142	0.05269	0.6184	0.05667		16.4635	0.52197	0.04941	0.58746	0.05326		16.4635	0.59461	0.06183	0.62256	0.06584		16.4635	0.57178	0.05197	0.64257	0.04809
16.4635	0.54761	0.03992	0.64075	0.03347	0.56026	0.04202		16.3152	0.63464	0.06937	0.69425	0.69425		16.4635	0.57476	0.05753	0.61034	0.05827		16.6118	0.52329	0.05471	0.59731	0.0497		16.6118	0.56583	0.07358	0.65107	0.05361		16.6118	0.5823	0.04484	0.67062	0.04335
16.6118	0.54824	0.0379	0.64249	0.03629	0.55856	0.03919		16.4635	0.61379	0.07053	0.68551	0.68551		16.6118	0.55611	0.05719	0.60592	0.06363		16.7602	0.54459	0.05321	0.597	0.0518		16.7602	0.5683	0.06664	0.61807	0.05917		16.7602	0.57572	0.05852	0.66686	0.04121
16.7602	0.5435	0.04022	0.64702	0.03809	0.55523	0.0394		16.6118	0.58941	0.05706	0.68037	0.68037		16.7602	0.56513	0.04835	0.61677	0.05963		16.9085	0.53871	0.04979	0.60183	0.05621		16.9085	0.61026	0.07843	0.60059	0.0593		16.9085	0.56061	0.04715	0.67475	0.04252
16.9085	0.55059	0.03687	0.65518	0.03626	0.567	0.03633		16.7602	0.60518	0.07383	0.67911	0.67911		16.9085	0.54784	0.05009	0.59843	0.05802		17.0568	0.50897	0.04497	0.58308	0.05076		17.0568	0.61665	0.06473	0.58096	0.0557		17.0568	0.58395	0.04734	0.65972	0.0398
17.0568	0.53874	0.03946	0.65212	0.03602	0.54536	0.04024		16.9085	0.5984	0.06716	0.72323	0.72323		17.0568	0.58135	0.05398	0.6025	0.0627		17.2051	0.53017	0.05345	0.58875	0.05149		17.2051	0.59956	0.07127	0.57482	0.06278		17.2051	0.57688	0.05072	0.68393	0.04918
17.2051	0.55003	0.03595	0.65578	0.03462	0.5535	0.03638		17.0568	0.60934	0.07146	0.69742	0.69742		17.2051	0.5436	0.05617	0.61451	0.058		17.3534	0.52987	0.05047	0.56839	0.05136		17.3534	0.62256	0.06642	0.57807	0.07148		17.3534	0.58232	0.04707	0.65534	0.04912
17.3534	0.52957	0.03993	0.67144	0.03821	0.55909	0.03912		17.2051	0.61705	0.064	0.66787	0.66787		17.3534	0.55575	0.06132	0.6144	0.06058		17.5018	0.51716	0.04746	0.60102	0.05045		17.5018	0.62225	0.07636	0.58246	0.05888		17.5018	0.58521	0.04935	0.65368	0.04316
17.5018	0.53881	0.04093	0.63995	0.03337	0.56319	0.04095		17.3534	0.62237	0.07929	0.70532	0.70532		17.5018	0.5777	0.05202	0.61568	0.06407		17.6501	0.5383	0.05026	0.58638	0.05573		17.6501	0.5716	0.05985	0.61844	0.07247		17.6501	0.57439	0.05493	0.64132	0.03969
17.6501	0.55116	0.03637	0.64752	0.03519	0.55599	0.03714		17.5018	0.6085	0.07976	0.67657	0.67657		17.6501	0.57724	0.05465	0.61167	0.06104		17.7984	0.51568	0.04512	0.59895	0.05139		17.7984	0.58503	0.07569	0.55776	0.0559		17.7984	0.57308	0.05198	0.66007	0.04399
17.7984	0.52888	0.03606	0.66063	0.03356	0.55948	0.03468		17.6501	0.5776	0.06973	0.6873	0.6873		17.7984	0.59304	0.05846	0.61589	0.05879		17.9467	0.52484	0.05532	0.58952	0.0554		17.9467	0.62669	0.07332	0.63386	0.06278		17.9467	0.59153	0.05218	0.678	0.04717
17.9467	0.54903	0.03807	0.64715	0.03565	0.56215	0.03773		17.7984	0.65307	0.07912	0.68518	0.68518		17.9467	0.57862	0.05849	0.58962	0.05345		18.095	0.53253	0.05458	0.59817	0.05686		18.095	0.59663	0.06664	0.58916	0.05779		18.095	0.57827	0.04904	0.66508	0.05154
18.095	0.53642	0.03818	0.6412	0.03514	0.55444	0.03998		17.9467	0.57321	0.08784	0.69344	0.69344		18.095	0.57933	0.05674	0.62994	0.05921		18.2434	0.53027	0.05296	0.59478	0.05258		18.2434	0.59573	0.07629	0.58385	0.06291		18.2434	0.55781	0.04396	0.65383	0.04078
18.2434	0.53689	0.03748	0.65611	0.03418	0.5602	0.04064		18.095	0.59361	0.06181	0.72541	0.72541		18.2434	0.58473	0.06015	0.62728	0.05705		18.3917	0.54915	0.05557	0.59495	0.05474		18.3917	0.57906	0.0622	0.57509	0.07495		18.3917	0.57273	0.04917	0.66513	0.0506
18.3917	0.54416	0.04067	0.68243	0.03883	0.5715	0.03646		18.2434	0.61143	0.07859	0.69238	0.69238		18.3917	0.57055	0.05262	0.6307	0.05963		18.54	0.53261	0.05541	0.58883	0.05078		18.54	0.57538	0.06638	0.59381	0.06824		18.54	0.5967	0.05095	0.669	0.0448
18.54	0.53727	0.04011	0.66198	0.03387	0.56851	0.039		18.3917	0.63179	0.07068	0.68558	0.68558		18.54	0.5958	0.06269	0.61527	0.06426		18.6883	0.51524	0.04844	0.58599	0.04857		18.6883	0.56877	0.08038	0.54863	0.0762		18.6883	0.56587	0.04457	0.68046	0.04435
18.6883	0.55548	0.03628	0.65285	0.03274	0.56957	0.03843		18.54	0.59685	0.07767	0.7144	0.7144		18.6883	0.58924	0.06155	0.60079	0.06072		18.8366	0.52908	0.05273	0.60263	0.05282		18.8366	0.5654	0.08656	0.58152	0.06267		18.8366	0.58794	0.05267	0.65919	0.05187
18.8366	0.54553	0.03848	0.66719	0.0356	0.55467	0.03985		18.6883	0.61821	0.06676	0.69082	0.69082		18.8366	0.55634	0.0595	0.62239	0.0626		18.985	0.53123	0.051	0.58535	0.05155		18.985	0.57015	0.07202	0.59422	0.06125		18.985	0.5718	0.05065	0.65774	0.04512
18.985	0.54212	0.0407	0.64814	0.03153	0.54624	0.03783		18.8366	0.65556	0.06887	0.68362	0.68362		18.985	0.59545	0.06712	0.62478	0.06466		19.1333	0.52078	0.05278	0.59326	0.05784		19.1333	0.56377	0.06998	0.56131	0.06697		19.1333	0.5844	0.05107	0.69095	0.04724
19.1333	0.53493	0.03982	0.64294	0.03515	0.5643	0.03655		18.985	0.59705	0.08122	0.69257	0.69257		19.1333	0.5918	0.06489	0.65353	0.06186		19.2816	0.52803	0.05484	0.60624	0.05444		19.2816	0.63255	0.07824	0.57774	0.06264		19.2816	0.56166	0.04801	0.64128	0.04645
19.2816	0.5509	0.03588	0.66705	0.03479	0.55799	0.04144		19.1333	0.62197	0.07497	0.71676	0.71676		19.2816	0.58134	0.05725	0.62481	0.05962		19.4299	0.54979	0.05093	0.58134	0.05716		19.4299	0.57699	0.06787	0.62727	0.06465		19.4299	0.57892	0.05891	0.64679	0.04836
19.4299	0.54955	0.04097	0.64766	0.03678	0.56952	0.03992		19.2816	0.60332	0.07968	0.69497	0.69497		19.4299	0.56023	0.05771	0.63055	0.06644		19.5782	0.54996	0.05288	0.57374	0.05714		19.5782	0.60268	0.0785	0.59045	0.07551		19.5782	0.60417	0.04877	0.66329	0.04814
19.5782	0.548	0.03454	0.66714	0.03548	0.56506	0.03901		19.4299	0.61282	0.07282	0.68441	0.68441		19.5782	0.59866	0.06057	0.61013	0.06127		19.7266	0.54935	0.0518	0.58549	0.05559		19.7266	0.58	0.0766	0.61113	0.07076		19.7266	0.56594	0.05865	0.6518	0.05486
19.7266	0.5328	0.04146	0.64642	0.03498	0.55255	0.03882		19.5782	0.64141	0.07237	0.70702	0.70702		19.7266	0.55918	0.05428	0.6128	0.06096		19.8749	0.53632	0.05102	0.5979	0.05181		19.8749	0.57542	0.07522	0.58901	0.06513		19.8749	0.58034	0.04962	0.65249	0.04821
19.8749	0.55214	0.03908	0.63829	0.03152	0.56176	0.04071		19.7266	0.60852	0.09773	0.67613	0.67613		19.8749	0.57996	0.05912	0.63316	0.06063		20.0232	0.54446	0.05517	0.59576	0.05281		20.0232	0.56869	0.07367	0.62492	0.06325		20.0232	0.55814	0.05021	0.6511	0.04439
20.0232	0.56207	0.04102	0.6627	0.03566	0.56918	0.03675		19.8749	0.62002	0.06631	0.68806	0.68806		20.0232	0.55244	0.05268	0.61927	0.05775		20.1715	0.56513	0.06298	0.59399	0.05071		20.1715	0.61597	0.07097	0.58191	0.07028		20.1715	0.57871	0.04956	0.67659	0.04739
20.1715	0.54582	0.04017	0.64684	0.03501	0.57929	0.03702		20.0232	0.59737	0.07451	0.69136	0.69136		20.1715	0.56455	0.05306	0.62575	0.0636		20.3198	0.55028	0.05491	0.59708	0.05548		20.3198	0.60641	0.07068	0.62059	0.07551		20.3198	0.5909	0.04754	0.64177	0.04943
20.3198	0.55024	0.03996	0.63936	0.03658	0.56356	0.03693		20.1715	0.59034	0.06253	0.67002	0.67002		20.3198	0.58383	0.05479	0.62243	0.0663		20.4682	0.52394	0.05243	0.60068	0.06032		20.4682	0.58828	0.0664	0.57147	0.07706		20.4682	0.60442	0.05427	0.65793	0.04718
20.4682	0.54884	0.03935	0.64722	0.03689	0.57495	0.04289		20.3198	0.63595	0.07123	0.6631	0.6631		20.4682	0.5509	0.05298	0.63364	0.06367		20.6165	0.52586	0.0552	0.60953	0.06162		20.6165	0.59532	0.07568	0.61771	0.06648		20.6165	0.58483	0.04903	0.64343	0.05489
20.6165	0.55927	0.04082	0.64065	0.03818	0.56035	0.0413		20.4682	0.62324	0.0951	0.68525	0.68525		20.6165	0.5965	0.05415	0.58783	0.06011		20.7648	0.5428	0.0574	0.60051	0.05281		20.7648	0.5901	0.06521	0.62298	0.07423		20.7648	0.56746	0.05193	0.65592	0.04706
20.7648	0.55972	0.04125	0.65537	0.03433	0.57062	0.03761		20.6165	0.63136	0.05706	0.71821	0.71821		20.7648	0.58481	0.05132	0.62242	0.06413		20.9131	0.54017	0.05186	0.59601	0.05528		20.9131	0.61731	0.08223	0.60053	0.07051		20.9131	0.58819	0.04787	0.66274	0.04187
20.9131	0.56687	0.03869	0.64645	0.03417	0.56091	0.0418		20.7648	0.60193	0.08131	0.66414	0.66414		20.9131	0.5818	0.05193	0.63567	0.05614		21.0614	0.54227	0.05381	0.60561	0.05778		21.0614	0.60402	0.07029	0.58399	0.06778		21.0614	0.55797	0.04991	0.65647	0.04857
21.0614	0.54594	0.03826	0.64292	0.03551	0.56788	0.04376		20.9131	0.5767	0.06564	0.68255	0.68255		21.0614	0.5897	0.05251	0.63178	0.0676		21.2098	0.53459	0.05069	0.58846	0.05102		21.2098	0.61965	0.07142	0.59181	0.06173		21.2098	0.58822	0.0528	0.65082	0.0515
21.2098	0.56898	0.04326	0.64565	0.03957	0.55995	0.03936		21.0614	0.62796	0.07443	0.66344	0.66344		21.2098	0.56511	0.05021	0.63129	0.0556		21.3581	0.55365	0.06054	0.60799	0.05655		21.3581	0.59669	0.07074	0.58505	0.0657		21.3581	0.57775	0.05004	0.6523	0.04464
21.3581	0.55704	0.04106	0.63862	0.03896	0.55906	0.03819		21.2098	0.65103	0.08108	0.70656	0.70656		21.3581	0.56257	0.05445	0.62917	0.0619		21.5064	0.53928	0.0561	0.59549	0.05933		21.5064	0.61765	0.0749	0.54747	0.0689		21.5064	0.59732	0.04973	0.66833	0.0486
21.5064	0.54142	0.0436	0.6412	0.0362	0.56676	0.04179		21.3581	0.64033	0.08484	0.68757	0.68757		21.5064	0.60442	0.05681	0.60795	0.05964		21.6547	0.55011	0.05108	0.58128	0.04921		21.6547	0.59663	0.07665	0.57075	0.0802		21.6547	0.60684	0.05613	0.66256	0.04556
21.6547	0.55033	0.04147	0.64625	0.0345	0.56903	0.03894		21.5064	0.64939	0.07243	0.66775	0.66775		21.6547	0.5709	0.05384	0.61707	0.06061		21.803	0.54712	0.05641	0.60188	0.06448		21.803	0.57277	0.07765	0.54799	0.06742		21.803	0.57593	0.04608	0.66979	0.05121
21.803	0.5612	0.03966	0.65251	0.03808	0.57482	0.04267		21.6547	0.60959	0.08816	0.66747	0.66747		21.803	0.56056	0.05694	0.6192	0.05915		21.9514	0.5338	0.05739	0.60622	0.06282		21.9514	0.59578	0.0763	0.5745	0.06366		21.9514	0.59709	0.05201	0.6394	0.04967
21.9514	0.54251	0.03688	0.64865	0.03636	0.56104	0.04228		21.803	0.61964	0.08809	0.6808	0.6808		21.9514	0.56301	0.05747	0.60159	0.06008		22.0997	0.56225	0.05798	0.59041	0.0597		22.0997	0.6137	0.08009	0.57516	0.07074		22.0997	0.60059	0.0513	0.66292	0.04954
22.0997	0.57275	0.04274	0.67555	0.0381	0.56143	0.03521		21.9514	0.63195	0.09146	0.68669	0.68669		22.0997	0.58093	0.05338	0.61252	0.06344		22.248	0.56348	0.04765	0.6203	0.05437		22.248	0.61231	0.06747	0.604	0.07231		22.248	0.59496	0.05243	0.6608	0.05139
22.248	0.56787	0.0405	0.65033	0.037	0.55176	0.03916		22.0997	0.6267	0.08277	0.66773	0.66773		22.248	0.5702	0.04622	0.6221	0.06388		22.3963	0.55511	0.05939	0.59263	0.05803		22.3963	0.58609	0.06326	0.59112	0.0633		22.3963	0.56242	0.05273	0.64434	0.04666
22.3963	0.55562	0.03802	0.66296	0.03773	0.57124	0.04156		22.248	0.63574	0.08455	0.69438	0.69438		22.3963	0.59579	0.05636	0.63043	0.0685		22.5446	0.55904	0.05922	0.58845	0.05354		22.5446	0.58133	0.06803	0.55131	0.0712		22.5446	0.56005	0.04677	0.65148	0.05389
22.5446	0.54558	0.03927	0.64642	0.03339	0.56767	0.03956		22.3963	0.60212	0.08453	0.67012	0.67012		22.5446	0.59095	0.0513	0.6282	0.06571		22.693	0.53595	0.05608	0.59683	0.05945		22.693	0.58156	0.07205	0.59498	0.0723		22.693	0.56605	0.0536	0.67199	0.05141
22.693	0.56434	0.04454	0.65667	0.03718	0.56541	0.0377		22.5446	0.62238	0.08431	0.68271	0.68271		22.693	0.55268	0.04951	0.61028	0.06022		22.8413	0.53989	0.04938	0.5972	0.05598		22.8413	0.60335	0.06256	0.59829	0.07676		22.8413	0.58596	0.05224	0.67617	0.04984
22.8413	0.5668	0.0445	0.65865	0.03477	0.55883	0.03773		22.693	0.61131	0.07245	0.65822	0.65822		22.8413	0.56955	0.05578	0.63161	0.0611		22.9896	0.56541	0.05174	0.62121	0.05686		22.9896	0.58412	0.08943	0.57296	0.07329		22.9896	0.5719	0.05654	0.65739	0.04235
22.9896	0.55126	0.04384	0.65227	0.03609	0.55705	0.03816		22.8413	0.60185	0.07305	0.72958	0.72958		22.9896	0.56833	0.05791	0.63122	0.06886		23.1379	0.53528	0.05431	0.59577	0.05859		23.1379	0.60022	0.06957	0.60102	0.06405		23.1379	0.57669	0.05051	0.65018	0.05007
23.1379	0.55465	0.04271	0.63594	0.03635	0.56039	0.03932		22.9896	0.66232	0.07467	0.65113	0.65113		23.1379	0.57626	0.0578	0.61536	0.06081		23.2862	0.53595	0.04672	0.59905	0.05296		23.2862	0.59586	0.06784	0.58802	0.06881		23.2862	0.57196	0.04964	0.67813	0.05118
23.2862	0.55413	0.04302	0.6236	0.03823	0.54801	0.03927		23.1379	0.61263	0.08746	0.67447	0.67447		23.2862	0.56502	0.0462	0.64562	0.06523		23.4346	0.53409	0.04735	0.6128	0.05704		23.4346	0.5769	0.06783	0.58988	0.07756		23.4346	0.59302	0.05314	0.66186	0.05516
23.4346	0.56903	0.04108	0.65411	0.03707	0.56563	0.043		23.2862	0.64932	0.07555	0.6871	0.6871		23.4346	0.55909	0.05443	0.62338	0.06395		23.5829	0.54191	0.05207	0.63298	0.05461		23.5829	0.58053	0.08033	0.59686	0.06883		23.5829	0.59341	0.05436	0.655	0.04828
23.5829	0.57527	0.04097	0.64123	0.03408	0.55938	0.03916		23.4346	0.65209	0.0811	0.66972	0.66972		23.5829	0.58418	0.05182	0.64941	0.0671		23.7312	0.55263	0.05192	0.60262	0.05216		23.7312	0.57859	0.08104	0.5956	0.06226		23.7312	0.58869	0.05098	0.66464	0.04728
23.7312	0.55894	0.04291	0.63854	0.03717	0.56409	0.04146		23.5829	0.65997	0.09309	0.63416	0.63416		23.7312	0.58561	0.046	0.62612	0.06532		23.8795	0.54837	0.05372	0.61165	0.0712		23.8795	0.58879	0.06317	0.59252	0.06359		23.8795	0.57303	0.05844	0.67759	0.05121
23.8795	0.55027	0.04371	0.64278	0.03794	0.56175	0.04263		23.7312	0.58051	0.10233	0.64928	0.64928		23.8795	0.55878	0.06034	0.59645	0.0637		24.0278	0.55348	0.05479	0.58666	0.05645		24.0278	0.60998	0.08266	0.57454	0.08593		24.0278	0.59531	0.05535	0.66281	0.04741
24.0278	0.56187	0.04366	0.64699	0.03792	0.56085	0.0405		23.8795	0.66155	0.08982	0.68046	0.68046		24.0278	0.59981	0.05297	0.6145	0.06252		24.1762	0.55758	0.05652	0.59225	0.06257		24.1762	0.62571	0.0714	0.57934	0.0918		24.1762	0.60294	0.05923	0.68669	0.05197
24.1762	0.54884	0.04868	0.64543	0.03766	0.57242	0.03883		24.0278	0.62081	0.11063	0.69974	0.69974		24.1762	0.57325	0.0571	0.62457	0.06436		24.3245	0.55852	0.05529	0.61034	0.05774		24.3245	0.55192	0.07236	0.58222	0.079		24.3245	0.56737	0.0504	0.65909	0.04568
24.3245	0.55818	0.04811	0.64701	0.03661	0.55513	0.04144		24.1762	0.63939	0.08937	0.68777	0.68777		24.3245	0.56948	0.04661	0.64462	0.06192		24.4728	0.54053	0.05136	0.58167	0.0569		24.4728	0.60774	0.07138	0.60905	0.0773		24.4728	0.58545	0.04946	0.6671	0.04573
24.4728	0.55376	0.04662	0.64879	0.03648	0.56375	0.04104		24.3245	0.62229	0.08384	0.67462	0.67462		24.4728	0.57119	0.05126	0.63498	0.06054		24.6211	0.54336	0.06137	0.59433	0.06319		24.6211	0.60215	0.06608	0.59513	0.08003		24.6211	0.60395	0.05624	0.6916	0.05493
24.6211	0.55059	0.04486	0.64568	0.03812	0.57095	0.04301		24.4728	0.60879	0.0965	0.69433	0.69433		24.6211	0.57253	0.05134	0.6436	0.06426		24.7694	0.53998	0.05445	0.607	0.05909		24.7694	0.60417	0.07352	0.61964	0.06842		24.7694	0.55851	0.04961	0.67179	0.04875
24.7694	0.56138	0.04354	0.6545	0.04042	0.56823	0.04499		24.6211	0.63885	0.08308	0.66001	0.66001		24.7694	0.56729	0.0544	0.63501	0.06322		24.9178	0.54262	0.06135	0.59563	0.05374		24.9178	0.61306	0.08277	0.53682	0.07313		24.9178	0.58918	0.05787	0.65821	0.04726
24.9178	0.55465	0.04516	0.6504	0.03444	0.56896	0.0445		24.7694	0.62815	0.10502	0.69091	0.69091		24.9178	0.5866	0.05605	0.6419	0.06355		25.0661	0.54305	0.05273	0.60755	0.06956		25.0661	0.59239	0.06721	0.58476	0.07135		25.0661	0.60569	0.05416	0.66177	0.04229
25.0661	0.56096	0.04093	0.65468	0.03706	0.56064	0.04218		24.9178	0.60724	0.08469	0.67019	0.67019		25.0661	0.54906	0.04961	0.61482	0.06604		25.2144	0.57048	0.05798	0.61147	0.05594		25.2144	0.62348	0.07786	0.58203	0.0825		25.2144	0.59047	0.05847	0.65873	0.05116
25.2144	0.56698	0.04454	0.66626	0.03235	0.58314	0.04133		25.0661	0.64012	0.08001	0.66181	0.66181		25.2144	0.58901	0.05085	0.6419	0.06856		25.3627	0.55558	0.05463	0.58206	0.05815		25.3627	0.6327	0.07437	0.5917	0.09196		25.3627	0.58616	0.0564	0.67354	0.04798
25.3627	0.55977	0.04541	0.63662	0.03596	0.55738	0.04301		25.2144	0.62486	0.09391	0.6576	0.6576		25.3627	0.58425	0.05256	0.63315	0.06682		25.511	0.55143	0.05574	0.62896	0.05648		25.511	0.62111	0.06696	0.57419	0.07192		25.511	0.57354	0.05812	0.69366	0.0486
25.511	0.56161	0.04564	0.65982	0.03778	0.55222	0.04092		25.3627	0.65429	0.08364	0.64838	0.64838		25.511	0.56675	0.05783	0.6293	0.06196		25.6594	0.55222	0.04967	0.62443	0.05706		25.6594	0.62314	0.07952	0.55808	0.07283		25.6594	0.57933	0.0561	0.66292	0.04885
25.6594	0.56329	0.04346	0.6737	0.03292	0.56575	0.04171		25.511	0.66968	0.09637	0.64559	0.64559		25.6594	0.5795	0.05458	0.63568	0.07107		25.8077	0.53238	0.04967	0.60909	0.0561		25.8077	0.59169	0.07806	0.59893	0.08256		25.8077	0.58696	0.04777	0.65799	0.04612
25.8077	0.58532	0.04937	0.64943	0.03714	0.56742	0.04279		25.6594	0.64054	0.08751	0.66787	0.66787		25.8077	0.57909	0.04711	0.63019	0.06702		25.956	0.57118	0.05705	0.59045	0.05653		25.956	0.62818	0.07626	0.58747	0.08371		25.956	0.57476	0.06065	0.64637	0.0433
25.956	0.56752	0.04287	0.64803	0.03815	0.58023	0.04299		25.8077	0.64622	0.08285	0.67463	0.67463		25.956	0.58406	0.05025	0.64568	0.06667		26.1043	0.55121	0.05079	0.58632	0.06222		26.1043	0.5801	0.08297	0.60215	0.06779		26.1043	0.57526	0.05874	0.6593	0.05661
26.1043	0.55755	0.04644	0.64383	0.03715	0.5505	0.04031		25.956	0.61831	0.0912	0.6605	0.6605		26.1043	0.56606	0.05343	0.61285	0.06262		26.2526	0.52766	0.05517	0.59566	0.06396		26.2526	0.58742	0.06804	0.60581	0.07673		26.2526	0.56698	0.05399	0.66507	0.041
26.2526	0.56268	0.04641	0.64999	0.03772	0.55983	0.04239		26.1043	0.6414	0.09275	0.65168	0.65168		26.2526	0.58213	0.05573	0.60142	0.06631		26.401	0.56672	0.05085	0.60005	0.05474		26.401	0.5907	0.07219	0.58141	0.08523		26.401	0.55654	0.05615	0.66949	0.04242
26.401	0.56527	0.0467	0.65725	0.03893	0.5556	0.04162		26.2526	0.62806	0.07848	0.63669	0.63669		26.401	0.59766	0.05499	0.6471	0.0599		26.5493	0.55138	0.05097	0.61193	0.05735		26.5493	0.60573	0.07246	0.54567	0.06648		26.5493	0.5745	0.05545	0.65838	0.05394
26.5493	0.56929	0.04153	0.66679	0.03449	0.56437	0.04371		26.401	0.65487	0.09189	0.66584	0.66584		26.5493	0.56229	0.05167	0.62043	0.06183		26.6976	0.55817	0.04592	0.58663	0.05911		26.6976	0.58982	0.0701	0.58191	0.0771		26.6976	0.56385	0.0585	0.6741	0.04328
26.6976	0.55863	0.0494	0.65093	0.0378	0.58482	0.04087		26.5493	0.63968	0.09578	0.65159	0.65159		26.6976	0.56469	0.05831	0.62163	0.06094		26.8459	0.54775	0.05746	0.6044	0.06526		26.8459	0.58472	0.07293	0.55751	0.07781		26.8459	0.5994	0.06103	0.67949	0.04902
26.8459	0.54855	0.04609	0.64362	0.03659	0.5629	0.04071		26.6976	0.61241	0.09212	0.64856	0.64856		26.8459	0.58427	0.05711	0.63326	0.0622		26.9942	0.56257	0.05258	0.59658	0.05698		26.9942	0.60841	0.06847	0.57088	0.06942		26.9942	0.5906	0.05603	0.6769	0.04385
26.9942	0.55208	0.0495	0.65649	0.03748	0.57272	0.0416		26.8459	0.6364	0.07242	0.65496	0.65496		26.9942	0.56132	0.05569	0.63031	0.06529		27.1426	0.55752	0.05251	0.59741	0.05579		27.1426	0.61262	0.07129	0.55644	0.10311		27.1426	0.59927	0.06142	0.67308	0.04166
27.1426	0.55931	0.04634	0.65018	0.03505	0.55538	0.04375		26.9942	0.66818	0.0908	0.6782	0.6782		27.1426	0.55985	0.0564	0.60836	0.06661		27.2909	0.52678	0.04694	0.6136	0.06495		27.2909	0.59842	0.07358	0.57091	0.07572		27.2909	0.59399	0.05773	0.65386	0.04818
27.2909	0.56147	0.04681	0.65233	0.03825	0.5725	0.04117		27.1426	0.61156	0.09147	0.67345	0.67345		27.2909	0.57925	0.05192	0.61323	0.06616		27.4392	0.52724	0.0525	0.62588	0.06578		27.4392	0.60059	0.06491	0.58246	0.07642		27.4392	0.58728	0.06209	0.69659	0.04659
--	1.01805	0.02718	1.0141	0.01774	1.01049	0.02385		27.2909	0.63129	0.0755	0.66681	0.66681		27.4392	0.57482	0.05931	0.63886	0.06435		27.5875	0.55678	0.05762	0.60225	0.0633		27.5875	0.5994	0.07105	0.58586	0.08542		27.5875	0.61031	0.06327	0.67178	0.0443
--	1.01817	0.02714	1.01365	0.018	1.01096	0.02329		27.4392	0.6085	0.08911	0.65094	0.65094		27.5875	0.57629	0.05315	0.60817	0.06764		27.7358	0.53963	0.05379	0.58743	0.0574		27.7358	0.5891	0.06689	0.60382	0.08078		27.7358	0.58833	0.05737	0.67969	0.0513
--	1.01928	0.02688	1.01442	0.01758	1.01179	0.02236		27.5875	0.6222	0.08772	0.65347	0.65347		27.7358	0.60321	0.05428	0.6506	0.07185		27.8842	0.53765	0.04956	0.59564	0.06506		27.8842	0.61653	0.0658	0.60359	0.06402		27.8842	0.56853	0.0623	0.67313	0.04798
--	1.01966	0.02684	1.01319	0.01829	1.01016	0.02427		27.7358	0.65282	0.09047	0.65576	0.65576		27.8842	0.55601	0.05197	0.62535	0.07142		--	--	--	--	--		--	--	--	--	--		--	--	--	--	--
								27.8842	--	0.08981											--	--					--	--					--	--
																					--	--					--	--					--	--
																					--	--					--	--					--	--
																					--	--					--	--					--	--
																					--	--					--	--					--	--
																					--	--					--	--					--	--
																					--	--					--	--					--	--
																					--	--					--	--					--	--
																					--	--					--	--					--	--
																					--	--					--	--					--	--
																					--	--					--	--					--	--
																					--	--					--	--					--	--
																					--	--					--	--					--	--
																					--	--					--	--					--	--
																					--	--					--	--					--	--
																					--	--					--	--					--	--
																					--	--					--	--					--	--
																					--	--					--	--					--	--
																					--	--					--	--					--	--
																					--	--					--	--					--	--
																					--	--					--	--					--	--
																					--	--					--	--					--	--
																					--	--					--	--					--	--
																					--	--					--	--					--	--
																					--	--					--	--					--	--
																					--	--					--	--					--	--
																					--	--					--	--					--	--
																					--	--					--	--					--	--
																					--	--					--	--					--	--

## Sheet: Supplement 1
Figure A						Figure B
Time, s	F, pre	95CI	F, post	95CI		Time, s	F, pre	95CI	F, post	95CI
-7.56432	1.04395	0.04541	1.00389	0.03973		-7.56432	1.00354	0.02773	0.9872	0.03562
-7.416	1.08848	0.04796	1.06287	0.04166		-7.416	1.04405	0.03018	1.01399	0.02704
-7.26768	1.04675	0.04725	1.01833	0.02714		-7.26768	1.01577	0.026	0.98428	0.02964
-7.11936	1.00734	0.03387	1.01348	0.03911		-7.11936	1.01768	0.02774	0.98124	0.02939
-6.97104	0.99898	0.05042	1.01943	0.03292		-6.97104	1.01687	0.03109	1.00368	0.0274
-6.82272	1.03682	0.03914	1.04261	0.04545		-6.82272	1.00137	0.03088	0.99366	0.03334
-6.6744	1.03402	0.03838	1.00463	0.03527		-6.6744	0.99854	0.02393	1.01674	0.03739
-6.52608	0.99229	0.04166	1.00765	0.02979		-6.52608	1.02189	0.0235	1.0049	0.03191
-6.37776	1.03966	0.04172	1.0023	0.03341		-6.37776	1.00704	0.02521	0.97865	0.02504
-6.22944	0.96291	0.04431	1.01264	0.02837		-6.22944	1.0028	0.02613	1.00448	0.02616
-6.08112	1.01378	0.03865	0.98953	0.03314		-6.08112	0.99127	0.03126	1.0032	0.02468
-5.9328	0.98959	0.03432	1.01164	0.03349		-5.9328	0.99681	0.02176	0.98485	0.0362
-5.78448	1.00685	0.03064	1.0099	0.03344		-5.78448	0.99206	0.02547	0.99485	0.02849
-5.63616	0.97839	0.03643	0.98216	0.03849		-5.63616	1.02878	0.02277	1.00618	0.03482
-5.48784	0.99371	0.03401	1.00359	0.02956		-5.48784	1.01575	0.02548	0.99701	0.02599
-5.33952	0.98223	0.02979	1.00981	0.04104		-5.33952	1.00475	0.02387	0.9585	0.02699
-5.1912	1.01361	0.0315	0.9987	0.03041		-5.1912	1.00878	0.01859	0.99635	0.0262
-5.04288	0.99303	0.02901	0.95371	0.03297		-5.04288	0.99921	0.0275	1.01677	0.02886
-4.89456	1.00851	0.02579	0.9935	0.03383		-4.89456	1.04075	0.03829	1.01202	0.02892
-4.74624	0.99428	0.03926	0.97729	0.02665		-4.74624	1.01584	0.02845	1.02898	0.02309
-4.59792	1.00597	0.03164	0.99335	0.02961		-4.59792	1.03054	0.0214	0.99708	0.02879
-4.4496	0.99748	0.03392	0.99903	0.02956		-4.4496	1.02005	0.02801	1.00437	0.0281
-4.30128	1.00749	0.04438	0.95895	0.03142		-4.30128	0.9951	0.01849	0.98824	0.02332
-4.15296	0.97054	0.03459	1.01351	0.03236		-4.15296	0.97196	0.02585	1.01984	0.02447
-4.00464	0.9842	0.03636	1.00857	0.03019		-4.00464	1.00355	0.02269	1.02455	0.02798
-3.85632	1.00449	0.04638	1.022	0.02837		-3.85632	0.99998	0.01923	1.00519	0.02544
-3.708	0.9927	0.0355	0.96134	0.04041		-3.708	1.00425	0.02432	0.98989	0.02788
-3.55968	0.99014	0.0329	1.01017	0.0348		-3.55968	0.99513	0.03151	0.99621	0.0267
-3.41136	0.9671	0.04061	0.96797	0.02497		-3.41136	0.9983	0.02003	0.9846	0.02627
-3.26304	1.0045	0.03111	0.99018	0.03864		-3.26304	1.01965	0.02825	1.02032	0.02768
-3.11472	0.99205	0.03219	0.97321	0.02922		-3.11472	0.98984	0.02565	0.97781	0.02241
-2.9664	0.98481	0.03512	0.96013	0.02942		-2.9664	0.98046	0.018	1.03186	0.02661
-2.81808	0.97902	0.03109	1.00494	0.03163		-2.81808	1.01178	0.02744	0.99422	0.02647
-2.66976	1.02073	0.02927	1.01649	0.03129		-2.66976	0.98502	0.02392	1.0236	0.03153
-2.52144	0.98594	0.04263	0.99568	0.04056		-2.52144	0.99008	0.03026	1.0052	0.0332
-2.37312	0.97212	0.03606	0.99522	0.02676		-2.37312	1.00516	0.02322	1.00426	0.02516
-2.2248	0.97995	0.03264	1.01629	0.03614		-2.2248	0.98548	0.02806	0.98357	0.02974
-2.07648	0.99022	0.03618	0.99192	0.02733		-2.07648	0.99584	0.02203	1.01357	0.03231
-1.92816	0.97618	0.03429	1.01041	0.03999		-1.92816	0.98678	0.02406	1.01348	0.02519
-1.77984	1.02497	0.0322	1.00748	0.02956		-1.77984	1.00557	0.02038	1.01127	0.0312
-1.63152	0.9753	0.03896	0.97751	0.02649		-1.63152	0.99565	0.02742	0.99308	0.02445
-1.4832	0.9734	0.03371	1.00164	0.03527		-1.4832	0.99417	0.02548	1.00862	0.03398
-1.33488	1.01628	0.03436	0.98789	0.03868		-1.33488	0.97868	0.02762	1.01146	0.02973
-1.18656	1.0016	0.03203	1.00599	0.03355		-1.18656	0.99218	0.02134	0.98538	0.02036
-1.03824	0.9875	0.03726	1.03815	0.0343		-1.03824	0.98679	0.02395	0.96019	0.0266
-0.88992	0.99631	0.04706	0.9871	0.03922		-0.88992	0.97605	0.02476	1.00761	0.03233
-0.7416	1.0124	0.03637	0.99573	0.04283		-0.7416	0.9811	0.02202	0.99481	0.03314
-0.59328	0.99295	0.04262	0.98236	0.03469		-0.59328	0.96648	0.03248	1.00803	0.03558
-0.44496	1.02106	0.0418	1.00277	0.03262		-0.44496	0.98691	0.02569	0.98362	0.02814
-0.29664	0.96742	0.03535	1.00634	0.02638		-0.29664	0.94394	0.0184	0.99055	0.03256
--	-0.28593	0.77377	-0.25418	0.80193		--	1.04474	0.29104	1.17835	0.29506
--	--	--	--	--		0	0	0	0	0
0	0	0	0	0		0.14832	0.05823	0.02587	0.10771	0.03581
0.14832	0.11001	0.05091	0.14377	0.04286		0.29664	0.1096	0.04231	0.13046	0.03359
0.29664	0.18313	0.04438	0.21827	0.0506		0.44496	0.14331	0.0393	0.19842	0.03154
0.44496	0.22287	0.04251	0.26983	0.05077		0.59328	0.20167	0.0353	0.2435	0.03252
0.59328	0.26622	0.0479	0.31159	0.04875		0.7416	0.20248	0.02461	0.26434	0.03714
0.7416	0.31886	0.05344	0.33003	0.04589		0.88992	0.24155	0.03493	0.29353	0.03804
0.88992	0.30903	0.05597	0.34044	0.05027		1.03824	0.26518	0.02896	0.32205	0.03941
1.03824	0.34354	0.04025	0.39501	0.0472		1.18656	0.27026	0.03923	0.33356	0.03672
1.18656	0.3451	0.04997	0.42741	0.04697		1.33488	0.3113	0.03185	0.38477	0.04469
1.33488	0.40096	0.05321	0.40192	0.04594		1.4832	0.31166	0.03723	0.39422	0.04678
1.4832	0.39497	0.04843	0.45443	0.05232		1.63152	0.34408	0.03427	0.41053	0.04311
1.63152	0.39576	0.04334	0.45444	0.04935		1.77984	0.34955	0.03706	0.43079	0.04206
1.77984	0.44737	0.04373	0.48993	0.04095		1.92816	0.3662	0.04174	0.44705	0.04357
1.92816	0.46371	0.06538	0.52066	0.05591		2.07648	0.36306	0.03712	0.4467	0.04465
2.07648	0.46796	0.05445	0.50433	0.04619		2.2248	0.37158	0.04039	0.47492	0.05239
2.2248	0.49399	0.05847	0.48451	0.04458		2.37312	0.40633	0.03587	0.46127	0.04556
2.37312	0.50645	0.0532	0.52107	0.05615		2.52144	0.39228	0.03862	0.43899	0.03961
2.52144	0.4883	0.05017	0.57151	0.05447		2.66976	0.39634	0.04058	0.50383	0.04255
2.66976	0.48954	0.04509	0.53802	0.05485		2.81808	0.38368	0.03918	0.49334	0.05121
2.81808	0.52444	0.05773	0.56757	0.05172		2.9664	0.43252	0.04104	0.48636	0.03735
2.9664	0.4866	0.04478	0.56268	0.06182		3.11472	0.41146	0.04221	0.50628	0.04266
3.11472	0.52442	0.05757	0.5946	0.04879		3.26304	0.42043	0.03991	0.51654	0.04999
3.26304	0.53513	0.04385	0.55749	0.04612		3.41136	0.42387	0.04201	0.52128	0.03831
3.41136	0.50886	0.04427	0.56898	0.05183		3.55968	0.45971	0.04209	0.53312	0.04059
3.55968	0.53899	0.04941	0.58056	0.04822		3.708	0.43073	0.04089	0.54915	0.04402
3.708	0.55777	0.05844	0.62119	0.05619		3.85632	0.43699	0.04697	0.53389	0.03942
3.85632	0.53861	0.06241	0.59984	0.04984		4.00464	0.45796	0.04087	0.55587	0.05252
4.00464	0.55996	0.05217	0.59676	0.04121		4.15296	0.43909	0.0438	0.5292	0.04633
4.15296	0.55647	0.05129	0.57598	0.04901		4.30128	0.46578	0.04584	0.53738	0.04389
4.30128	0.59431	0.0683	0.62784	0.05035		4.4496	0.45992	0.04003	0.53578	0.05503
4.4496	0.59532	0.05986	0.59953	0.05293		4.59792	0.4672	0.04745	0.56982	0.05239
4.59792	0.57546	0.05706	0.61661	0.04608		4.74624	0.45393	0.04037	0.57513	0.05241
4.74624	0.58658	0.05972	0.60764	0.05869		4.89456	0.46459	0.04536	0.55025	0.04112
4.89456	0.5998	0.06452	0.60838	0.04388		5.04288	0.44024	0.03924	0.56403	0.03969
5.04288	0.56211	0.0603	0.58634	0.04191		5.1912	0.46256	0.03984	0.54663	0.04868
5.1912	0.56681	0.05066	0.62724	0.0531		5.33952	0.47689	0.04792	0.55713	0.04817
5.33952	0.56349	0.05346	0.58537	0.05041		5.48784	0.45645	0.04201	0.5828	0.05139
5.48784	0.59022	0.05294	0.57836	0.05503		5.63616	0.45814	0.04424	0.53961	0.03712
5.63616	0.59579	0.05972	0.60098	0.05468		5.78448	0.44329	0.04182	0.57266	0.04739
5.78448	0.61894	0.05757	0.62534	0.04843		5.9328	0.46379	0.05006	0.57901	0.05037
5.9328	0.57848	0.05692	0.63285	0.06749		6.08112	0.46861	0.04347	0.56986	0.04835
6.08112	0.58506	0.05286	0.63219	0.05519		6.22944	0.47233	0.043	0.58572	0.05125
6.22944	0.61174	0.06401	0.61763	0.06209		6.37776	0.4769	0.04576	0.5877	0.04666
6.37776	0.60741	0.05528	0.62194	0.05428		6.52608	0.48399	0.04481	0.57515	0.04253
6.52608	0.58246	0.04846	0.617	0.05686		6.6744	0.47424	0.05351	0.59842	0.04617
6.6744	0.61181	0.05252	0.63371	0.05074		6.82272	0.47616	0.03767	0.56715	0.04538
6.82272	0.6313	0.06499	0.61056	0.05503		6.97104	0.47057	0.03634	0.5874	0.0443
6.97104	0.60295	0.06583	0.6334	0.06201		7.11936	0.48484	0.03944	0.57163	0.03831
7.11936	0.61789	0.07891	0.64819	0.05756		7.26768	0.46732	0.03779	0.60816	0.05052
7.26768	0.5885	0.05841	0.64374	0.06662		7.416	0.47004	0.04145	0.5642	0.04633
7.416	0.63852	0.06417	0.65751	0.06418		7.56432	0.49139	0.04719	0.56625	0.04965
7.56432	0.61621	0.06748	0.63183	0.05532		7.71264	0.4929	0.0478	0.57021	0.04839
7.71264	0.62841	0.06206	0.65732	0.0583		7.86096	0.48864	0.04416	0.55496	0.04202
7.86096	0.62544	0.05652	0.63212	0.06208		8.00928	0.50012	0.04583	0.60488	0.04442
8.00928	0.65815	0.07567	0.65182	0.0552		8.1576	0.49232	0.04858	0.60973	0.04922
8.1576	0.61297	0.06461	0.64305	0.05728		8.30592	0.47699	0.04786	0.60326	0.04096
8.30592	0.60972	0.06012	0.62822	0.06223		8.45424	0.4971	0.04359	0.58059	0.04558
8.45424	0.6571	0.07531	0.6612	0.06319		8.60256	0.49795	0.04365	0.59131	0.05025
8.60256	0.61656	0.06376	0.66859	0.06169		8.75088	0.48546	0.04382	0.61233	0.04762
8.75088	0.63692	0.06152	0.6634	0.06184		8.8992	0.46828	0.04597	0.59522	0.04577
8.8992	0.60206	0.06028	0.662	0.06604		9.04752	0.47093	0.04523	0.60891	0.05117
9.04752	0.61536	0.05933	0.67244	0.06885		9.19584	0.49257	0.04534	0.61456	0.04982
9.19584	0.65253	0.06628	0.6565	0.05467		9.34416	0.49632	0.04424	0.59856	0.05663
9.34416	0.6253	0.07781	0.65463	0.05679		9.49248	0.49097	0.05069	0.6064	0.05215
9.49248	0.62841	0.06742	0.63754	0.04718		9.6408	0.51198	0.05003	0.60207	0.04876
9.6408	0.62793	0.06117	0.65899	0.05884		9.78912	0.48845	0.05032	0.60818	0.05055
9.78912	0.6219	0.05585	0.64114	0.06851		9.93744	0.49395	0.04356	0.58502	0.04901
9.93744	0.64976	0.07147	0.65816	0.06022		10.0858	0.49996	0.04692	0.60073	0.0442
10.0858	0.66038	0.06323	0.63204	0.05896		10.2341	0.50557	0.0502	0.61299	0.04624
10.2341	0.60313	0.05351	0.66801	0.06193		10.3824	0.50954	0.04616	0.61422	0.04645
10.3824	0.64285	0.06965	0.65403	0.057		10.5307	0.50983	0.04927	0.59975	0.046
10.5307	0.64281	0.07153	0.67069	0.06858		10.679	0.49549	0.05565	0.61429	0.05274
10.679	0.61878	0.06084	0.65425	0.05999		10.8274	0.50217	0.04787	0.58145	0.04115
10.8274	0.70458	0.07339	0.67391	0.06721		10.9757	0.50828	0.05038	0.58856	0.04733
10.9757	0.6567	0.06806	0.67155	0.05702		11.124	0.52442	0.04661	0.60884	0.05118
11.124	0.63935	0.06664	0.66059	0.06475		11.2723	0.5173	0.04962	0.6067	0.04948
11.2723	0.64258	0.05812	0.66716	0.06114		11.4206	0.50055	0.04915	0.62475	0.04498
11.4206	0.63549	0.06961	0.65075	0.05972		11.569	0.54027	0.04882	0.57016	0.04683
11.569	0.63988	0.06903	0.64646	0.06063		11.7173	0.52085	0.05161	0.59898	0.0533
11.7173	0.61353	0.06107	0.66401	0.06423		11.8656	0.50698	0.04687	0.60409	0.05272
11.8656	0.66676	0.07397	0.66554	0.06113		12.0139	0.52371	0.04514	0.62477	0.05365
12.0139	0.65499	0.06484	0.65278	0.06441		12.1622	0.51656	0.04779	0.60166	0.05235
12.1622	0.63541	0.06717	0.69037	0.05808		12.3106	0.50488	0.05242	0.61001	0.05573
12.3106	0.64883	0.06569	0.66795	0.05599		12.4589	0.51121	0.05374	0.57745	0.05115
12.4589	0.64131	0.06857	0.7237	0.06808		12.6072	0.51473	0.05188	0.63367	0.05632
12.6072	0.64389	0.06679	0.66261	0.06007		12.7555	0.47484	0.0488	0.58939	0.05711
12.7555	0.66359	0.06543	0.66994	0.06601		12.9038	0.53882	0.05222	0.64357	0.05597
12.9038	0.64481	0.07065	0.65747	0.062		13.0522	0.52878	0.04848	0.61674	0.04868
13.0522	0.62232	0.0643	0.6858	0.06865		13.2005	0.52521	0.04974	0.6191	0.05104
13.2005	0.66525	0.06279	0.66304	0.06368		13.3488	0.52808	0.05089	0.59371	0.05766
13.3488	0.6763	0.09351	0.66731	0.05733		13.4971	0.53391	0.04761	0.62089	0.05068
13.4971	0.68375	0.08029	0.68392	0.06329		13.6454	0.53565	0.04597	0.61862	0.05624
13.6454	0.64758	0.06394	0.69882	0.06481		13.7938	0.55746	0.05771	0.61339	0.0478
13.7938	0.64068	0.06804	0.6767	0.05737		13.9421	0.52733	0.04906	0.62027	0.05797
13.9421	0.63994	0.06496	0.66296	0.07183		14.0904	0.53436	0.0531	0.61366	0.05262
14.0904	0.68405	0.07763	0.68301	0.06352		14.2387	0.51815	0.05018	0.5831	0.04772
14.2387	0.65934	0.0735	0.68632	0.05934		14.387	0.52376	0.05364	0.59279	0.04647
14.387	0.62849	0.06307	0.65684	0.06559		14.5354	0.55455	0.05202	0.60864	0.04971
14.5354	0.63993	0.06983	0.66694	0.05801		14.6837	0.52735	0.05539	0.60248	0.04664
14.6837	0.6341	0.06695	0.68233	0.06567		14.832	0.54691	0.05088	0.61563	0.05094
14.832	0.64101	0.06845	0.73247	0.06102		14.9803	0.54044	0.04696	0.57268	0.04815
14.9803	0.62196	0.07453	0.64545	0.0591		15.1286	0.51044	0.04899	0.59583	0.05345
15.1286	0.65334	0.07286	0.68874	0.06156		15.277	0.51934	0.05573	0.63448	0.05709
15.277	0.65294	0.0719	0.68004	0.05948		15.4253	0.52949	0.0558	0.63331	0.04686
15.4253	0.63037	0.07035	0.7045	0.05551		15.5736	0.53672	0.05589	0.59837	0.05332
15.5736	0.66688	0.06712	0.67408	0.0596		15.7219	0.53541	0.05772	0.6168	0.04666
15.7219	0.65766	0.07225	0.6724	0.06501		15.8702	0.53974	0.04699	0.63983	0.05108
15.8702	0.69087	0.07043	0.70561	0.06333		16.0186	0.55162	0.05683	0.63304	0.05511
16.0186	0.64755	0.06426	0.72243	0.06899		16.1669	0.53875	0.05315	0.61271	0.05143
16.1669	0.67266	0.06953	0.68438	0.0584		16.3152	0.51943	0.05518	0.61196	0.05033
16.3152	0.67924	0.07735	0.69722	0.06368		16.4635	0.52552	0.05148	0.62358	0.05302
16.4635	0.64932	0.06951	0.70933	0.07498		16.6118	0.52942	0.05428	0.6181	0.0479
16.6118	0.66317	0.08343	0.69073	0.068		16.7602	0.54112	0.05954	0.62032	0.05471
16.7602	0.66026	0.06895	0.69811	0.06615		16.9085	0.54259	0.05854	0.6051	0.04511
16.9085	0.66518	0.07853	0.65962	0.07068		17.0568	0.55226	0.05532	0.62507	0.05408
17.0568	0.68477	0.08153	0.65742	0.06794		17.2051	0.52644	0.05555	0.63199	0.05239
17.2051	0.63268	0.07612	0.66391	0.06295		17.3534	0.51917	0.05079	0.61779	0.0477
17.3534	0.65673	0.07268	0.69253	0.05905		17.5018	0.53528	0.05509	0.62994	0.05354
17.5018	0.64042	0.06518	0.65865	0.06781		17.6501	0.50929	0.05072	0.59222	0.04667
17.6501	0.66808	0.06779	0.68918	0.06303		17.7984	0.53832	0.05884	0.61177	0.04599
17.7984	0.61434	0.06092	0.67213	0.06941		17.9467	0.57224	0.05168	0.6473	0.05035
17.9467	0.661	0.07822	0.71978	0.06598		18.095	0.53433	0.05669	0.6416	0.04825
18.095	0.6476	0.0697	0.68613	0.06726		18.2434	0.5392	0.06091	0.62159	0.04606
18.2434	0.68312	0.07807	0.67592	0.06715		18.3917	0.52036	0.05209	0.60792	0.05053
18.3917	0.63859	0.07771	0.67925	0.06247		18.54	0.51299	0.05769	0.65136	0.04962
18.54	0.63618	0.07057	0.69919	0.07202		18.6883	0.54185	0.0582	0.63333	0.05604
18.6883	0.64911	0.06419	0.68373	0.06465		18.8366	0.55655	0.05953	0.60811	0.05335
18.8366	0.66756	0.06918	0.68963	0.06999		18.985	0.55774	0.05881	0.59824	0.04675
18.985	0.67969	0.07183	0.69275	0.06586		19.1333	0.53468	0.05955	0.65354	0.05307
19.1333	0.68972	0.07251	0.67237	0.06123		19.2816	0.54833	0.05859	0.63232	0.04594
19.2816	0.64695	0.07133	0.65545	0.06882		19.4299	0.54025	0.05332	0.62065	0.04825
19.4299	0.62118	0.06152	0.69478	0.08056		19.5782	0.51934	0.05593	0.64363	0.054
19.5782	0.67092	0.07232	0.72196	0.07137		19.7266	0.54519	0.05429	0.65182	0.04926
19.7266	0.64586	0.0743	0.69753	0.06375		19.8749	0.53168	0.05428	0.61848	0.04885
19.8749	0.68271	0.0777	0.67632	0.06951		20.0232	0.55183	0.05691	0.6394	0.05687
20.0232	0.64665	0.06853	0.6835	0.06964		20.1715	0.53874	0.05994	0.61879	0.05261
20.1715	0.65783	0.05268	0.69329	0.07479		20.3198	0.5632	0.06054	0.65245	0.05492
20.3198	0.66755	0.05912	0.68152	0.06574		20.4682	0.55296	0.05558	0.6365	0.05148
20.4682	0.68716	0.06661	0.69691	0.06802		20.6165	0.52693	0.05161	0.6104	0.04607
20.6165	0.65185	0.07722	0.64636	0.06749		20.7648	0.53321	0.0567	0.63036	0.0472
20.7648	0.6716	0.07704	0.67502	0.06701		20.9131	0.52731	0.05692	0.64428	0.05204
20.9131	0.70818	0.06378	0.70419	0.0631		21.0614	0.54871	0.05576	0.6342	0.05248
21.0614	0.65583	0.06647	0.6921	0.0701		21.2098	0.55656	0.0637	0.62985	0.04879
21.2098	0.66654	0.0729	0.67991	0.05804		21.3581	0.54995	0.05156	0.62929	0.054
21.3581	0.68194	0.0687	0.68061	0.06535		21.5064	0.5252	0.05609	0.61091	0.05148
21.5064	0.62398	0.05481	0.67427	0.06697		21.6547	0.55805	0.06119	0.64243	0.04786
21.6547	0.65847	0.06466	0.69927	0.06136		21.803	0.52647	0.05437	0.64882	0.05046
21.803	0.64714	0.07662	0.66573	0.05881		21.9514	0.53974	0.05863	0.63145	0.0586
21.9514	0.65263	0.07156	0.73879	0.06014		22.0997	0.53775	0.05927	0.63284	0.04372
22.0997	0.66489	0.06814	0.71231	0.06901		22.248	0.57301	0.06366	0.62528	0.055
22.248	0.6742	0.07392	0.68758	0.06199		22.3963	0.5586	0.06061	0.6271	0.05293
22.3963	0.629	0.06451	0.70489	0.06627		22.5446	0.52458	0.05843	0.62375	0.05323
22.5446	0.65062	0.06393	0.69987	0.0678		22.693	0.55293	0.06293	0.6499	0.05437
22.693	0.65333	0.06287	0.67446	0.07064		22.8413	0.56328	0.06505	0.64181	0.05065
22.8413	0.65327	0.0692	0.6541	0.06491		22.9896	0.56089	0.0583	0.61866	0.04854
22.9896	0.6471	0.06891	0.69053	0.07175		23.1379	0.54513	0.0614	0.64917	0.05734
23.1379	0.64275	0.06619	0.66765	0.06851		23.2862	0.53958	0.06239	0.63951	0.04696
23.2862	0.65144	0.06774	0.69903	0.07316		23.4346	0.5524	0.06256	0.64967	0.05644
23.4346	0.62031	0.0672	0.67418	0.05784		23.5829	0.56284	0.0654	0.62018	0.05062
23.5829	0.63375	0.07232	0.67525	0.06684		23.7312	0.54358	0.05757	0.63382	0.05198
23.7312	0.66249	0.07383	0.68732	0.06717		23.8795	0.5608	0.06682	0.61475	0.04845
23.8795	0.61175	0.05872	0.68981	0.06714		24.0278	0.51605	0.06211	0.64125	0.0453
24.0278	0.65067	0.06454	0.67849	0.07243		24.1762	0.56158	0.05976	0.64265	0.05602
24.1762	0.60031	0.06772	0.71217	0.07519		24.3245	0.54097	0.06201	0.64209	0.05297
24.3245	0.61759	0.07026	0.66629	0.07061		24.4728	0.54715	0.0637	0.639	0.051
24.4728	0.60342	0.06592	0.68079	0.0707		24.6211	0.55592	0.06741	0.65249	0.04616
24.6211	0.64107	0.07109	0.65069	0.06855		24.7694	0.5374	0.06625	0.62016	0.05764
24.7694	0.64872	0.06664	0.68125	0.07348		24.9178	0.54085	0.06102	0.62479	0.05064
24.9178	0.63179	0.0634	0.67588	0.06207		25.0661	0.50702	0.06258	0.63029	0.04832
25.0661	0.65544	0.06563	0.67687	0.07413		25.2144	0.5249	0.06558	0.62983	0.04869
25.2144	0.62785	0.06792	0.69696	0.07417		25.3627	0.56915	0.06507	0.64119	0.05166
25.3627	0.62659	0.06172	0.70507	0.06724		25.511	0.51266	0.05873	0.66382	0.05576
25.511	0.64196	0.07694	0.69918	0.06984		25.6594	0.53583	0.05993	0.63574	0.05164
25.6594	0.67035	0.07912	0.63111	0.06475		25.8077	0.55013	0.06339	0.64419	0.06
25.8077	0.62841	0.06782	0.65888	0.06773		25.956	0.53623	0.06667	0.65247	0.0476
25.956	0.61206	0.06925	0.65352	0.07459		26.1043	0.53252	0.06337	0.64021	0.06038
26.1043	0.61349	0.06926	0.69716	0.07215		26.2526	0.53867	0.06363	0.63325	0.04563
26.2526	0.61062	0.06235	0.64294	0.07022		26.401	0.55418	0.06162	0.65323	0.05546
26.401	0.64853	0.07757	0.67208	0.07255		26.5493	0.54069	0.06312	0.64134	0.04778
26.5493	0.64876	0.0783	0.66042	0.06744		26.6976	0.5599	0.06451	0.62222	0.04992
26.6976	0.64627	0.06642	0.6867	0.06659		26.8459	0.5396	0.06142	0.66937	0.05149
26.8459	0.65788	0.06387	0.68555	0.06699		26.9942	0.5372	0.06078	0.64108	0.05105
26.9942	0.62027	0.0681	0.68727	0.07446		27.1426	0.54199	0.06907	0.66325	0.05776
27.1426	0.65517	0.08031	0.69661	0.07553		27.2909	0.50857	0.06651	0.66364	0.06221
27.2909	0.62226	0.06544	0.68095	0.06588		27.4392	0.52622	0.06427	0.67257	0.04947
27.4392	0.64028	0.07745	0.69198	0.06951		27.5875	0.52363	0.06145	0.66417	0.04899
27.5875	0.62469	0.07471	0.69727	0.06791		27.7358	0.54569	0.06532	0.64837	0.04902
27.7358	0.64168	0.07231	0.69228	0.07277		27.8842	0.51347	0.05763	0.64542	0.05467
27.8842	0.64985	0.07228	0.69831	0.07029		--	--	--	--	--
							--	--
							--	--
							--	--
							--	--
							--	--
							--	--
							--	--
							--	--
							--	--
							--	--
							--	--
							--	--
							--	--
							--	--
							--	--
							--	--
							--	--
							--	--
							--	--
							--	--
							--	--
							--	--
							--	--
							--	--
							--	--
							--	--
							--	--
							--	--
							--	--
