# Supplementary material for: Rapid recycling of glutamate transporters on the astroglial surface
Source: eLife journal article supplement (doi:10.7554/elife.64714), 2021-04-16
Supplement: supp [file elife_poa_e64714_Figure_1_figure_supplement_1.pdf › elife_poa_e64714_Figure_1_figure_supplement_1.pdf]

A

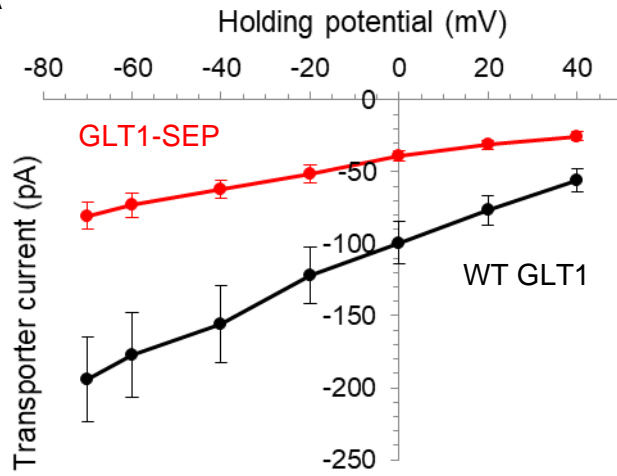

B

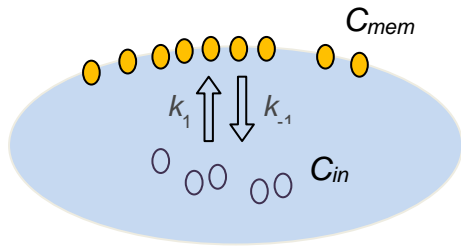

C

$$C_{in} \xrightleftharpoons[k_{-1}]{k_1} C_{mem};$$

$$C_{in} + C_{mem} = C_{tot} = \text{const};$$

$$\frac{\partial C_{mem}}{\partial t} = k_1 C_{in} - k_{-1} C_{mem};$$

$$\left. \frac{\partial C_{mem}}{\partial t} \right|_{t \rightarrow \infty} = 0;$$

$$\frac{C_{mem}}{C_{tot}} = \frac{k_1}{k_1 + k_{-1}} = R \text{ (measured);}$$

$$k_{-1} = \left( \frac{1}{R} - 1 \right) k_1 = \beta k_1$$
