# Supplementary material for: Rapid recycling of glutamate transporters on the astroglial surface
Source: eLife journal article supplement (doi:10.7554/elife.64714), 2021-04-16
Supplement: supp [file elife_poa_e64714_Figure_2_figure_supplement_1.pdf › elife_poa_e64714_Figure_2_figure_supplement_1.pdf]

*FRAP reactions*

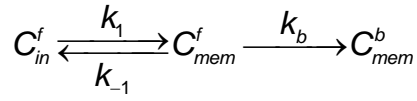

*Kinetic equations*

$$\frac{\partial C_{in}^f}{\partial t} = \beta k_1 C_{mem}^f - k_1 C_{in}^f \text{ hence } C_{in}^f = \beta C_{mem}^f - C_0 e^{-k_1 t};$$

$$\frac{\partial C_{mem}^f}{\partial t} = k_1 C_{in}^f - \beta k_1 C_{mem}^f - k_b C_{mem}^f \text{ hence}$$

$$\frac{\partial C_{mem}^f}{\partial t} = -k_1 C_0 e^{-k_1 t} - k_b C_{mem}^f \text{ hence}$$

$$C_{mem}^f = C_1 e^{-k_b t} - \frac{k_1}{k_b - k_1} C_0 e^{-k_1 t};$$

*Initial and boundary (limiting) conditions*

$$C_{mem}^f \Big|_{t=0} = 0 \text{ hence } C_{mem}^f = \frac{k_1}{k_b - k_1} C_0 \left( e^{-k_b t} - e^{-k_1 t} \right);$$

$$C_{mem}^f \Big|_{k_b=0, t \rightarrow \infty} = RC_{in} \text{ hence}$$

*Fluorescence kinetics*

$$C_{mem}^f = RC_{in} \left( e^{-k_b t} - e^{-k_1 t} \right)$$
