# Supplementary figures and images for: Rapid recycling of glutamate transporters on the astroglial surface
Source: eLife journal article supplement (doi:10.7554/elife.64714), 2021-04-16

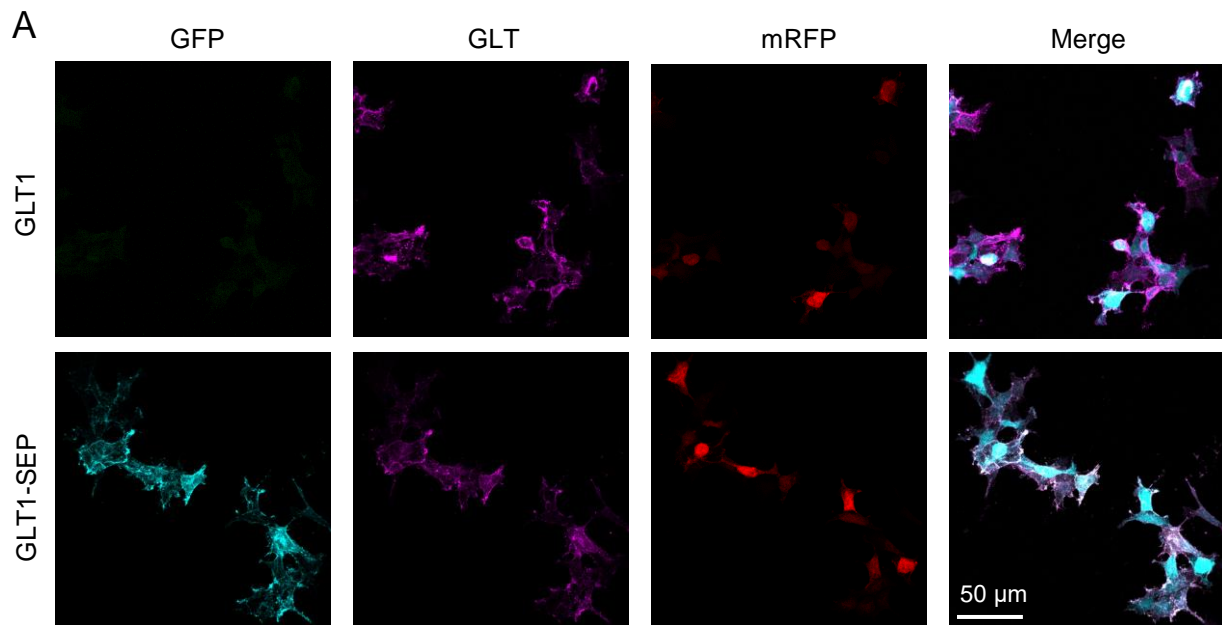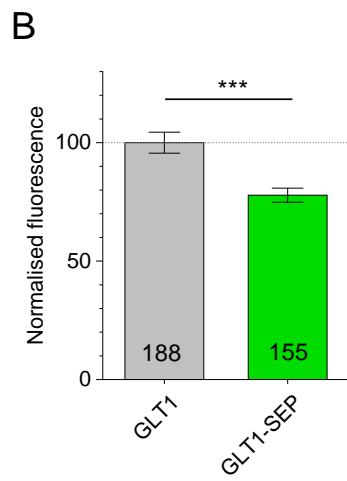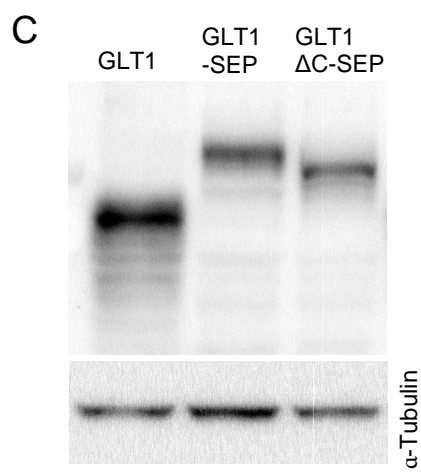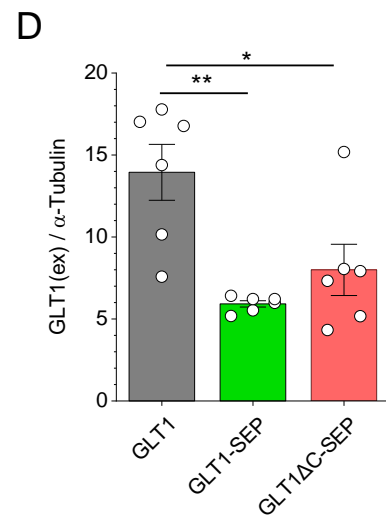

Supplement: supp [file elife_poa_e64714_Figure_1_figure_supplement_2.pdf › elife_poa_e64714_Figure_1_figure_supplement_2.pdf]

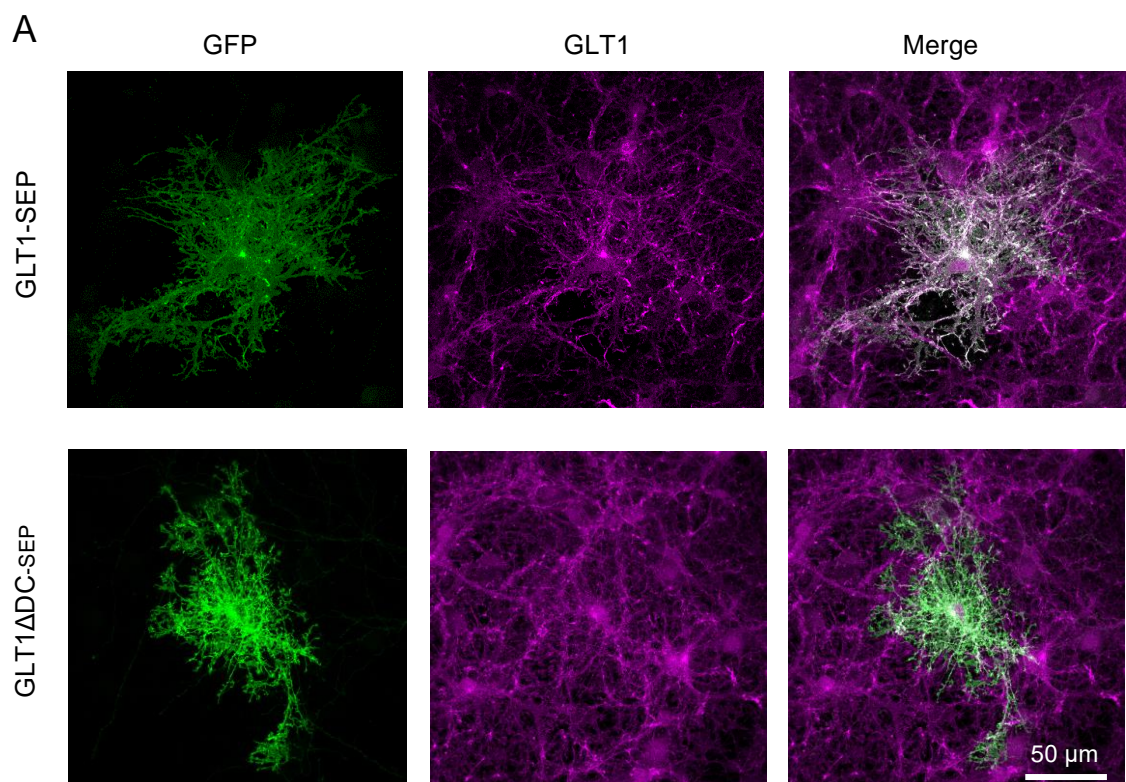

**B**

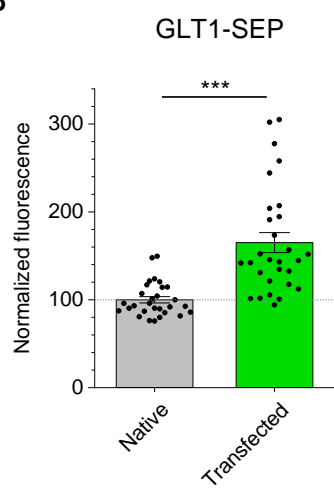

GLT1ΔC-SEP

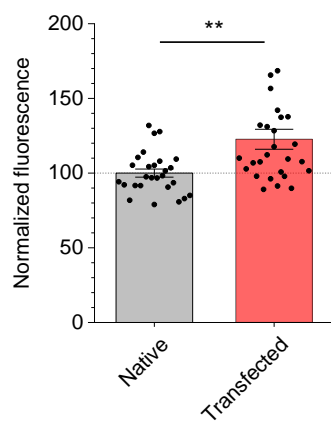

**C**

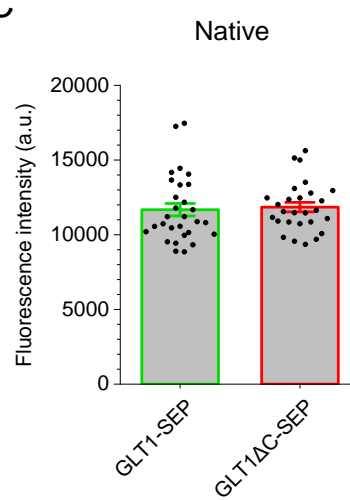

Supplement: supp [file elife_poa_e64714_Figure_1_figure_supplement_3.pdf › elife_poa_e64714_Figure_1_figure_supplement_3.pdf]

A

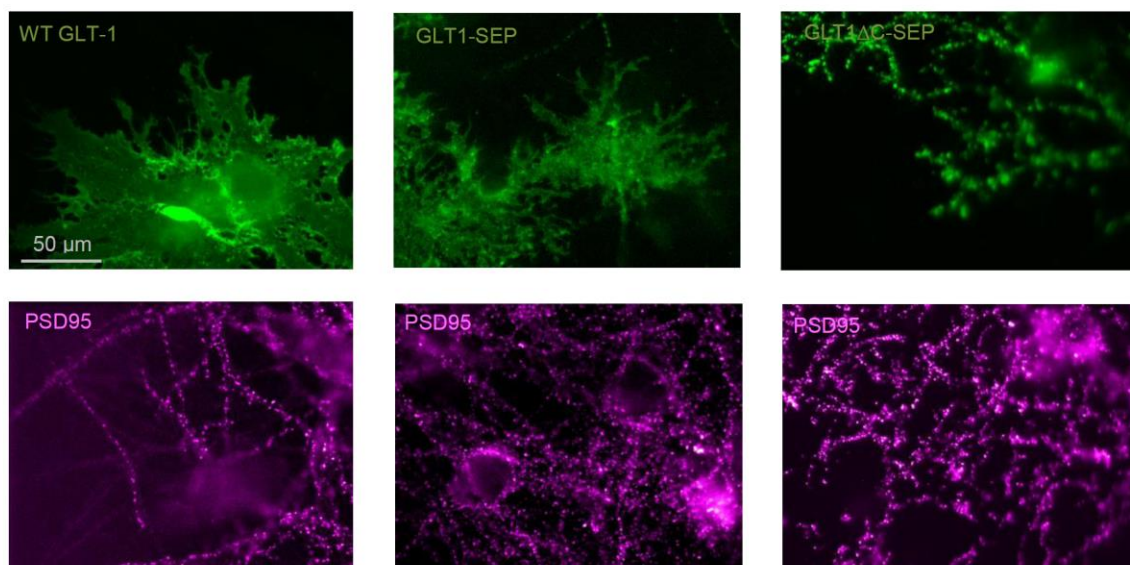

B

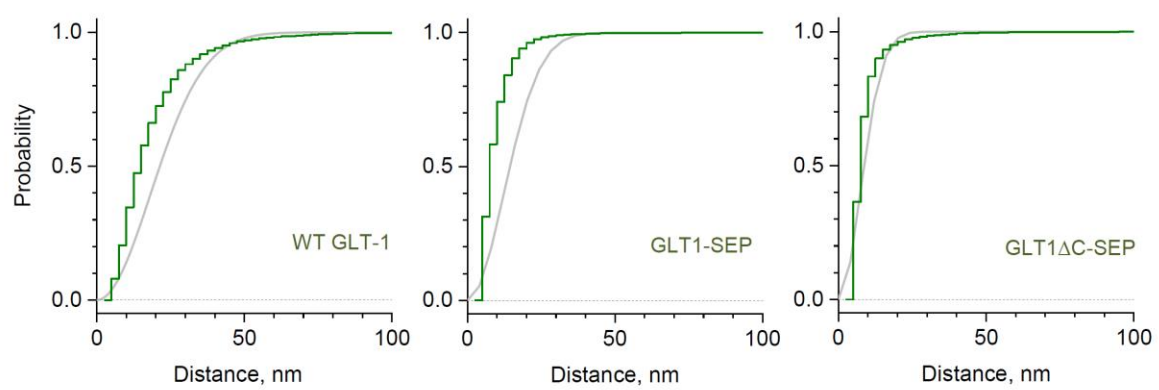

Supplement: supp [file elife_poa_e64714_Figure_3_figure_supplement_1.pdf › elife_poa_e64714_Figure_3_figure_supplement_1.pdf]

A

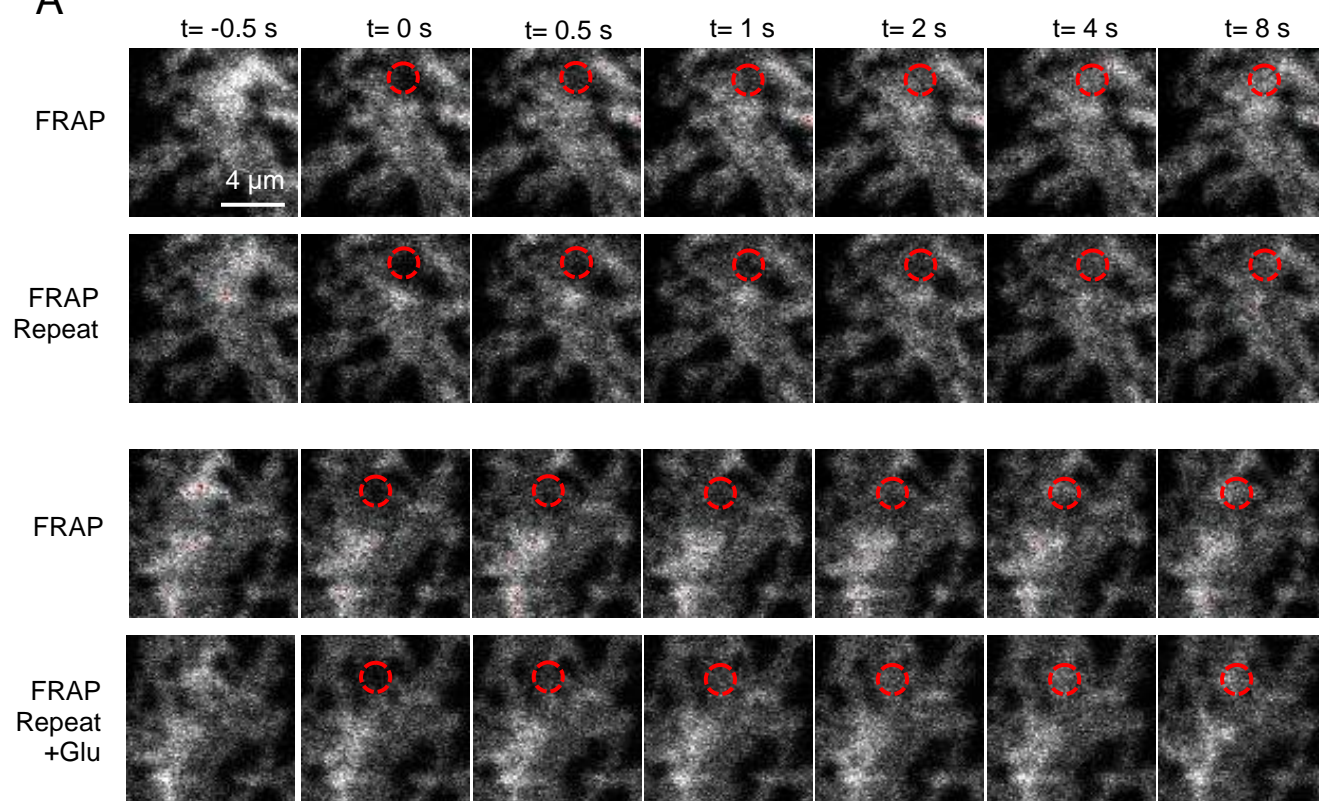

B

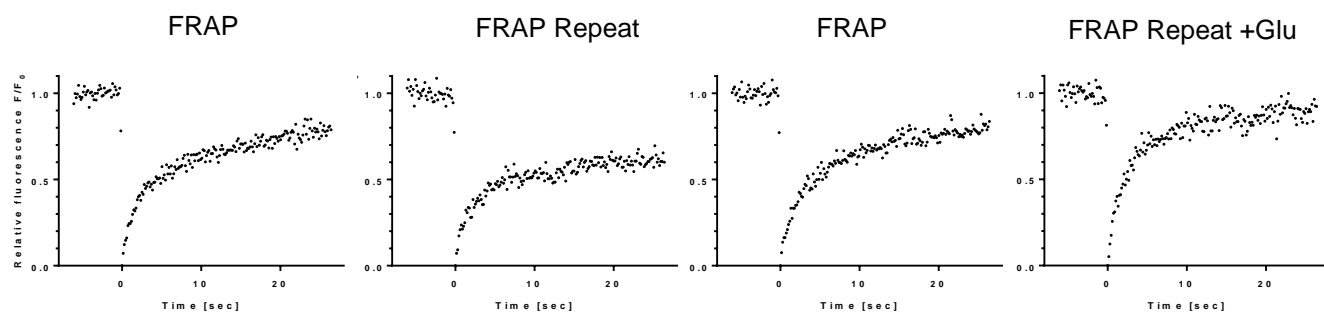

Supplement: supp [file elife_poa_e64714_Figure_4_figure_supplement_1.pdf › elife_poa_e64714_Figure_4_figure_supplement_1.pdf]

A

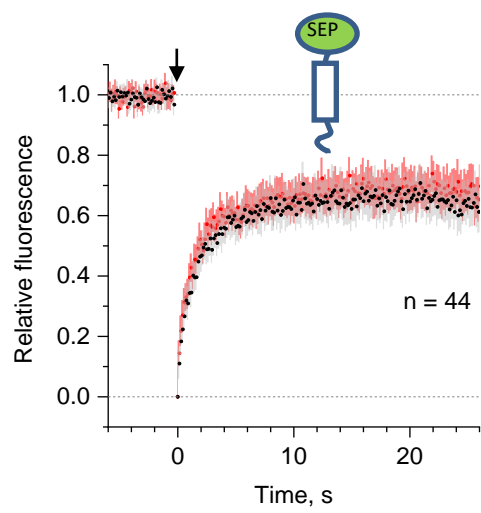

B

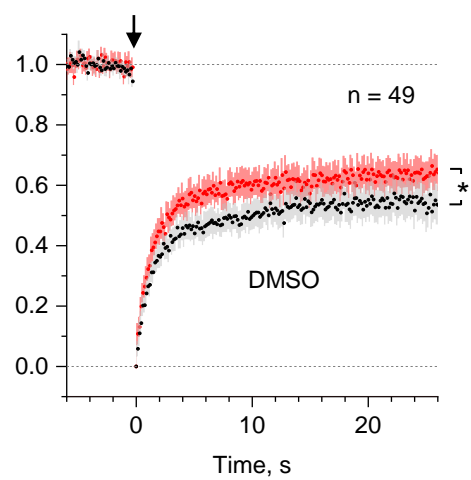

Supplement: supp [file elife_poa_e64714_Figure_5_figure_supplement_1.pdf › elife_poa_e64714_Figure_5_figure_supplement_1.pdf]
